# Supplementary material for: Nest substrate reflects incubation style in extant archosaurs with implications for dinosaur nesting habits
Source: PubMed Central journal article supplement (PMC5854591; doi:10.1038/s41598-018-21386-x), 2018-03-15
Supplement: 41598_2018_21386_MOESM1_ESM.pdf [file 41598_2018_21386_MOESM1_ESM.pdf]

# Nest substrate reflects incubation style in extant archosaurs with implications for dinosaur nesting habits

Kohei Tanaka, Darla K. Zelenitsky, François Therrien, and Yoshitsugu Kobayashi

**Supplementary Table S1. Mean nest temperature ( $T_{\text{nest}}$ , °C), mean ambient air temperature ( $T_{\text{air}}$ , °C), and the difference between  $T_{\text{nest}}$  and  $T_{\text{air}}$  (°C) of living covered nesters.**

Note that \* indicates mean values were calculated in this study using the data provided by the papers.

| Incubation heat source | Taxon                           | $T_{\text{nest}}$ | $T_{\text{air}}$ | Difference | References                    |
|------------------------|---------------------------------|-------------------|------------------|------------|-------------------------------|
| Microbial respiration  | <i>Aepyodius arfakianus</i>     | 31.100            | 21.800           | 9.300      | Sinclair (2001)               |
|                        | <i>Aepyodius</i> sp.            | 37.800            | 15.600           | 22.200     | Frith (1956)                  |
|                        | <i>Alectura lathamii</i>        | 33.300            | 15.100           | 18.200     | Jones (1988)                  |
|                        |                                 | 32.950            | 17.800           | 15.150     | Seymour and Bradford (1992)   |
|                        | <i>Leipoa ocellata</i>          | 32.626*           | 27.185*          | 5.441      | Lewis (1940)                  |
|                        | <i>Megapodius decollatus</i>    | 31.100            | 22.100           | 9.000      | Sinclair (2001)               |
|                        | <i>Megapodius freycinet</i>     | 34.400            | 26.750           | 7.650      | Lincoln (1974)                |
|                        |                                 | 33.500*           | 26.750*          | 6.750      | Stuebing and Johan (1986)     |
|                        | <i>Megapodius laperouse</i>     | 31.300            | 28.500           | 2.800      | Wiles and Conry (2001)        |
|                        | <i>Megapodius nicobariensis</i> | 32.440            | 28.170           | 4.270      | Sivakumar and Sankaran (2003) |
|                        | <i>Talegalla jobiensis</i>      | 30.600            | 21.800           | 8.800      | Sinclair (2001)               |

| Incubation heat source | Taxon                                         | T <sub>nest</sub>          | T <sub>air</sub> | Difference | References                          |
|------------------------|-----------------------------------------------|----------------------------|------------------|------------|-------------------------------------|
|                        | <i>Alligator mississippiensis</i>             | 34.034                     | 28.020           | 6.014      | McIlhenny (1934)                    |
|                        |                                               | 28.200                     | 30.700           | -2.500     | Joanen (1969)                       |
|                        |                                               | 29.833                     | 28.267           | 1.566      | Chabreck (1973)                     |
|                        | <i>Caiman c. crocodilus</i>                   | 29.900*                    | 29.571*          | 0.329      | Staton and Dixon (1977)             |
|                        | <i>Crocodylus cataphractus</i>                | 30.700*                    | 25.500*          | 5.200      | Waitkuwait (1985)                   |
|                        | <i>Melanosuchus niger</i>                     | 31.200                     | 27.900           | 3.300      | Villamarln-Jurado and Suarez (2007) |
|                        | Geothermal heat                               | <i>Macrocephalon maleo</i> | 35.000*          | 28.250*    | 6.750                               |
|                        | <i>Megapodius eremita</i>                     | 33.000                     | 32.000           | 1.000      | Roper (1983)                        |
|                        | <i>Megapodius pritchardii</i>                 | 32.500*                    | 27.000*          | 5.500      | Goth and Vogel (1996–1997)          |
| Solar radiation        | <i>Eulipoa wallacei</i> (dry season values)   | 32.600                     | 27.442*          | 5.158      | Heij et al. (1997)                  |
|                        | <i>Eulipoa wallacei</i> (rainy season values) | 32.500                     | 26.285*          | 6.215      | Heij et al. (1997)                  |
|                        | <i>Macrocephalon maleo</i>                    | 36.000                     | 31.000           | 5.000      | MacKinnon (1978)                    |
|                        | <i>Megapodius laperouse</i>                   | 33.500*                    | 30.2500*         | 3.250      | Glass et al. (1988)                 |
|                        | <i>Crocodylus acutus</i>                      | 31.670                     | 30.689           | 0.981      | Charruau (2012)                     |
|                        | <i>Crocodylus niloticus</i>                   | 32.725*                    | 31.213*          | 1.512      | Modha (1967)                        |

**Supplementary Table S2. Nest type, nest material, and heat source of incubation in living covered nesters.**

Abbreviations: C, clay; H, in-filled hole nest; I, inorganic heat source; M, mound nest; O, organic heat source (with possibly some inorganic heat); PS, plant material and/or soil; Sa, sand.

| Order       | Species                       | Nest type | Nest material | Heat source | References                                                                                                               |
|-------------|-------------------------------|-----------|---------------|-------------|--------------------------------------------------------------------------------------------------------------------------|
| Galliformes | <i>Aepyodius arfakianus</i>   | M         | PS            | O           | Sinclair (2001)                                                                                                          |
|             | <i>Aepyodius bruijni</i>      | M         | PS            | O           | Mauro (2005)                                                                                                             |
|             | <i>Alectura lathami</i>       | M         | PS            | O           | Le Souef (1899); Frith (1956)                                                                                            |
|             | <i>Eulipoa wallacei</i>       | H         | Sa            | I           | Ripley (1960); Rand and Gilliard (1967); Dekker et al. (1995); Heij et al. (1997); Baker (1999); Baker and Dekker (2000) |
|             | <i>Leipoa ocellata</i>        | M         | Sa            | O           | Le Souef (1899); Frith (1956; 1959)                                                                                      |
|             | <i>Macrocephalon maleo</i>    | H         | Sa            | I           | MacKinnon (1978); Dekker (1988); Argeloo and Dekker (1996)                                                               |
|             |                               | H         | PS            | I           | Dekker (1988)                                                                                                            |
|             | <i>Megapodius bernsteinii</i> | M         | PS            | I           | Indrawan et al. (1998)                                                                                                   |
|             |                               | M         | Sa            | I           | Indrawan et al. (1998)                                                                                                   |
|             | <i>Megapodius cumingii</i>    | M         | Sa            | O           | Jones et al. (1995)                                                                                                      |
|             | <i>Megapodius decollatus</i>  | M         | PS            | O           | Sinclair (2001)                                                                                                          |
|             | <i>Megapodius eremita</i>     | H         | Sa            | I           | Roper (1983)                                                                                                             |
|             | <i>Megapodius forstenii</i>   | M         | PS            |             | Jones et al. (1995)                                                                                                      |
|             |                               | M         | Sa            |             | Jones et al. (1995)                                                                                                      |

| Order | Species                                       | Nest<br>type | Nest<br>material | Heat<br>source | References                                     |
|-------|-----------------------------------------------|--------------|------------------|----------------|------------------------------------------------|
|       |                                               | M            | PS               |                | Stresemann (1914)                              |
|       | <i>Megapodius freycinet</i>                   | H            | Sa               | O              | MacKinnon (1978)                               |
|       |                                               | M            | Sa               | I              | Lincoln (1974)                                 |
|       |                                               | M            | PS               |                | Ripley (1960)                                  |
|       |                                               | M            | PS               | O              | Lincoln (1974)                                 |
|       | <i>Megapodius laperous</i><br><i>laperous</i> | H            | Sa               |                | Falanruw (1975)                                |
|       | <i>Megapodius l. senex</i>                    | H            | PS               | I              | Glass et al. (1988)                            |
|       |                                               | M            | PS               |                | Stinson and Glass (1992)                       |
|       |                                               | M            | Sa               | O              | Wiles and Conry (2001)                         |
|       | <i>Megapodius layardi</i>                     | H            | PS               | O              | Bowen (1996)                                   |
|       |                                               | H            | PS               | I              | Bregulla (1992)                                |
|       | <i>Megapodius<br/>nicobariensis</i>           | M            | Sa               | O              | Sankaran (1995); Sivakumar and Sankaran (2003) |
|       | <i>Megapodius pritchardii</i>                 | H            | Sa               | I              | Friedlander (1899)                             |
|       |                                               | H            | PS               | I              | Kellers (1931); Weir (1973)                    |
|       | <i>Megapodius reinwardt</i>                   | M            | PS               | O              | Le Souef (1899); Crome and Brown (1979)        |
|       |                                               | M            | Sa               | O              | Crome and Brown (1979)                         |
|       | <i>Talegalla cuvieri</i>                      | M            | PS               |                | Gilliard and LeCroy (1970)                     |
|       | <i>Talegalla fuscirostris</i>                 | M            | PS               |                | Jones et al. (1995)                            |

| Order                         | Species                           | Nest type | Nest material | Heat source                               | References                                                                                                    |
|-------------------------------|-----------------------------------|-----------|---------------|-------------------------------------------|---------------------------------------------------------------------------------------------------------------|
|                               | <i>Talegalla jobiensis</i>        | M         | PS            | O                                         | Sinclair (2001)                                                                                               |
| Crocodylia                    | <i>Alligator mississippiensis</i> | M         | PS            | O                                         | Joanen (1969); Chabreck (1975); Metzen (1977); Goodwin and Marion (1978)                                      |
|                               | <i>Alligator sinensis</i>         | M         | PS            | O                                         | Thorbjarnarson et al. (2001)                                                                                  |
|                               | <i>Caiman crocodilus</i>          | M         | PS            | O                                         | Ouboter and Nanhoe (1987); Allsteadt (1994)                                                                   |
|                               |                                   | M         | PS            | O                                         | Staton and Dixon (1977)                                                                                       |
|                               | <i>Caiman latirostris</i>         | M         | PS            |                                           | Montini et al. (2006)                                                                                         |
|                               | <i>Caiman yacare</i>              | M         | PS            |                                           | Crawshaw and Schaller (1980); Cintra (1988)                                                                   |
|                               | <i>Crocodylus acutus</i>          | H         | Sa            | I                                         | Platt and Thorbjarnarson (2000); Charruau (2012)                                                              |
|                               |                                   | M         | PS            |                                           | Ogden (1978); Mazzotti (1989)                                                                                 |
|                               |                                   | M         | Sa            |                                           | Ogden (1978); Lutz and Dunbar-Vooper (1984); Kushlan and Mazzotti (1989); Mazzotti (1989)                     |
|                               | <i>Crocodylus cataphractus</i>    | M         | PS            | O                                         | Waitkuwait (1985)                                                                                             |
|                               | <i>Crocodylus intermedius</i>     | H         | Sa            |                                           | Medem (1981); Bolhm (1982); Thorbjarnarson and Hernandez (1993); Seijas (1998); Espinosa-Blanco et al. (2013) |
|                               |                                   | M         | PS            |                                           | Medem (1981)                                                                                                  |
|                               | <i>Crocodylus johnstoni</i>       | H         | Sa            | I                                         | Webb et al. (1983a); Somaweera and Shine (2013)                                                               |
| <i>Crocodylus mindorensis</i> | M                                 | PS        |               | van Weerd et al. (2006); van Weerd (2010) |                                                                                                               |

| Order | Species                        | Nest type | Nest material | Heat source | References                                                                                     |
|-------|--------------------------------|-----------|---------------|-------------|------------------------------------------------------------------------------------------------|
|       | <i>Crocodylus moreletii</i>    | M         | PS            | O           | Platt et al. (2008); Lopez-Luna et al. (2015)                                                  |
|       | <i>Crocodylus niloticus</i>    | H         | C             |             | Pooley (1969)                                                                                  |
|       |                                | H         | Sa            | I           | Cott (1961); Modha (1967); Pooley (1969); Kofron (1989); Swanepoel et al. (2000)               |
|       | <i>Crocodylus novaeguineae</i> | M         | PS            | O           | Neil (1946); Hall and Johnson (1987)                                                           |
|       | <i>Crocodylus palustris</i>    | H         | C             |             | Whitaker and Whitaker (1976)                                                                   |
|       |                                | H         | Sa            |             | Whitaker and Whitaker (1976); Rao and Gurjwar (2013)                                           |
|       | <i>Crocodylus porosus</i>      | H         | PS            |             | Whitaker and Whitaker (1976)                                                                   |
|       |                                | M         | PS            | O           | Webb et al. (1977; 1983b)                                                                      |
|       | <i>Crocodylus siamensis</i>    | M         | PS            |             | Bezuijen et al. (2013)                                                                         |
|       | <i>Gavialis gangeticus</i>     | H         | Sa            |             | Bustard (1980); Rao (1988); Nair and Katdare (2013); Rao et al. (2013); Rao and Gurjwar (2013) |
|       | <i>Melanosuchus niger</i>      | M         | PS            | O           | Herron et al. (1990); Villamarln-Jurado and Suarez (2007)                                      |
|       | <i>Osteolaemus tetraspis</i>   | M         | PS            |             | Riley and Huchzermeyer (1999)                                                                  |
|       | <i>Paleosuchus palpebrosus</i> | M         | PS            |             | Medem (1958; 1971)                                                                             |
|       | <i>Paleosuchus trigonatus</i>  | M         | PS            | O           | Magnusson et al. (1985); Rivas et al. (2001)                                                   |
|       | <i>Tomistoma schlegelii</i>    | M         | PS            |             | Staniewicz (2011)                                                                              |

**Supplementary Table S3. Lithology of in-situ dinosaur eggs (clutches and nesting grounds).**

\*Indicates pedogenic feature(s) is identified. Abbreviation: NA, not available; TMP, Royal Tyrrell Museum of Palaeontology, Drumheller, Canada.

| Ootaxon/taxon                                    | Material   | Lithology | Formation    | Locality                                                          | References                   |
|--------------------------------------------------|------------|-----------|--------------|-------------------------------------------------------------------|------------------------------|
| Cairanoolithidae                                 |            |           |              |                                                                   |                              |
| <i>Cairanoolithus dughii</i>                     | Clutch(es) | Fine      | NA           | Commune de Rousset,<br>near Cairanne, Aix-en-<br>Provence, France | Williams et al. (1984)       |
| <i>Cairanoolithus</i> cf.<br><i>roussetensis</i> | Clutch(es) | Fine      | Tremp        | Coll de Nargo, Lleida,<br>Catalonia, Spain                        | Sellés et al. (2013)         |
| Dendroolithidae<br>(/Phaceloolithidae)           |            |           |              |                                                                   |                              |
| <i>D. cf. dendriticus</i>                        | Clutch(es) | Fine      | Chichengshan | Shuangtang Tiantai<br>Basin, Zhejiang, China                      | Fang et al. (1998; 2000)     |
| <i>D. fengguangcunensis</i>                      | Clutch(es) | Coarse    | Dongyuan     | Heyuan Basin,<br>Guangdong, China                                 | Fang et al. (2005)           |
| <i>D. sp.</i>                                    | Clutch(es) | Coarse    | Nemegt       | Khaichin Ula, Gobi,<br>Mongolia                                   | Suzuki and Watabe<br>(2000b) |
| <i>Phaceloolithus</i><br><i>hunanensis</i>       | Clutch(es) | Fine      | Fenshuiiao   | Western Dongting<br>Basin, Hunan, China                           | Zeng and Zhang (1979)        |
| Dendroolithidae indet.                           | Clutch(es) | Coarse    | ?Djadokhta   | Toosgot area, Abdrant<br>Nuru, Gobi, Mongolia                     | Watabe (2004)                |

| Ootaxon/taxon                               | Material                                 | Lithology | Formation    | Locality                                                             | References           |
|---------------------------------------------|------------------------------------------|-----------|--------------|----------------------------------------------------------------------|----------------------|
| Dendroolithidae indet.                      | Clutch(es)                               | Coarse    | Shiwa        | Shiwa Bay, Whaseong,<br>Gyeonggi, South Korea                        | Lee (2003)           |
| Dendroolithidae indet.                      | Clutch(es)<br>(Location 8-1G)            | Fine      | Sihwa        | Hanyom, Sihwa Basin,<br>South Korea                                  | Kim et al. (2009)    |
| Dendroolithidae indet.                      | Clutch(es)<br>(Locations 8-2 and<br>8-3) | Coarse    | Sihwa        | Hanyom, Sihwa Basin,<br>South Korea                                  | Kim et al. (2009)    |
| Dendroolithidae indet.                      | Clutch(es)                               | Fine      | Baynshire    | Bayn Shire, Gobi,<br>Mongolia                                        | Watabe et al. (2010) |
| <i>Torvosaurus</i>                          | Clutch(es) with<br>embryonic bones       | Fine      | Lourinha     | Walen, Porto das<br>Barcas, Portugal                                 | Araujo et al. (2013) |
| Dictyoolithidae                             |                                          |           |              |                                                                      |                      |
| <i>Dictyoolithus<br/>gongzhulingensis</i>   | Clutch(es)                               | Fine      | Quantou      | Gongzhuling area, Jilin,<br>China                                    | Wang et al. (2006)   |
| <i>D. hongpoensis</i>                       | Clutch(es)                               | Coarse    | Chichengshan | Lishui Basin, Zhejiang,<br>China                                     | Jin et al. (2010)    |
| <i>Protodictyoolithus<br/>neixiangensis</i> | Clutch(es)                               | Fine      | Goseong      | Yeondo, Dosanmyeon,<br>Tongyeong City,<br>Gyeongsang, South<br>Korea | Kim et al. (2011)    |
| <i>P. neixiangensis</i>                     | Clutch(es)                               | Fine      | Goseong      | Southwest coast                                                      | Kim et al. (2011)    |



| Ootaxon/taxon                            | Material       | Lithology | Formation              | Locality                                                               | References                   |
|------------------------------------------|----------------|-----------|------------------------|------------------------------------------------------------------------|------------------------------|
|                                          |                |           |                        | Pyeongri, Dosanmyeon,<br>Tongyeong City,<br>Gyeongsang, South<br>Korea |                              |
| Elongatoolithidae                        |                |           |                        |                                                                        |                              |
| <i>Ellipsoolithus<br/>khedaensis</i>     | Clutch(es)     | Coarse*   | Lameta                 | Lavariya Muwada,<br>Kheda, Gujarat, India                              | Mohabey (1998)               |
| <i>Elongatoolithus<br/>andrewsi</i>      | Clutch(es)     | Fine      | Yuanpu and<br>Pingling | Tangmienling, Shuikou,<br>Nanxiong Basin,<br>Guangdong, China          | Young (1965); Zhao<br>(1975) |
| <i>E. elongatus</i>                      | Clutch(es)     | Fine      | Yuanpu and<br>Pingling | Nanxiong Basin,<br>Guangdong, China                                    | Young (1965); Zhao<br>(1975) |
| <i>E. elongatus</i>                      | Clutch(es)     | Coarse    | NA                     | Baiyuan, Pingxiang,<br>Jiangxi, China                                  | Wu and Peng (2003)           |
| <i>E. magnus</i>                         | Clutch(es)     | Fine      | Fenshuiao              | Western Dongting<br>Basin, Hunan, China                                | Zeng and Zhang (1979)        |
| <i>Macroelongatoolithus<br/>carlylei</i> | A pair of eggs | Fine      | Wayan                  | Bonneville County,<br>Idaho, USA                                       | Krumenacker et al.<br>(2016) |
| <i>M. goseongensis</i>                   | Clutch(es)     | Fine      | Goseong                | Ddabakseom, Pyeongri,<br>Dosanmyeon,<br>Tongyeong City,                | Kim et al. (2011)            |

| Ootaxon/taxon                | Material   | Lithology | Formation              | Locality                                                                                    | References                           |
|------------------------------|------------|-----------|------------------------|---------------------------------------------------------------------------------------------|--------------------------------------|
|                              |            |           |                        | Gyeongsang, South<br>Korea                                                                  |                                      |
| <i>M. xixiaensis</i>         | Clutch(es) | Fine      | Gaogou                 | Xixia Basin, Henan,<br>China                                                                | Wang and Zhou (1995)                 |
| <i>M. xixiaensis</i>         | Clutch(es) | Fine      | NA                     | Zhouzhi Hill, Zhaoying<br>Village, Yangcheng<br>Town, Xixia Basin,<br>Henan, China          | Li et al. (1995)                     |
| <i>M. xixiaensis</i>         | Clutch(es) | Fine      | Chichengshan           | Shuangtang, Tiantai<br>Basin, Zhejiang, China                                               | Wang et al. (2010)                   |
| <i>M. xixiaensis</i>         | Clutch(es) | Fine      | Gyeongsang<br>Basin    | Located on the island of<br>Aphae-do in Shinan-<br>gun, Jeollanam-do,<br>southwestern Korea | Huh et al. (2014)                    |
| <i>Macroolithus rugustus</i> | Clutch(es) | Fine      | Yuanpu and<br>Pingling | Lashuyuan, Wuching,<br>Nanxiong Basin,<br>Guangdong, China                                  | Young (1965); Zhao<br>(1975)         |
| <i>M. rugustus?</i>          | Clutch(es) | Coarse*   | Nemegt                 | Khaychin-Ula, Gobi,<br>Mongolia                                                             | Sochava (1969);<br>Mikhailov (1994b) |
| <i>M. yaotunensis</i>        | Clutch(es) | Fine      | Yuanpu and<br>Pingling | Yaotun, Nanxiong<br>Basin, Guangdong,                                                       | Young (1965); Zhao<br>(1975)         |

| Ootaxon/taxon                              | Material   | Lithology | Formation              | Locality                                                  | References                                             |
|--------------------------------------------|------------|-----------|------------------------|-----------------------------------------------------------|--------------------------------------------------------|
|                                            |            |           |                        | China                                                     |                                                        |
| <i>M. yaotunensis</i>                      | Clutch(es) | Fine      | Yuanpu and<br>Pingling | Yaotun, Nanxiong<br>Basin, Guangdong,<br>China            | Young (1965); Zhao<br>(1975)                           |
| <i>Nanhsiungoolithus<br/>chuetienensis</i> | Clutch(es) | Fine      | Yuanpu and<br>Pingling | Nanxiong, Nanxiong<br>Basin, Guangdong,<br>China          | Young (1965); Zhao<br>(1975)                           |
| <i>Trachoolithus</i> sp.                   | Clutch(es) | Coarse*   | Lameta                 | Lavariay Muwada,<br>Gujarat, India                        | Mohabey (2000; 2001)                                   |
| Elongatoolithidae indet.                   | Clutch(es) | Coarse    | Shiwa                  | Shiwa Bay, Whaseong,<br>Gyeonggi, South Korea             | Lee (2003)                                             |
| Elongatoolithidae indet.                   | Clutch(es) | Coarse    | Djadokhta              | Bayn Dzak, Gobi,<br>Mongolia                              | Watabe et al. (2010)                                   |
| Elongatoolithidae indet.                   | Clutch(es) | Coarse    | Baynshire              | Bayn Shire, Gobi,<br>Mongolia                             | Watabe et al. (2010)                                   |
| Elongatoolithidae indet.                   | Clutch(es) | Coarse    | NA                     | Tel Ulan Chaltsai<br>(Mogoin Daatsyn<br>Khuduk), Mongolia | Watabe et al. (2010)                                   |
| <i>E. frustrabilis</i>                     | Clutch(es) | Coarse    | Djadokhta              | Shabarakh Usu MNG,<br>Mongolia                            | Brown and Schlaikjer<br>(1940); van Straelen<br>(1925) |

| Ootaxon/taxon                                                  | Material                        | Lithology | Formation   | Locality                                                                    | References                                        |
|----------------------------------------------------------------|---------------------------------|-----------|-------------|-----------------------------------------------------------------------------|---------------------------------------------------|
| <i>E. frustrabilis?</i>                                        | Clutch(es) with embryonic bones | Coarse    | Djadokhta   | Xanadu, Ukhaa Tolgod, south-central Mongolia                                | Norell et al. (1994; 2001)                        |
| <i>Citipati osmolskae</i>                                      | Clutch(es) with adult skeleton  | Coarse    | Djadokhta   | Ankylosaur Flats, Ukhaa Tolgod, Mongolia                                    | Clark et al. (1999); Grellet-Tinner et al. (2006) |
| <i>Nemegtomaia barsboldi</i>                                   | Clutch(es) with adult skeleton  | Coarse    | Baruungoyot | Northern Sayr of the Nemegt locality, Mongolia                              | Fanti et al. (2012)                               |
| <i>Oviraptor philoceratops</i><br>(cf. <i>Machairasaurus</i> ) | Clutch(es) with adult skeleton  | Coarse    | Djadokhta   | North Canyon, Bayan Mandahu, Inner Mongolia, China                          | Dong and Currie (1996)                            |
| Elongatoolithidae indet.                                       | Clutch(es) with embryonic bones | Fine      | Nemegt      | Bugin-Tsav, Gobi, Mongolia                                                  | Weishampel et al. (2008)                          |
| Faveoololithidae                                               |                                 |           |             |                                                                             |                                                   |
| <i>Faveoololithus ningxiaensis</i>                             | Clutch(es)                      | Coarse    | NA          | Bayinwulashan cahanaobao, Alxa Left Banner (Inner Mongolia), Ningxia, China | Zhao and Ding (1976); Zhang (2010)                |
| <i>F. ningxiaensis</i>                                         | Clutch(es)                      | Coarse    | Baruungoyot | Ologoy-Ulan-Tsav, Gobi, Mongolia                                            | Sochava (1969); Mikhailov (1994a)                 |

| Ootaxon/taxon                            | Material                                                     | Lithology | Formation | Locality                                       | References                                                             |
|------------------------------------------|--------------------------------------------------------------|-----------|-----------|------------------------------------------------|------------------------------------------------------------------------|
| <i>F. sp.</i>                            | Clutch(es)                                                   | Fine*     | Seonso    | Bosung County,<br>Chullanam-do, South<br>Korea | Huh and Zelenitsky<br>(2002); Kim et al.<br>(2009); Paik et al. (2004) |
| <i>Parafaveoololithus<br/>macroporus</i> | Clutch(es)                                                   | Fine      | Laijia    | Laijia Village, Tiantai,<br>Zhejiang, China    | Zhang (2010)                                                           |
| Faveoololithidae indet.                  | Clutch(es)                                                   | Coarse    | Shiwa     | Shiwa Bay, Whaseong,<br>Gyeonggi, South Korea  | Lee (2003)                                                             |
| Faveoololithidae indet.                  | Clutch(es)<br>(Locations 1-1 I5,<br>1-2, and 1-4)            | Fine      | Sihwa     | Hanyom, Sihwa Basin,<br>South Korea            | Kim et al. (2009)                                                      |
| Faveoololithidae indet.                  | Clutch(es)<br>(Location 3-1<br>Islets between)               | Fine      | Sihwa     | Hanyom, Sihwa Basin,<br>South Korea            | Kim et al. (2009)                                                      |
| Faveoololithidae indet.                  | Clutch(es)<br>(Locations 3-2 HH<br>and JH, 3-3, and 3-<br>4) | Coarse    | Sihwa     | Hanyom, Sihwa Basin,<br>South Korea            | Kim et al. (2009)                                                      |
| Faveoololithidae indet.                  | Clutch(es)<br>(Location 3-5)                                 | Coarse    | Sihwa     | Hanyom, Sihwa Basin,<br>South Korea            | Kim et al. (2009)                                                      |
| Faveoololithidae indet.                  | Clutch(es)<br>(Location 3-6)                                 | Coarse    | Sihwa     | Hanyom, Sihwa Basin,<br>South Korea            | Kim et al. (2009)                                                      |

| Ootaxon/taxon           | Material                                                       | Lithology | Formation | Locality                            | References        |
|-------------------------|----------------------------------------------------------------|-----------|-----------|-------------------------------------|-------------------|
| Faveoololithidae indet. | Clutch(es)<br>(Locations 4-1 JH,<br>4-2, 4-2, 4-3, and<br>4-4) | Coarse    | Sihwa     | Hanyom, Sihwa Basin,<br>South Korea | Kim et al. (2009) |
| Faveoololithidae indet. | Clutch(es)<br>(Location 4-5)                                   | Coarse    | Sihwa     | Hanyom, Sihwa Basin,<br>South Korea | Kim et al. (2009) |
| Faveoololithidae indet. | Clutch(es)<br>(Location 5-2)                                   | Coarse    | Sihwa     | Hanyom, Sihwa Basin,<br>South Korea | Kim et al. (2009) |
| Faveoololithidae indet. | Clutch(es)<br>(Location 5-3)                                   | Coarse    | Sihwa     | Hanyom, Sihwa Basin,<br>South Korea | Kim et al. (2009) |
| Faveoololithidae indet. | Clutch(es)<br>(Location 5-4)                                   | Coarse    | Sihwa     | Hanyom, Sihwa Basin,<br>South Korea | Kim et al. (2009) |
| Faveoololithidae indet. | Clutch(es)<br>(Locations 6-1 H<br>and 6-2)                     | Coarse    | Sihwa     | Hanyom, Sihwa Basin,<br>South Korea | Kim et al. (2009) |
| Faveoololithidae indet. | Clutch(es)<br>(Locations 6-3 and<br>6-4)                       | Coarse    | Sihwa     | Hanyom, Sihwa Basin,<br>South Korea | Kim et al. (2009) |
| Faveoololithidae indet. | Clutch(es)<br>(Location 6-5)                                   | Coarse    | Sihwa     | Hanyom, Sihwa Basin,<br>South Korea | Kim et al. (2009) |
| Faveoololithidae indet. | Clutch(es)                                                     | Coarse    | Sihwa     | Hanyom, Sihwa Basin,                | Kim et al. (2009) |

| Ootaxon/taxon           | Material                                          | Lithology | Formation  | Locality                                               | References                                                       |
|-------------------------|---------------------------------------------------|-----------|------------|--------------------------------------------------------|------------------------------------------------------------------|
|                         | (Location 6-6)                                    |           |            | South Korea                                            |                                                                  |
| Faveoololithidae indet. | Clutch(es)                                        | Coarse    | Sihwa      | Hanyom, Sihwa Basin,                                   | Kim et al. (2009)                                                |
|                         | (Location 6-7)                                    |           |            | South Korea                                            |                                                                  |
| Faveoololithidae indet. | Clutch(es)                                        | Coarse    | Sihwa      | Hanyom, Sihwa Basin,                                   | Kim et al. (2009)                                                |
|                         | (Location 6-8)                                    |           |            | South Korea                                            |                                                                  |
| Faveoololithidae indet. | Clutch(es)                                        | Coarse    | Sihwa      | Hanyom, Sihwa Basin,                                   | Kim et al. (2009)                                                |
|                         | (Location 6-9)                                    |           |            | South Korea                                            |                                                                  |
| Faveoololithidae indet. | Clutch(es)                                        | Coarse    | Sihwa      | Hanyom, Sihwa Basin,                                   | Kim et al. (2009)                                                |
|                         | (Location 9-1 D)                                  |           |            | South Korea                                            |                                                                  |
| Faveoololithidae indet. | Clutch(es)                                        | Coarse    | Sihwa      | Hanyom, Sihwa Basin,                                   | Kim et al. (2009)                                                |
|                         | (Location 9-2)                                    |           |            | South Korea                                            |                                                                  |
| Faveoololithidae indet. | Clutch(es)                                        | Coarse    | Sihwa      | Hanyom, Sihwa Basin,                                   | Kim et al. (2009)                                                |
|                         | (Location 9-3)                                    |           |            | South Korea                                            |                                                                  |
| Faveoololithidae indet. | Clutch(es)                                        | Coarse    | Sihwa      | Hanyom, Sihwa Basin,                                   | Kim et al. (2009)                                                |
|                         | (Location 9-4)                                    |           |            | South Korea                                            |                                                                  |
| Faveoololithidae indet. | Clutch(es)                                        | Coarse    | Haman      | Coast of Sinsudo Island,<br>Samcheonpo, South<br>Korea | Paik et al. (2012)                                               |
| Faveoololithidae indet. | Colonial nesting<br>ground (one of 5<br>horisons) | Coarse    | Los Llanos | Sanagasta, La Rioja,<br>Argentina                      | Grellet-Tinner and<br>Fiorelli (2010); Fiorelli<br>et al. (2012) |

| Ootaxon/taxon           | Material                                                             | Lithology | Formation  | Locality                                                                   | References                                                 |
|-------------------------|----------------------------------------------------------------------|-----------|------------|----------------------------------------------------------------------------|------------------------------------------------------------|
| Faveoololithidae indet. | Colonial nesting ground (one of 5 horizons)                          | Coarse*   | Los Llanos | Sanagasta, La Rioja, Argentina                                             | Grellet-Tinner and Fiorelli (2010); Fiorelli et al. (2012) |
| Faveoololithidae indet. | Colonial nesting ground (one of 5 horizons)                          | Coarse*   | Los Llanos | Sanagasta, La Rioja, Argentina                                             | Grellet-Tinner and Fiorelli (2010); Fiorelli et al. (2012) |
| Faveoololithidae indet. | Colonial nesting ground (one of 5 horizons)                          | Coarse*   | Los Llanos | Sanagasta, La Rioja, Argentina                                             | Grellet-Tinner and Fiorelli (2010); Fiorelli et al. (2012) |
| Faveoololithidae indet. | Colonial nesting ground (one of 5 horizons)                          | Coarse*   | Los Llanos | Sanagasta, La Rioja, Argentina                                             | Grellet-Tinner and Fiorelli (2010); Fiorelli et al. (2012) |
| Faveoololithidae indet. | Clutch(es) (Egg bed 3 of Salitral Ojo de Agua)                       | Coarse*   | Allen      | Arriagada I, Rio Negro, Argentina                                          | Salgado et al. (2007)                                      |
| Faveoololithidae indet. | Clutch(es) (Egg bed 2 of Salitral de Santa Rosa-Salinas de Trapalco) | Coarse*   | Allen      | Santos I, Salitral de Santa Rosa-Salinas de Trapalco, Rio Negro, Argentina | Salgado et al. (2007)                                      |
| Faveoololithidae indet. | Clutch(es) (Egg bed 3 of Salitral de                                 | Coarse*   | Allen      | Santos II and Berthe IV, Salitral de Santa Rosa-                           | Salgado et al. (2007)                                      |



| Ootaxon/taxon                                            | Material                                                   | Lithology | Formation | Locality                                                             | References             |
|----------------------------------------------------------|------------------------------------------------------------|-----------|-----------|----------------------------------------------------------------------|------------------------|
|                                                          | Santa Rosa-Salinas<br>de Trapalco)                         |           |           | Salinas de Trapalco, Rio<br>Negro, Argentina                         |                        |
| Faveoololithidae indet.                                  | Clutch(es)                                                 | Coarse    | NA        | Algui Ulan Tsav, Gobi,<br>Mongolia                                   | Watabe et al. (2010)   |
| Megaloolithidae                                          |                                                            |           |           |                                                                      |                        |
| <i>Megaloolithus<br/>balasinorensis<br/>(/baghensis)</i> | Clutch(es)                                                 | Coarse*   | Lameta    | Balasinor Quarry,<br>Jetholi and Dhuvadiya,<br>Kheda, Gujarat, India | Mohabey (1998)         |
| <i>M. dhoridungriensis</i>                               | Clutch(es) with<br>juvenile bones                          | Coarse*   | Lameta    | Dhoridungri, Gujarat,<br>India                                       | Mohabey (1998)         |
| <i>M. dhoridungriensis</i>                               | Clutch(es) with<br>hatchling bones                         | Coarse*   | Lameta    | Near Dhoridungri,<br>Gujarat, India                                  | Wilson et al. (2010)   |
| <i>M.<br/>khempurensis(/walpurens<br/>is?)</i>           | Clutch(es)                                                 | Coarse*   | Lameta    | Khempur and Werasa,<br>Kheda, Gujarat, India                         | Mohabey (1998)         |
| <i>M. mammilare</i>                                      | Clutch(es) (one of<br>multiple<br>stratigraphic<br>levels) | Fine      | NA        | Commune de Rousset,<br>near Cairanne, Aix-en-<br>Provence, France    | Williams et al. (1984) |
| <i>M. mammilare</i>                                      | Clutch(es) (one of<br>multiple                             | Fine      | NA        | Commune de<br>Chateauneuf Le Rouge,                                  | Williams et al. (1984) |

| Ootaxon/taxon                                 | Material                                                 | Lithology | Formation | Locality                                         | References                                                                       |
|-----------------------------------------------|----------------------------------------------------------|-----------|-----------|--------------------------------------------------|----------------------------------------------------------------------------------|
|                                               | stratigraphic levels)                                    |           |           | Aix-en-Provence, France                          |                                                                                  |
| <i>M. matleyi</i><br>( <i>jabalpurensis</i> ) | Clutch(es) (Site B)                                      | Coarse*   | Lameta    | Pavna, Chandrapur, Maharashtra, India            | Mohabey (1996; 1998)                                                             |
| <i>M. matleyi</i><br>( <i>jabalpurensis</i> ) | Nesting ground (Site A)                                  | Coarse*   | Lameta    | Pavna, Chandrapur, Maharashtra, India            | Mohabey (1996)                                                                   |
| <i>M. megadermus</i>                          | Clutch(es)                                               | Coarse*   | Lameta    | Dholidhanti and Paori, Dohad, Panchmahals, India | Mohabey (1998)                                                                   |
| <i>M. microtuberculata</i>                    | Clutch(es)                                               | Fine      | NA        | La Cairanne, Aix-en-Provence, France             | Garcia and Vianey-Liaud (2001); Vianey-Liaud et al. (2003)                       |
| <i>M. patagonicus</i><br>(Titanosauridae)     | Colonial nesting ground (Egg bed 3) with embryonic bones | Fine*     | Anacleto  | Auca Mahuevo, Neuquen, Patagonia, Argentina      | Chiappe et al. (1998; 2001); Grellet-Tinner et al. (2004); Jackson et al. (2013) |
| <i>M. patagonicus</i><br>(Titanosauridae)     | Colonial nesting ground (Egg bed 4)                      | Fine*     | Anacleto  | Auca Mahuevo, Neuquen, Patagonia, Argentina      | Chiappe et al. (2001; 2004)                                                      |
| <i>M. patagonicus</i><br>(Titanosauridae)     | Colonial nesting ground (Egg bed                         | Fine      | Anacleto  | Auca Mahuevo, Neuquen, Patagonia,                | Chiappe et al. (2001; 2004)                                                      |

| Ootaxon/taxon                                    | Material                            | Lithology | Formation    | Locality                                                               | References                             |
|--------------------------------------------------|-------------------------------------|-----------|--------------|------------------------------------------------------------------------|----------------------------------------|
|                                                  | 2)                                  |           |              | Argentina                                                              |                                        |
| <i>M. patagonicus</i><br>(Titanosauridae)        | Colonial nesting<br>ground (Egg bed | Fine      | Anacleto     | Auca Mahuevo,<br>Neuquen, Patagonia,<br>Argentina                      | Chiappe et al. (2001;<br>2004)         |
| <i>M. patagonicus</i><br>(Titanosauridae)        | 1)<br>Clutch(es)                    | Fine      | Rio Colorado | Gran Neuquen<br>neighbourhood,<br>Neuquen, Patagonia,<br>Argentina     | Calvo et al. (1997)                    |
| <i>M. phensaniensis</i><br>( <i>mohabeyi</i> )   | Clutch(es)                          | Coarse*   | Lameta       | Phensani, Balasinor,<br>Sonipur and Waniawao,<br>Kheda, Gujarat, India | Mohabey (1998)                         |
| <i>M. rahioliensis</i><br>( <i>cylindricus</i> ) | Clutch(es)                          | Coarse*   | Lameta       | Rahioli, Kheda, Gujarat,<br>India                                      | Mohabey (1998)                         |
| <i>M. siruguei</i>                               | Clutch(es) (Egg<br>horizon 1)       | Fine*     | Tremp        | Coll de Nargo, Lleida,<br>Catalonia, Spain                             | Jackson (2007); Vila et<br>al. (2010a) |
| <i>M. siruguei</i>                               | Clutch(es) (Egg<br>horizon 3)       | Fine*     | Tremp        | Coll de Nargo, Lleida,<br>Catalonia, Spain                             | Jackson (2007); Vila et<br>al. (2010a) |
| <i>M. siruguei</i>                               | Clutch(es) (Egg<br>horizon 5)       | Fine*     | Tremp        | Coll de Nargo, Lleida,<br>Catalonia, Spain                             | Jackson (2007); Vila et<br>al. (2010a) |
| <i>M. siruguei</i>                               | Clutch(es) (Egg<br>horizon 6)       | Coarse*   | Tremp        | Coll de Nargo, Lleida,<br>Catalonia, Spain                             | Jackson (2007); Vila et<br>al. (2010a) |

| Ootaxon/taxon      | Material                                          | Lithology | Formation | Locality                                                       | References                          |
|--------------------|---------------------------------------------------|-----------|-----------|----------------------------------------------------------------|-------------------------------------|
| <i>M. siruguei</i> | Clutch(es) (Egg horizon 7)                        | Coarse*   | Tremp     | Coll de Nargo, Lleida, Catalonia, Spain                        | Jackson (2007); Vila et al. (2010a) |
| <i>M. siruguei</i> | Clutch(es) (Egg horizon 8)                        | Coarse*   | Tremp     | Coll de Nargo, Lleida, Catalonia, Spain                        | Jackson (2007); Vila et al. (2010a) |
| <i>M. siruguei</i> | Clutch(es)                                        | Fine*     | Tremp     | Font del Bullidor, Vallcebre Syncline, Spain                   | Vila et al. (2010b)                 |
| <i>M. siruguei</i> | Clutch(es)                                        | Fine      | NA        | Commune de Fox-Amphoux, near Metisson, Aix-en-Provence, France | Williams et al. (1984)              |
| <i>M. siruguei</i> | Clutch(es) (one of multiple stratigraphic levels) | Fine*     | Tremp     | Coll de Nargo, Lleida, Catalonia, Spain                        | Sellés et al. (2013)                |
| <i>M. siruguei</i> | Clutch(es) (one of multiple stratigraphic levels) | Fine*     | Tremp     | Coll de Nargo, Lleida, Catalonia, Spain                        | Sellés et al. (2013)                |
| <i>M. siruguei</i> | Clutch(es) (one of multiple                       | Fine*     | Tremp     | Coll de Nargo, Lleida, Catalonia, Spain                        | Sellés et al. (2013)                |

| Ootaxon/taxon      | Material                                                   | Lithology | Formation | Locality                                   | References           |
|--------------------|------------------------------------------------------------|-----------|-----------|--------------------------------------------|----------------------|
|                    | stratigraphic<br>levels)                                   |           |           |                                            |                      |
| <i>M. siruguei</i> | Clutch(es) (one of<br>multiple<br>stratigraphic<br>levels) | Fine*     | Tremp     | Coll de Nargo, Lleida,<br>Catalonia, Spain | Sellés et al. (2013) |
| <i>M. siruguei</i> | Clutch(es) (one of<br>multiple<br>stratigraphic<br>levels) | Fine*     | Tremp     | Coll de Nargo, Lleida,<br>Catalonia, Spain | Sellés et al. (2013) |
| <i>M. siruguei</i> | Clutch(es) (one of<br>multiple<br>stratigraphic<br>levels) | Fine*     | Tremp     | Coll de Nargo, Lleida,<br>Catalonia, Spain | Sellés et al. (2013) |
| <i>M. siruguei</i> | Clutch(es) (one of<br>multiple<br>stratigraphic<br>levels) | Coarse    | Tremp     | Coll de Nargo, Lleida,<br>Catalonia, Spain | Sellés et al. (2013) |
| <i>M. siruguei</i> | Clutch(es) (one of<br>multiple<br>stratigraphic<br>levels) | Fine*     | Tremp     | Coll de Nargo, Lleida,<br>Catalonia, Spain | Sellés et al. (2013) |

| Ootaxon/taxon      | Material                                  | Lithology | Formation    | Locality                                | References                                 |
|--------------------|-------------------------------------------|-----------|--------------|-----------------------------------------|--------------------------------------------|
|                    | levels)                                   |           |              |                                         |                                            |
| <i>M. siruguei</i> | Clutch(es) (one of multiple stratigraphic | Fine*     | Tremp        | Coll de Nargo, Lleida, Catalonia, Spain | Sellés et al. (2013)                       |
|                    | levels)                                   |           |              |                                         |                                            |
| <i>M. siruguei</i> | Clutch(es) (one of multiple stratigraphic | Fine*     | Tremp        | Coll de Nargo, Lleida, Catalonia, Spain | Sellés et al. (2013)                       |
|                    | levels)                                   |           |              |                                         |                                            |
| <i>M. siruguei</i> | Clutch(es) (one of multiple stratigraphic | Fine*     | Tremp        | Coll de Nargo, Lleida, Catalonia, Spain | Sellés et al. (2013)                       |
|                    | levels)                                   |           |              |                                         |                                            |
| <i>M. siruguei</i> | Clutch(es) (one of multiple stratigraphic | Coarse    | Tremp        | Coll de Nargo, Lleida, Catalonia, Spain | Sellés et al. (2013)                       |
|                    | levels)                                   |           |              |                                         |                                            |
| <i>M. siruguei</i> | Clutch(es)                                | Fine      | Tremp        | Biscarri, Isona, Lleida, Spain          | Lopez-Martinez et al. (2000)               |
| <i>M. siruguei</i> | Clutch(es) (C1 nesting horizon)           | Fine*     | Densus-Ciula | Tustea, Hateg Basin, Romania            | Grigorescu et al. (1994, 2010); Grigorescu |

| Ootaxon/taxon          | Material                        | Lithology | Formation    | Locality                            | References                                                                         |
|------------------------|---------------------------------|-----------|--------------|-------------------------------------|------------------------------------------------------------------------------------|
|                        |                                 |           |              |                                     | (2016); Botfalvai et al. (2017)                                                    |
| <i>M. siruguei</i>     | Clutch(es) (C2 nesting horizon) | Fine*     | Densus-Ciula | Tustea, Hateg Basin, Romania        | Grigorescu et al. (1994, 2010); Grigorescu (2016); Botfalvai et al. (2017)         |
| <i>M. cf. siruguei</i> | Clutch(es) (Horizon E)          | Fine*     | Sanpetru     | Totesti-baraj, Hateg Basin, Romania | Codrea et al. (2002); Grigorescu et al. (1994; 2010); Grellet-Tinner et al. (2012) |
| <i>M. cf. siruguei</i> | Clutch(es) (Horizon A)          | Fine*     | Sanpetru     | Totesti-baraj, Hateg Basin, Romania | Codrea et al. (2002); Grigorescu et al. (1994; 2010); Grellet-Tinner et al. (2012) |
| <i>M. cf. siruguei</i> | Clutch(es) (Horizon K)          | Fine*     | Sanpetru     | Totesti-baraj, Hateg Basin, Romania | Codrea et al. (2002); Grigorescu et al. (1994; 2010); Grellet-Tinner et al. (2012) |
| <i>M. cf. siruguei</i> | Clutch(es) (Horizon B)          | Fine*     | Sanpetru     | Totesti-baraj, Hateg Basin, Romania | Codrea et al. (2002); Grigorescu et al. (1994; 2010); Grellet-Tinner et            |

| Ootaxon/taxon          | Material                         | Lithology | Formation | Locality                            | References                                                                         |
|------------------------|----------------------------------|-----------|-----------|-------------------------------------|------------------------------------------------------------------------------------|
|                        |                                  |           |           |                                     | al. (2012)                                                                         |
| <i>M. cf. siruguei</i> | Clutch(es)<br>(Horizons G and H) | Fine*     | Sanpetru  | Totesti-baraj, Hateg Basin, Romania | Codrea et al. (2002); Grigorescu et al. (1994; 2010); Grellet-Tinner et al. (2012) |
| <i>M. cf. siruguei</i> | Clutch(es) (Find 8)              | Fine*     | Sanpetru  | Nalat-Vad, Hateg Basin, Romania     | Smith et al. (2002); Grigorescu et al. (1994; 2010)                                |
| <i>M. cf. siruguei</i> | Clutch(es) (Find 9)              | Fine*     | Sanpetru  | Nalat-Vad, Hateg Basin, Romania     | Smith et al. (2002); Grigorescu et al. (1994; 2010)                                |
| <i>M. cf. siruguei</i> | Clutch(es) (Find 2)              | Fine*     | Sanpetru  | Nalat-Vad, Hateg Basin, Romania     | Smith et al. (2002); Grigorescu et al. (1994; 2010)                                |
| <i>M. cf. siruguei</i> | Clutch(es) (Find 6)              | Fine      | Sanpetru  | Nalat-Vad, Hateg Basin, Romania     | Smith et al. (2002); Grigorescu et al. (1994; 2010)                                |
| <i>M. cf. siruguei</i> | Clutch(es) (Find 7)              | Coarse*   | Sanpetru  | Nalat-Vad, Hateg Basin, Romania     | Smith et al. (2002); Grigorescu et al. (1994; 2010)                                |
| <i>M. sp.</i>          | Clutch(es)                       | Coarse*   | Lameta    | Salbardi, District                  | Srivastava and Mankar                                                              |



| Ootaxon/taxon | Material                   | Lithology | Formation         | Locality                                                                             | References                                                                   |
|---------------|----------------------------|-----------|-------------------|--------------------------------------------------------------------------------------|------------------------------------------------------------------------------|
|               |                            |           |                   | Amravati, Maharashtra<br>and Betul, India                                            | (2015)                                                                       |
| <i>M. sp.</i> | Colonial nesting<br>ground | Coarse    | Aren<br>Sandstone | Barranc de la Costa<br>Gran, Basturs, Tremp<br>syncline, southern<br>Pyrenees, Spain | Sanz et al. (1995);<br>Sander et al. (1998);<br>Diaz-Molina et al.<br>(2007) |
| <i>M. sp.</i> | Clutch(es)<br>(Horizon 1)  | Fine      | Tremp             | Coll de Nargo, Lleida,<br>Catalonia, Spain                                           | Sander et al. (1998);<br>Peitz (2001)                                        |
| <i>M. sp.</i> | Clutch(es)<br>(Horizon 2)  | Fine      | Tremp             | Coll de Nargo, Lleida,<br>Catalonia, Spain                                           | Sander et al. (1998);<br>Peitz (2001)                                        |
| <i>M. sp.</i> | Clutch(es)<br>(Horizon 3)  | Fine      | Tremp             | Coll de Nargo, Lleida,<br>Catalonia, Spain                                           | Sander et al. (1998);<br>Peitz (2001)                                        |
| <i>M. sp.</i> | Clutch(es)<br>(Horizon 4)  | Fine      | Tremp             | Coll de Nargo, Lleida,<br>Catalonia, Spain                                           | Sander et al. (1998);<br>Peitz (2001)                                        |
| <i>M. sp.</i> | Clutch(es)<br>(Horizon 5)  | Fine      | Tremp             | Coll de Nargo, Lleida,<br>Catalonia, Spain                                           | Sander et al. (1998);<br>Peitz (2001)                                        |
| <i>M. sp.</i> | Clutch(es)<br>(Horizon 6)  | Fine      | Tremp             | Coll de Nargo, Lleida,<br>Catalonia, Spain                                           | Sander et al. (1998);<br>Peitz (2001)                                        |
| <i>M. sp.</i> | Clutch(es)<br>(Horizon 7)  | Fine      | Tremp             | Coll de Nargo, Lleida,<br>Catalonia, Spain                                           | Sander et al. (1998);<br>Peitz (2001)                                        |
| <i>M. sp.</i> | Clutch(es)                 | Fine*     | Densus-Ciula      | Tustea, Hateg Basin,                                                                 | Venczel et al. (2015)                                                        |

| Ootaxon/taxon                                               | Material                                                                            | Lithology | Formation                             | Locality                                                                             | References                                                |
|-------------------------------------------------------------|-------------------------------------------------------------------------------------|-----------|---------------------------------------|--------------------------------------------------------------------------------------|-----------------------------------------------------------|
|                                                             |                                                                                     |           |                                       | Romania                                                                              |                                                           |
| <i>M. sp.</i> (Type 2A:<br>probably <i>M. patagonicus</i> ) | Clutch(es) (Egg<br>level 3 of Salitral<br>de Santa Rosa-<br>Salinas de<br>Trapalco) | Coarse*   | Allen                                 | Berthe IV, Salitral de<br>Santa Rosa-Salinas de<br>Trapalco, Rio Negro,<br>Argentina | Salgado et al. (2007;<br>2009)                            |
| Megaloolithidae indet.                                      | Clutch(es)                                                                          | Coarse*   | Allen                                 | Bajo de Arriagada,<br>Patagonia, Rio Negro,<br>Argentina                             | Genise and Sarzetti<br>(2011)                             |
| Megaloolithidae indet.<br>(Type 2B)                         | Clutch(es) (Egg<br>level 2 of Salitral<br>Ojo de Agua)                              | Coarse    | Allen                                 | Arrigada III, Salitral<br>Ojo de Agua, Rio<br>Negro, Argentina                       | Salgado et al. (2007)                                     |
| Megaloolithidae indet.                                      | Clutch(es)                                                                          | Coarse    | Allen                                 | Arrigada III, Rio Negro,<br>Argentina                                                | Salgado et al. (2007)                                     |
| Megaloolithidae indet.                                      | Clutch(es)                                                                          | Coarse    | Los Llanos                            | Tama, Sierra de Los<br>Llanos, La Rioja,<br>Argentina                                | Hechenleitner et al.<br>(2016); Basilici et al.<br>(2017) |
| " <i>Hypselosaurus<br/>priscus</i> "                        | Colonial nesting<br>ground                                                          | Fine      | NA (Marines<br>Rouges<br>Inferieures) | Rennes-le-chateau, Aude,<br>France                                                   | Cousin et al. (1989)                                      |
| Montanoolithidae                                            |                                                                                     |           |                                       |                                                                                      |                                                           |

| Ootaxon/taxon                                                  | Material                        | Lithology | Formation    | Locality                                                        | References                                          |
|----------------------------------------------------------------|---------------------------------|-----------|--------------|-----------------------------------------------------------------|-----------------------------------------------------|
| <i>Montanoolithus strongorum</i>                               | Clutch(es)                      | Coarse*   | Two Medicine | Blackfeet Reservation, Montana, USA                             | Zelenitsky and Therrien (2008b)                     |
| Ovaloolithidae                                                 |                                 |           |              |                                                                 |                                                     |
| <i>Ovaloolithus</i> sp.                                        | Clutch(es)                      | Fine      | Chichengshan | Ganjiechang, Tiantai, Zhejiang, China                           | Fang et al. (2000)                                  |
| Ovaloolithidae indet.                                          | Clutch(es)                      | Fine*     | Hasandong    | Sumunri, Geumseong-myeon, Hadong, South Gyeongsang, South Korea | Lee (2003); Yun and Yang (1997); Paik et al. (2012) |
| <i>Preprismatoolithus</i>                                      |                                 |           |              |                                                                 |                                                     |
| <i>Preprismatoolithus coloradensis</i> ( <i>Allosaurus</i> )   | Clutch(es)                      | Fine      | Morrison     | Young Locality, Delta County, Colorado, USA                     | Hirsch (1994)                                       |
| <i>Preprismatoolithus</i> ( <i>Lourinhanosaurus antunesi</i> ) | Clutch(es) with embryonic bones | Fine      | Lourinha     | Pai Mogo, Lourinha, Estramadur, Portugal                        | Mateus et al. (1997); Antunes et al. (1998)         |
| Prismatoolithidae                                              |                                 |           |              |                                                                 |                                                     |
| <i>Prismatoolithus gebiensis</i>                               | Clutch(es)                      | Fine      | Gaogou       | Xixia Basin, Henan, China                                       | Wang and Zhou (1995)                                |
| <i>P. gebiensis</i>                                            | Clutch(es)                      | Fine      | Djadokhta    | Bayan Mandahu, Urad Houqi, Inner Mongolia,                      | Zhao and Li (1993)                                  |

| Ootaxon/taxon                          | Material   | Lithology | Formation    | Locality                                                                                                        | References                                                     |
|----------------------------------------|------------|-----------|--------------|-----------------------------------------------------------------------------------------------------------------|----------------------------------------------------------------|
| <i>P. heyuanensis</i>                  | Clutch(es) | Coarse    | Dongyuan     | China<br>Fengguang Village of<br>Yuannan Town,<br>Yuancheng District,<br>Heyuan, Guangdong,<br>China            | Lü et al. (2006); Tanaka<br>et al. (2012)                      |
| <i>P. jenseni</i>                      | Clutch(es) | Coarse    | North Horn   | Sauropod Locality,<br>Emery County, Utah,<br>USA                                                                | Jensen (1966); Bray<br>(1999)                                  |
| <i>P. levis (Troodon<br/>formosus)</i> | Clutch(es) | Fine      | Oldman       | New Egg Site, Devil's<br>Coulee, Alberta, Canada                                                                | Zelenitsky and Hills<br>(1996); this study (TMP<br>1994.179.1) |
| <i>P. levis (Troodon<br/>formosus)</i> | Clutch(es) | Fine*     | Oldman       | North Baby Butte,<br>Devil's Coulee, Alberta,<br>Canada                                                         | This study (TMP<br>1996.86.1)                                  |
| <i>P. levis (Troodon<br/>formosus)</i> | Clutch(es) | Fine*     | Two Medicine | Egg Mountain, Willow<br>Creek Anticline and the<br>Red Rock Locality,<br>Choteau, Teton County,<br>Montana, USA | Varricchio et al. (1997;<br>1999; 2002)                        |
| <i>P. levis (Troodon</i>               | Clutch(es) | Fine      | Two Medicine | Unnamed site, Willow                                                                                            | Varricchio et al. (2002;                                       |

| Ootaxon/taxon                        | Material   | Lithology | Formation    | Locality                                                                                                | References                |
|--------------------------------------|------------|-----------|--------------|---------------------------------------------------------------------------------------------------------|---------------------------|
| <i>formosus</i> )                    |            |           |              | Creek Anticline and the Red Rock Locality, Choteau, Teton County, Montana; Glacier County, Montana, USA | 2015)                     |
| <i>P. tiantaiensis</i>               | Clutch(es) | Fine      | Chichengshan | Tiantai Basin, Zhejiang, China                                                                          | Qian et al. (2008)        |
| <i>Protoceratopsidovum fluxuosum</i> | Clutch(es) | Coarse    | Barun-Goyot  | Khermin-Tsav, Gobi, Mongolia                                                                            | Mikhailov (1994b)         |
| <i>P. minimum</i>                    | Clutch(es) | Coarse    | Djadokhta    | Baga-Tariach, Gobi, Mongolia                                                                            | Mikhailov (1994b)         |
| <i>P. sincerum</i>                   | Clutch(es) | Coarse    | Djadokhta    | Bain-Dzak, Gobi, Mongolia                                                                               | Mikhailov (1994b)         |
| <i>P. sincerum</i>                   | Clutch(es) | Coarse    | Djadokhta    | Main Field, Bain-Dzak, Gobi, Mongolia                                                                   | Sabath (1991)             |
| <i>P. sincerum</i>                   | Clutch(es) | Coarse    | Djadokhta    | Dashzeveg Sayr, Bain-Dzak, Gobi, Mongolia                                                               | Sabath (1991)             |
| <i>P. sp.</i>                        | Clutch(es) | Coarse*   | Djadokhta    | Zhinst Tolgoi, Udyn Sayr, Gobi, Mongolia                                                                | Suzuki and Watabe (2000a) |
| <i>P. sp.</i>                        | Clutch(es) | Coarse    | Djadokhta    | Bain-Dzak, Gobi, Mongolia                                                                               | Suzuki and Watabe (2000b) |

| Ootaxon/taxon                                  | Material                                                         | Lithology | Formation        | Locality                                                               | References                                                             |
|------------------------------------------------|------------------------------------------------------------------|-----------|------------------|------------------------------------------------------------------------|------------------------------------------------------------------------|
| <i>P. sp.</i>                                  | Clutch(es)                                                       | Coarse    | Djadokhta        | Tugrikin Shire, Gobi,<br>Mongolia                                      | Watabe et al. (2010)                                                   |
| <i>Sankofa pyrenaica</i>                       | Clutch(es)                                                       | Coarse    | Aren             | Serrat Pedrego, Montsec<br>area, Lleida, Catalonia,<br>Spain           | Lopez-Martinez and<br>Vicens (2012)                                    |
| <i>Prismatoolithus sp.</i>                     | Clutch(es)                                                       | Fine*     | Oldman           | Little Diablo's Hill and<br>Saddle, Devil's Coulee,<br>Alberta, Canada | This study (TMP<br>2008.75.51)                                         |
| <i>P. levis (Troodon<br/>formosus)</i>         | Clutch(es) with<br>embryonic bones                               | Fine*     | Two Medicine     | Egg Island, Choteau,<br>Teton County, Montana,<br>USA                  | Varricchio et al. (2002)                                               |
| Spheroolithidae                                |                                                                  |           |                  |                                                                        |                                                                        |
| <i>Paraspheroolithus<br/>sanwangbacunensis</i> | Clutch(es)                                                       | Coarse    | Dongyuan         | Heyuan Basin,<br>Guangdong, China                                      | Fang et al. (2005)                                                     |
| <i>Spheroolithus<br/>spheroides</i>            | Clutch(es)                                                       | Fine      | Wangshi<br>Group | Near Chinkongkou and<br>Tsotan, Laiyang,<br>Shangdong, China           | Chow (1951; 1954)                                                      |
| <i>S. sp.</i>                                  | Clutch(es) (one<br>from at least two<br>stratigraphic<br>levels) | Fine*     | Seonso           | Bosung County,<br>Chullanam-do, South<br>Korea                         | Huh and Zelenitsky<br>(2002); Kim et al.<br>(2009); Paik et al. (2004) |

| Ootaxon/taxon                   | Material                                                | Lithology | Formation    | Locality                                       | References                                                           |
|---------------------------------|---------------------------------------------------------|-----------|--------------|------------------------------------------------|----------------------------------------------------------------------|
| <i>S. sp.</i>                   | Clutch(es) (one from at least two stratigraphic levels) | Fine*     | Seonso       | Bosung County, Chullanam-do, South Korea       | Huh and Zelenitsky (2002); Kim et al. (2009); Paik et al. (2004)     |
| Spheroolithidae indet.          | Clutch(es) (Site 2-lower horizon)                       | Fine      | Goseong      | Goseong, South Korea                           | Paik et al. (2012)                                                   |
| Spheroolithidae indet.          | Clutch(es) (Site 3)                                     | Fine*     | Goseong      | Goseong, South Korea                           | Paik et al. (2012)                                                   |
| Spheroolithidae indet.          | Clutch(es) (Site 4)                                     | Fine      | Goseong      | Goseong, South Korea                           | Paik et al. (2012)                                                   |
| Spheroolithidae indet.          | Clutch(es)                                              | Coarse    | Barungoyot   | Shiluut Ula, Gobi, Mongolia                    | Watabe et al. (2010)                                                 |
| Spheroolithidae indet.          | Clutch(es)                                              | Coarse*   | Djadokhta    | Dzamin Khond, Gobi, Mongolia                   | Watabe et al. (2010)                                                 |
| <i>Maiasaura peeblesorum</i>    | Colonial nesting ground                                 | Fine*     | Two Medicine | Choteau, Teton County, Montana, USA            | Horner and Makela (1979); Horner (1982)                              |
| <i>Hypacrosaurus stebingeri</i> | Clutch(es)                                              | Fine*     | Two Medicine | Blacktail Creek, Glacier County, Montana, USA  | Horner and Currie (1994)                                             |
| <i>H. stebingeri</i>            | Clutch(es) (one of multiple stratigraphic levels)       | Fine*     | Oldman       | Diablo's Hill, Devil's Coulee, Alberta, Canada | Horner and Currie (1994); this study (TMP 1989.79.53; TMP1988.79.36) |
| <i>H. stebingeri</i>            | Clutch(es) (one of                                      | Fine*     | Oldman       | Diablo's Hill, Devil's                         | This study (TMP                                                      |

| Ootaxon/taxon                     | Material                          | Lithology | Formation    | Locality                                                                                                      | References                                                          |
|-----------------------------------|-----------------------------------|-----------|--------------|---------------------------------------------------------------------------------------------------------------|---------------------------------------------------------------------|
|                                   | multiple stratigraphic levels)    |           |              | Coulee, Alberta, Canada                                                                                       | 1997.63.1)                                                          |
| Youngoolithidae                   |                                   |           |              |                                                                                                               |                                                                     |
| <i>Youngoolithus xiaguanensis</i> | Clutch(es)                        | Fine      | NA           | Xianguan Basin, Neixiang County, Henan, China                                                                 | Zhao (1979); Zhang (2010)                                           |
| Oofamily incertae sedis           |                                   |           |              |                                                                                                               |                                                                     |
| <i>Continuoolithus canadensis</i> | Clutch(es)                        | Fine*     | Two Medicine | Flaming Cliff locality, Willow Creek Anticline and the Red Rock Locality, Choteau, Teton County, Montana, USA | Jackson et al. (2015)                                               |
| <i>Massospondylus carinatus</i>   | Clutch(es) (one of four horisons) | Fine*     | Upper Elliot | Golden Gate Highlands National Park, South Africa                                                             | Kitching (1979); Zelenitsky and Modesto (2002); Reisz et al. (2012) |
| <i>M. carinatus</i>               | Clutch(es) (one of four horisons) | Fine*     | Upper Elliot | Golden Gate Highlands National Park, South Africa                                                             | Kitching (1979); Zelenitsky and Modesto (2002); Reisz et al. (2012) |



| Ootaxon/taxon                      | Material                          | Lithology | Formation    | Locality                                          | References                                                          |
|------------------------------------|-----------------------------------|-----------|--------------|---------------------------------------------------|---------------------------------------------------------------------|
| <i>M. carinatus</i>                | Clutch(es) (one of four horisons) | Fine*     | Upper Elliot | Golden Gate Highlands National Park, South Africa | Kitching (1979); Zelenitsky and Modesto (2002); Reisz et al. (2012) |
| <i>M. carinatus</i>                | Clutch(es) (one of four horisons) | Fine*     | Upper Elliot | Golden Gate Highlands National Park, South Africa | Kitching (1979); Zelenitsky and Modesto (2002); Reisz et al. (2012) |
| Multicanalicate eggs               | Clutch(es)                        | Coarse*   | Mercedes     | Soriano, Uruguay                                  | Faccio (1994)                                                       |
| <i>Protoceratops andrewsi</i> eggs | Clutch(es)                        | Fine      | Djadokhta    | Ukhaa Tolgod, Mongolia                            | Erickson et al. (2017)                                              |
| Indeterminate dinosaur eggs        | Clutch(es)                        | Coarse    | Jindong      | Goseong, South Korea                              | Lee (2003)                                                          |

**Supplementary Table S4. Lithology of dinosaur eggs and eggshells that are unlikely in-situ (assumedly ex-situ).**

Note that \* indicates that additional lithologic data were retrieved from the collection database at the Royal Tyrrell Museum of Palaeontology, Drumheller, Canada. Abbreviation: NA, not available.

| Ootaxon/taxon                                                               | Material                                                     | Lithology | Formation                            | Locality                                                                 | References                |
|-----------------------------------------------------------------------------|--------------------------------------------------------------|-----------|--------------------------------------|--------------------------------------------------------------------------|---------------------------|
| <b>Arriagadoolithidae</b>                                                   |                                                              |           |                                      |                                                                          |                           |
| <i>Arriagadoolithus patagoniensis</i><br>( <i>Bonapartenykus ultimus?</i> ) | Isolated egg(s) with<br><i>Bonapartenykus</i><br>bones       | Coarse    | Allen                                | Salitral Ojo de Agua,<br>North Patagonia,<br>Argentina                   | Agnolin et al. (2012)     |
| <i>A. patagoniensis</i>                                                     | Eggshell(s) (Egg<br>level 2 of Salitral<br>Ojo de Agua)      | Coarse    | Allen                                | Arrigada III, Salitral<br>Ojo de Agua, Rio<br>Negro, Argentina           | Salgado et al. (2007)     |
| <i>Triprismatoolithus</i> sp.                                               | Eggshell(s)                                                  | Coarse    | Milk River                           | Verdigris Coulee,<br>Alberta, Canada                                     | Zelenitsky et al. (2017a) |
| <b>Cairanoolithidae</b>                                                     |                                                              |           |                                      |                                                                          |                           |
| <i>Cairanoolithus dughii</i>                                                | Eggshell(s)                                                  | Fine      | Red Marls<br>of Maurine<br>Formation | Les Boudous and<br>Gourg de l'Encantado,<br>Upper Aude Valley,<br>France | Fondevilla et al. (2016)  |
| <i>C. cf. roussetensis</i>                                                  | Isolated egg(s) (one<br>of multiple<br>stratigraphic levels) | Fine      | Tremp                                | Coll de Nargo, Lleida,<br>Catalonia, Spain                               | Sellés et al. (2013)      |

| Ootaxon/taxon                          | Material                                               | Lithology | Formation             | Locality                                  | References            |
|----------------------------------------|--------------------------------------------------------|-----------|-----------------------|-------------------------------------------|-----------------------|
| <i>C. cf. roussetensis</i>             | Isolated egg(s) (one of multiple stratigraphic levels) | Fine      | Tremp                 | Coll de Nargo, Lleida, Catalonia, Spain   | Sellés et al. (2013)  |
| Dendroolithidae<br>(/Phaceloolithidae) |                                                        |           |                       |                                           |                       |
| <i>Dendroolithus dendriticus</i>       | Eggshell(s)                                            | Fine      | Zhaoying              | Xinping-Chimei Basin, Xixia, Henan, China | Fang et al. (2007)    |
| Phaceloolithidae indet.                | Isolated egg(s)                                        | Coarse    | Lourinha              | Porto das Barcas, near Lourinha, Portugal | Ribeiro et al. (2014) |
| Dendroolithidae indet.                 | Eggshell(s)                                            | Coarse    | Barungoyot/<br>Nemegt | Khermeen Tsav, Gobi, Mongolia             | Watabe et al. (2010)  |
| Dendroolithidae indet.                 | Eggshell(s)                                            | Coarse    | ?Nemegt               | Yagaan Khovil, Gobi, Mongolia             | Watabe et al. (2010)  |
| Elongatoolithidae                      |                                                        |           |                       |                                           |                       |
| <i>Elongatoolithus andrewsi</i>        | Eggshell(s) (one of multiple stratigraphic levels)     | Fine      | Zhutian               | Nanxiong Basin, Guangdong, China          | Fang et al. (2009)    |
| <i>E. andrewsi</i>                     | Eggshell(s) (one of multiple stratigraphic levels)     | Fine      | Zhutian               | Nanxiong Basin, Guangdong, China          | Fang et al. (2009)    |

| Ootaxon/taxon                   | Material                                           | Lithology | Formation                           | Locality                                                   | References                |
|---------------------------------|----------------------------------------------------|-----------|-------------------------------------|------------------------------------------------------------|---------------------------|
| <i>E. andrewsi</i>              | Eggshell(s) (one of multiple stratigraphic levels) | Fine      | Zhutian                             | Nanxiong Basin, Guangdong, China                           | Fang et al. (2009)        |
| <i>E. sp.</i>                   | Eggshell(s)                                        | Fine      | Fenshuiiao                          | Western Dongting Basin, Hunan, China                       | Zeng and Zhang (1979)     |
| <i>E. sp.</i>                   | Eggshell(s)                                        | Coarse    | ?Djadokhta                          | Toosgot area, Abdrant Nuru, Gobi, Mongolia                 | Watabe (2004)             |
| <i>E. sp.</i>                   | Eggshell(s)                                        | Fine      | 'Lower Formation' of Sasayama Group | Kamitaki, Tamba, Hyogo, Japan                              | Tanaka et al. (2016)      |
| <i>E. sp.</i>                   | Eggshell(s)                                        | Coarse    | Nemegt                              | Khaichin Ula, Gobi, Mongolia                               | Suzuki and Watabe (2000b) |
| <i>Macroelongatoolithus sp.</i> | Eggshell fragments                                 | Coarse    | Wayan                               | Robinson Bonebed (IMNH2251), Bonneville County, Idaho, USA | Krumenacker et al. (2016) |
| <i>Macroelongatoolithus sp.</i> | Eggshell fragments                                 | Fine      | Wayan                               | Brockman Creek (IMNH2427), Bonneville County, Idaho, USA   | Krumenacker et al. (2016) |

| Ootaxon/taxon                              | Material           | Lithology | Formation              | Locality                                                           | References                                                 |
|--------------------------------------------|--------------------|-----------|------------------------|--------------------------------------------------------------------|------------------------------------------------------------|
| <i>Macroelongatoolithus</i> sp.            | Eggshell fragments | Fine      | Wayan                  | Jackknife Creek<br>(IMNH2428),<br>Bonneville County,<br>Idaho, USA | Krumenacker et al.<br>(2016)                               |
| <i>Macroolithus yaotunensis</i>            | Isolated egg(s)    | Fine      | Pingling               | Datang, Nanxiong<br>Basin, Guangdong,<br>China                     | Zhao et al. (2002)                                         |
| <i>Megafusoolithus<br/>qiaoxiaensis</i>    | Isolated egg(s)    | Fine      | Chichengshan           | Shuangtang, Tiantai<br>Basin, Zhejiang,<br>China                   | Wang et al. (2010)                                         |
| <i>Paraelongatoolithus<br/>reticulatus</i> | Isolated egg(s)    | Fine      | Chichengshan           | Chengguan, Tiantai<br>Basin, Zhejiang,<br>China                    | Wang et al. (2010)                                         |
| <i>Trachoolithus faticanus</i>             | Eggshell(s)        | Fine      | Dushi Ula<br>(Doshuul) | Buylyasutuin-<br>Khuduk, Ubur-<br>Khangay, Mongolia                | Kurzanov and Mikhailov<br>(1989); Mikhailov<br>(1994b)     |
| Elongatoolithidae indet.                   | Eggshell(s)        | Fine      | Quipa                  | Luanchuan, Tantou<br>Basin, Henan, China                           | Xu (2007); Tanaka et al.<br>(2011); Jiang et al.<br>(2011) |
| Elongatoolithidae indet.                   | Isolated egg(s)    | Fine      | Dadaepo                | Busan, South Korea                                                 | Paik et al. (2012)                                         |
| Elongatoolithidae indet.                   | Eggshell(s)        | Fine      | Blesa                  | La Cantalera, Teruel,                                              | Canudo et al. (2010)                                       |

| Ootaxon/taxon            | Material                      | Lithology | Formation             | Locality                            | References                   |
|--------------------------|-------------------------------|-----------|-----------------------|-------------------------------------|------------------------------|
|                          |                               |           |                       | Spain                               |                              |
| Elongatoolithidae indet. | Eggshell(s)                   | Coarse    | Djadokhta             | Dzamin Khond, Gobi,<br>Mongolia     | Suzuki and Watabe<br>(2000b) |
| Elongatoolithidae indet. | Eggshell(s)                   | Coarse    | Djadokhta             | Bayn Dzak, Gobi,<br>Mongolia        | Suzuki and Watabe<br>(2000b) |
| Elongatoolithidae indet. | Eggshell(s)                   | Coarse    | Djadokhta             | Mongot, Gobi,<br>Mongolia           | Suzuki and Watabe<br>(2000b) |
| Elongatoolithidae indet. | Isolated egg(s)               | Coarse    | Nemegt                | Bugin Tsav, Gobi,<br>Mongolia       | Watabe et al. (2010)         |
| Elongatoolithidae indet. | Isolated egg(s)<br>(Red Beds) | Coarse    | Barungoyot/<br>Nemegt | Khermeen Tsav, Gobi,<br>Mongolia    | Watabe et al. (2010)         |
| Elongatoolithidae indet. | Eggshell(s) (White<br>Beds)   | Coarse    | Barungoyot/<br>Nemegt | Khermeen Tsav, Gobi,<br>Mongolia    | Watabe et al. (2010)         |
| Elongatoolithidae indet. | Eggshell(s)                   | Coarse    | Nemegt                | Khermeen Tsav-II,<br>Gobi, Mongolia | Watabe et al. (2010)         |
| Elongatoolithidae indet. | Eggshell(s)                   | Fine      | Nemegt                | Shar Tsav, Gobi,<br>Mongolia        | Watabe et al. (2010)         |
| Elongatoolithidae indet. | Eggshell(s)                   | Coarse    | Djadokhta             | Tugrikin Shire, Gobi,<br>Mongolia   | Watabe et al. (2010)         |
| Elongatoolithidae indet. | Eggshell(s)                   | Coarse    | Djadokhta             | Dzamin Khond, Gobi,<br>Mongolia     | Watabe et al. (2010)         |

| Ootaxon/taxon                            | Material                           | Lithology | Formation | Locality                                                              | References                                                             |
|------------------------------------------|------------------------------------|-----------|-----------|-----------------------------------------------------------------------|------------------------------------------------------------------------|
| Elongatoolithidae indet.                 | Eggshell(s)                        | Coarse    | Djadokhta | Bortolgoi, Gobi,<br>Mongolia                                          | Watabe et al. (2010)                                                   |
| Elongatoolithidae indet.                 | Eggshell(s)                        | Coarse    | ?Nemegt   | Yagaan Khovil, Gobi,<br>Mongolia                                      | Watabe et al. (2010)                                                   |
| Faveoololithidae                         |                                    |           |           |                                                                       |                                                                        |
| <i>Faveoololithus</i> sp.                | Isolated egg(s)                    | Fine      | Seonso    | Bosung County,<br>Chullanam-do, South<br>Korea                        | Huh and Zelenitsky<br>(2002); Kim et al.<br>(2009); Paik et al. (2004) |
| <i>F.</i> sp.                            | Isolated egg(s)                    | Fine      | Seonso    | Bosung County,<br>Chullanam-do, South<br>Korea                        | Huh and Zelenitsky<br>(2002); Kim et al.<br>(2009); Paik et al. (2004) |
| <i>Parafaveoololithus<br/>microporus</i> | Isolated egg(s)                    | Fine      | Laijia    | Fangshan, Tiantai,<br>Zhejiang, China                                 | Zhang (2010)                                                           |
| <i>Sphaerovum erbei</i>                  | Eggshell(s)                        | Coarse    | Asencio   | Colonia, 12a. Police<br>Section, stream<br>Miguelete Tala,<br>Uruguay | Mones (1980)                                                           |
| Faveoololithidae indet.                  | Isolated egg(s)<br>(Location 1-3)  | Fine      | Sihwa     | Hanyom, Sihwa<br>Basin, South Korea                                   | Kim et al. (2009)                                                      |
| Faveoololithidae indet.                  | Isolated egg(s)<br>(Location 2 HH) | Fine      | Sihwa     | Hanyom, Sihwa<br>Basin, South Korea                                   | Kim et al. (2009)                                                      |

| Ootaxon/taxon           | Material                                                                             | Lithology | Formation | Locality                                                                             | References            |
|-------------------------|--------------------------------------------------------------------------------------|-----------|-----------|--------------------------------------------------------------------------------------|-----------------------|
| Faveoololithidae indet. | Isolated egg(s)<br>(Location 5-1 SH)                                                 | Fine      | Sihwa     | Hanyom, Sihwa<br>Basin, South Korea                                                  | Kim et al. (2009)     |
| Faveoololithidae indet. | Isolated egg(s)<br>(Location 6-2)                                                    | Coarse    | Sihwa     | Hanyom, Sihwa<br>Basin, South Korea                                                  | Kim et al. (2009)     |
| Faveoololithidae indet. | Isolated egg(s)<br>(Location 6-10)                                                   | Fine      | Sihwa     | Hanyom, Sihwa<br>Basin, South Korea                                                  | Kim et al. (2009)     |
| Faveoololithidae indet. | Eggshell(s) (Egg<br>level 2 of Salitral<br>Ojo de Agua)                              | Coarse    | Allen     | Arriagada II, Salitral<br>Ojo de Agua, Rio<br>Negro, Argentina                       | Salgado et al. (2007) |
| Faveoololithidae indet. | Eggshell(s) (Egg<br>level 5 of Salitral<br>Ojo de Agua)                              | Coarse    | Allen     | Cerro de Guerra,<br>Salitral Ojo de Agua,<br>Rio Negro, Argentina                    | Salgado et al. (2007) |
| Faveoololithidae indet. | Eggshell(s) (Egg<br>level 1 of Salitral<br>de Santa Rosa-<br>Salinas de<br>Trapalco) | Coarse    | Allen     | Berthe II, Salitral de<br>Santa Rosa-Salinas de<br>Trapalco, Rio Negro,<br>Argentina | Salgado et al. (2007) |
| Faveoololithidae indet. | Eggshell(s) (Egg<br>level 2 of Salitral<br>de Santa Rosa-<br>Salinas de              | Coarse    | Allen     | Santos IV, Cerro<br>Bonaparte, Berthe I,<br>and Berthe III,<br>Salitral de Santa     | Salgado et al. (2007) |



| Ootaxon/taxon           | Material                                                                             | Lithology | Formation | Locality                                                                                                                 | References            |
|-------------------------|--------------------------------------------------------------------------------------|-----------|-----------|--------------------------------------------------------------------------------------------------------------------------|-----------------------|
|                         | Trapalco)                                                                            |           |           | Rosa-Salinas de<br>Trapalco, Rio Negro,<br>Argentina                                                                     |                       |
| Faveoololithidae indet. | Eggshell(s) (Egg<br>level 3 of Salitral<br>de Santa Rosa-<br>Salinas de<br>Trapalco) | Coarse    | Allen     | Cerro Bonaparte,<br>Salitral de Santa<br>Rosa-Salinas de<br>Trapalco, Rio Negro,<br>Argentina                            | Salgado et al. (2007) |
| Faveoololithidae indet. | Eggshell(s) (Egg<br>level 4 of Salitral<br>de Santa Rosa-<br>Salinas de<br>Trapalco) | Coarse    | Allen     | Berthe V, Berthe VI,<br>and Cerro Tortugas,<br>Salitral de Santa<br>Rosa-Salinas de<br>Trapalco, Rio Negro,<br>Argentina | Salgado et al. (2007) |
| Faveoololithidae indet. | Eggshell(s) (Egg<br>level 5 of Salitral<br>de Santa Rosa-<br>Salinas de<br>Trapalco) | Coarse    | Allen     | Garcia I, Garcia II,<br>and Cerro Tortugas,<br>Salitral de Santa<br>Rosa-Salinas de<br>Trapalco, Rio Negro,<br>Argentina | Salgado et al. (2007) |
| Megaloolithidae         |                                                                                      |           |           |                                                                                                                          |                       |

| Ootaxon/taxon                      | Material        | Lithology | Formation                            | Locality                                                             | References                                |
|------------------------------------|-----------------|-----------|--------------------------------------|----------------------------------------------------------------------|-------------------------------------------|
| <i>Megaloolithus aureliensis</i>   | Isolated egg(s) | Fine      | Tremp                                | Coll de Nargo, Lleida,<br>Catalonia, Spain                           | Sellés et al. (2013)                      |
| cf. <i>M. aureliensis</i>          | Eggshell(s)     | Coarse    | Tremp                                | Fontllonga 6, Tremp<br>Basin, Southern<br>Pyrenees, Lleida,<br>Spain | Vianey-Liaud and<br>Lopez-Martinez (1997) |
| <i>M. baghensis</i>                | Eggshell(s)     | Fine      | Lameta                               | Anjar, Gujarat, India                                                | Khosla and Sahni (1995)                   |
| <i>M. cf. baghensis</i>            | Isolated egg(s) | Fine      | Tremp                                | Coll de Nargo, Lleida,<br>Catalonia, Spain                           | Sellés et al. (2013)                      |
| <i>M. magharebiensis</i>           | Eggshell(s)     | Fine      | Irbzer                               | Oukdiksou syncline,<br>Morocco                                       | Garcia et al. (2003)                      |
| <i>M. mammillare</i>               | Eggshell(s)     | Fine      | Red Marls<br>of Maurine<br>Formation | Roque Fumade,<br>Upper Aude Valley,<br>France                        | Fondevilla et al. (2016)                  |
| Possibly <i>M. mammillare</i>      | Isolated egg(s) | Coarse    | Tremp                                | Bastus, Tremp Basin,<br>Southern Pyrenees,<br>Lleida, Spain          | Vianey-Liaud and<br>Lopez-Martinez (1997) |
| <i>M. mammillare?</i>              | Isolated egg(s) | Coarse    | Tremp                                | Abella, Tremp Basin,<br>Southern Pyrenees,<br>Lleida, Spain          | Vianey-Liaud and<br>Lopez-Martinez (1997) |
| <i>M. matleyi (/jabalpurensis)</i> | Eggshell(s)     | Coarse    | Lameta                               | Patbaba ridge,                                                       | Mohabey (1998)                            |

| Ootaxon/taxon                                          | Material        | Lithology | Formation       | Locality                                                                                                            | References                             |
|--------------------------------------------------------|-----------------|-----------|-----------------|---------------------------------------------------------------------------------------------------------------------|----------------------------------------|
| <i>M. cf. patagonicus</i><br>(Titanosauridae)          | Eggshell(s)     | Fine      | Tremp           | Jabalpur, Madhya Pradesh<br>Costa de la Coma, Figuerola d'Orcau, Isona I Conca Della, South-Central Pyrenees, Spain | Bravo and Gaete (2015)                 |
| <i>M. petralta</i>                                     | Eggshell(s)     | Coarse    | Tremp           | Fontllonga 6, Tremp Basin, Southern Pyrenees, Lleida, Spain                                                         | Vianey-Liaud and Lopez-Martinez (1997) |
| <i>M. petralta</i>                                     | Eggshell(s)     | Coarse    | Aren            | Moro, Tremp Basin, Southern Pyrenees, Lleida, Spain                                                                 | Vianey-Liaud and Lopez-Martinez (1997) |
| <i>M. pseudomamillare?</i> (or<br><i>M. petralta</i> ) | Isolated egg(s) | Coarse    | Tremp           | Suterranya, Tremp Basin, Southern Pyrenees, Lleida, Spain                                                           | Vianey-Liaud and Lopez-Martinez (1997) |
| <i>M. siruguei</i>                                     | Eggshell(s)     | Fine      | Aix-en-Provence | Rousset-Routiers, Aix-en-Provence, France                                                                           | Vianey-Liaud et al. (1994)             |

| Ootaxon/taxon      | Material                                           | Lithology | Formation       | Locality                                                | References                             |
|--------------------|----------------------------------------------------|-----------|-----------------|---------------------------------------------------------|----------------------------------------|
| <i>M. siruguei</i> | Eggshell(s)                                        | Coarse    | Aix-en-Provence | Rousset-Village, Aix-en-Provence, France                | Vianey-Liaud et al. (1994)             |
| <i>M. siruguei</i> | Eggshell(s)                                        | Fine      | Tremp           | Biscarri, Tremp Basin, Southern Pyrenees, Lleida, Spain | Vianey-Liaud and Lopez-Martinez (1997) |
| <i>M. siruguei</i> | Eggshell(s) (one of multiple stratigraphic levels) | Fine      | Tremp           | Coll de Nargo, Lleida, Catalonia, Spain                 | Sellés et al. (2013)                   |
| <i>M. siruguei</i> | Eggshell(s) (one of multiple stratigraphic levels) | Coarse    | Tremp           | Coll de Nargo, Lleida, Catalonia, Spain                 | Sellés et al. (2013)                   |
| <i>M. siruguei</i> | Eggshell(s) (one of multiple stratigraphic levels) | Fine      | Tremp           | Coll de Nargo, Lleida, Catalonia, Spain                 | Sellés et al. (2013)                   |
| <i>M. siruguei</i> | Eggshell(s) (one of multiple stratigraphic levels) | Fine      | Tremp           | Coll de Nargo, Lleida, Catalonia, Spain                 | Sellés et al. (2013)                   |
| <i>M. siruguei</i> | Eggshell(s) (one of multiple stratigraphic levels) | Fine      | Tremp           | Coll de Nargo, Lleida, Catalonia, Spain                 | Sellés et al. (2013)                   |

| Ootaxon/taxon      | Material                                           | Lithology | Formation | Locality                                | References           |
|--------------------|----------------------------------------------------|-----------|-----------|-----------------------------------------|----------------------|
| <i>M. siruguei</i> | Eggshell(s) (one of multiple stratigraphic levels) | Fine      | Tremp     | Coll de Nargo, Lleida, Catalonia, Spain | Sellés et al. (2013) |
| <i>M. siruguei</i> | Eggshell(s) (one of multiple stratigraphic levels) | Fine      | Tremp     | Coll de Nargo, Lleida, Catalonia, Spain | Sellés et al. (2013) |
| <i>M. siruguei</i> | Eggshell(s) (one of multiple stratigraphic levels) | Coarse    | Tremp     | Coll de Nargo, Lleida, Catalonia, Spain | Sellés et al. (2013) |
| <i>M. siruguei</i> | Eggshell(s) (one of multiple stratigraphic levels) | Fine      | Tremp     | Coll de Nargo, Lleida, Catalonia, Spain | Sellés et al. (2013) |
| <i>M. siruguei</i> | Eggshell(s) (one of multiple stratigraphic levels) | Fine      | Tremp     | Coll de Nargo, Lleida, Catalonia, Spain | Sellés et al. (2013) |
| <i>M. siruguei</i> | Eggshell(s) (one of multiple stratigraphic levels) | Coarse    | Tremp     | Coll de Nargo, Lleida, Catalonia, Spain | Sellés et al. (2013) |
| <i>M. siruguei</i> | Eggshell(s) (one of multiple stratigraphic levels) | Fine      | Tremp     | Coll de Nargo, Lleida, Catalonia, Spain | Sellés et al. (2013) |

| Ootaxon/taxon                     | Material                                                  | Lithology | Formation         | Locality                                                                                        | References                        |
|-----------------------------------|-----------------------------------------------------------|-----------|-------------------|-------------------------------------------------------------------------------------------------|-----------------------------------|
| <i>M. cf. siruguei</i>            | Eggshell(s) (one of at least two eggshell-bearing levels) | Fine      | Densus-Ciula      | Livezi, Hateg Basin, Romania                                                                    | Grigorescu et al. (1994; 2010)    |
| <i>M. cf. siruguei</i>            | Eggshell(s) (one of at least two eggshell-bearing levels) | Fine      | Densus-Ciula      | Livezi, Hateg Basin, Romania                                                                    | Grigorescu et al. (1994; 2010)    |
| <i>M. sp.</i>                     | Eggshell(s)                                               | Fine      | NA                | Cruzy (Quarantes basin, Herault) and Vitrolles-Couperigne (Aix basin, Bouches-du-Rhone), France | Garcia (2000)                     |
| <i>M. sp.</i>                     | Eggshell(s)                                               | Coarse    | Aren              | Basturs, Catalunya, Spain                                                                       | Peitz (2001)                      |
| <i>M. sp.</i>                     | Isolated egg(s)                                           | Fine      | Tremp             | Gosol, Catalunya, Spain                                                                         | Peitz (2001)                      |
| <i>Pseudomegaloolithus atlasi</i> | Eggshell(s)                                               | Fine      | Tendrara red beds | Douar Lgara, Tendrara High Plateaus, Morocco                                                    | Chassagne-Manoukian et al. (2013) |
| Megaloolithidae indet.            | Isolated egg(s)                                           | Fine      | NA                | Commune de                                                                                      | Williams et al. (1984)            |

| Ootaxon/taxon          | Material                           | Lithology | Formation                               | Locality                                                                            | References              |
|------------------------|------------------------------------|-----------|-----------------------------------------|-------------------------------------------------------------------------------------|-------------------------|
|                        |                                    |           |                                         | Pourcieux, Aix-en-Provence, France                                                  |                         |
| Megaloolithidae indet. | Eggshell(s) (One of five horizons) | Coarse    | Galula Formation of Red Sandstone Group | TZ-07, 20 km west of the town of Mbeya in the Mbeya District, southwestern Tanzania | Gottfried et al. (2004) |
| Megaloolithidae indet. | Eggshell(s) (One of five horizons) | Coarse    | Galula Formation of Red Sandstone Group | TZ-07, 20 km west of the town of Mbeya in the Mbeya District, southwestern Tanzania | Gottfried et al. (2004) |
| Megaloolithidae indet. | Eggshell(s) (One of five horizons) | Coarse    | Galula Formation of Red Sandstone Group | TZ-07, 20 km west of the town of Mbeya in the Mbeya District, southwestern Tanzania | Gottfried et al. (2004) |
| Megaloolithidae indet. | Eggshell(s) (One of five horizons) | Coarse    | Galula Formation of Red Sandstone       | TZ-07, 20 km west of the town of Mbeya in the Mbeya District, southwestern          | Gottfried et al. (2004) |

| Ootaxon/taxon                    | Material                                                  | Lithology | Formation                         | Locality                                                                   | References              |
|----------------------------------|-----------------------------------------------------------|-----------|-----------------------------------|----------------------------------------------------------------------------|-------------------------|
|                                  |                                                           |           | Group                             | Tanzania                                                                   |                         |
| Megaloolithidae indet.           | Eggshell(s) (One of five horizons)                        | Coarse    | Galula Formation of Red Sandstone | TZ-07, 20 km west of the town of Mbeya in the Mbeya District, southwestern | Gottfried et al. (2004) |
|                                  |                                                           |           | Group                             | Tanzania                                                                   |                         |
| Megaloolithidae indet.           | Eggshell(s)                                               | Coarse    | Marilia                           | Peiropolis, Baruru Basin, Marilia County, San Paulo State, Brazil          | Ribeiro (2002)          |
|                                  |                                                           |           |                                   |                                                                            |                         |
| Megaloolithidae indet.           | Eggshell(s)                                               | Coarse    | Marilia                           | Ponte Alta, Baruru Basin, Marilia County, San Paulo State, Brazil          | Ribeiro (2002)          |
|                                  |                                                           |           |                                   |                                                                            |                         |
| Megaloolithidae indet. (Type 2A) | Type 2A eggshell(s) (Egg level 4 of Salitral Ojo de Agua) | Coarse    | Allen                             | Arrigada I, Salitral Ojo de Agua, Rio Negro, Argentina                     | Salgado et al. (2007)   |
|                                  |                                                           |           |                                   |                                                                            |                         |
| Megaloolithidae indet. (Type 2A) | Type 2A eggshell(s) (Egg level 1 of Salitral de Santa     | Coarse    | Allen                             | Berthe II, Salitral de Santa Rosa-Salinas de Trapalco, Rio Negro,          | Salgado et al. (2007)   |



| Ootaxon/taxon                       | Material                                                                                        | Lithology | Formation | Locality                                                                                      | References            |
|-------------------------------------|-------------------------------------------------------------------------------------------------|-----------|-----------|-----------------------------------------------------------------------------------------------|-----------------------|
|                                     | Rosa-Salinas de<br>Trapalco)                                                                    |           |           | Argentina                                                                                     |                       |
| Megaloolithidae indet.<br>(Type 2A) | Type 2A eggshell(s)<br>(Egg level 2 of<br>Salitral de Santa<br>Rosa-Salinas de<br>Trapalco)     | Coarse    | Allen     | Cerro Bonaparte,<br>Salitral de Santa<br>Rosa-Salinas de<br>Trapalco, Rio Negro,<br>Argentina | Salgado et al. (2007) |
| Megaloolithidae indet.<br>(Type 2A) | Type 2A isolated<br>egg(s) (Egg level 4<br>of Salitral de Santa<br>Rosa-Salinas de<br>Trapalco) | Coarse    | Allen     | Berthe IV, Salitral de<br>Santa Rosa-Salinas de<br>Trapalco, Rio Negro,<br>Argentina          | Salgado et al. (2007) |
| Megaloolithidae indet.<br>(Type 2A) | Type 2A eggshell(s)<br>(Egg level 5 of<br>Salitral de Santa<br>Rosa-Salinas de<br>Trapalco)     | Coarse    | Allen     | Cerro Turtugas,<br>Salitral de Santa<br>Rosa-Salinas de<br>Trapalco, Rio Negro,<br>Argentina  | Salgado et al. (2007) |
| Megaloolithidae indet.<br>(Type 2B) | Type 2B eggshell(s)<br>(Egg level 2 of<br>Salitral de Santa<br>Rosa-Salinas de                  | Coarse    | Allen     | Berthe III, Salitral de<br>Santa Rosa-Salinas de<br>Trapalco, Rio Negro,<br>Argentina         | Salgado et al. (2007) |

| Ootaxon/taxon                           | Material                                                                                    | Lithology | Formation | Locality                                                                                        | References                                     |
|-----------------------------------------|---------------------------------------------------------------------------------------------|-----------|-----------|-------------------------------------------------------------------------------------------------|------------------------------------------------|
|                                         | Trapalco)                                                                                   |           |           |                                                                                                 |                                                |
| Megaloolithidae indet.<br>(Type 2B)     | Type 2B eggshell(s)<br>(Egg level 3 of<br>Salitral de Santa<br>Rosa-Salinas de<br>Trapalco) | Coarse    | Allen     | Mansilla I and II,<br>Salitral de Santa<br>Rosa-Salinas de<br>Trapalco, Rio Negro,<br>Argentina | Salgado et al. (2007)                          |
| Megaloolithidae indet.<br>(Type 2B)     | Type 2B eggshell(s)<br>(Egg level 4 of<br>Salitral de Santa<br>Rosa-Salinas de<br>Trapalco) | Coarse    | Allen     | Berthe V and VI,<br>Salitral de Santa<br>Rosa-Salinas de<br>Trapalco, Rio Negro,<br>Argentina   | Salgado et al. (2007)                          |
| Megaloolithidae indet.<br>(Type 2B)     | Type 2B eggshell(s)<br>(Egg level 5 of<br>Salitral de Santa<br>Rosa-Salinas de<br>Trapalco) | Coarse    | Allen     | Garcia I, Salitral de<br>Santa Rosa-Salinas de<br>Trapalco, Rio Negro,<br>Argentina             | Salgado et al. (2007)                          |
| " <i>Hypselosaurus priscus</i> "        | Eggshell(s)                                                                                 | Coarse    | NA        | Rennes-le-chateau,<br>Aude, France                                                              | Cousin et al. (1989)                           |
| Montanoolithidae                        |                                                                                             |           |           |                                                                                                 |                                                |
| <i>Montanoolithus<br/>labadousensis</i> | Eggshell(s)                                                                                 | Fine      | NA        | Rennes-le-chateau,<br>Aude, France                                                              | Beetschen et al. (1977);<br>Vila et al. (2017) |

| Ootaxon/taxon                                         | Material                                           | Lithology | Formation    | Locality                                            | References                |
|-------------------------------------------------------|----------------------------------------------------|-----------|--------------|-----------------------------------------------------|---------------------------|
| <i>M. cf. strongorum</i>                              | Eggshell(s)                                        | Fine      | Willow Creek | Todd Creek area, Alberta Canada                     | Zelenitsky et al. (2017b) |
| Ovaloolithidae                                        |                                                    |           |              |                                                     |                           |
| Ovaloolithidae indet.                                 | Eggshell(s)                                        | Fine      | NA           | Tel Ulan Chaltsai (Mogoin Daatsyn Khuduk), Mongolia | Watabe et al. (2010)      |
| Pinnatoolithae                                        |                                                    |           |              |                                                     |                           |
| <i>Lanceoololithus xiapingensis</i>                   | Eggshell(s) (one of multiple stratigraphic levels) | Coarse    | Zhutian      | Nanxiong Basin, Guangdong, China                    | Fang et al. (2009)        |
| <i>L. xiapingensis</i>                                | Eggshell(s) (one of multiple stratigraphic levels) | Coarse    | Zhutian      | Nanxiong Basin, Guangdong, China                    | Fang et al. (2009)        |
| Polyclonoolithidae                                    |                                                    |           |              |                                                     |                           |
| <i>Polyclonoolithus yangjiagouensis</i>               | Isolated egg(s)                                    | Fine      | Hekou Group  | Yangjiagou, Lanzhou-Minhe Basin, Gansu, China       | Xie et al. (2016)         |
| <i>Preprismatoolithus</i>                             |                                                    |           |              |                                                     |                           |
| <i>Preprismatoolithus (Lourinhanosaurus antunesi)</i> | Eggshell(s)                                        | Fine      | Lourinha     | Casal da Rola, near Lourinha, Portugal              | Ribeiro et al. (2014)     |
| <i>P. coloradensis</i>                                | Isolated egg(s)                                    | Fine      | Morrison     | Cleveland-Lloyd                                     | Hirsch et al. (1989);     |

| Ootaxon/taxon                                 | Material        | Lithology | Formation                  | Locality                                                             | References                                |
|-----------------------------------------------|-----------------|-----------|----------------------------|----------------------------------------------------------------------|-------------------------------------------|
| <i>(Allosaurus)</i>                           |                 |           |                            | Dinosaur Quarry,<br>Emery County, Utah,<br>USA                       | Hirsch (1994)                             |
| <i>P. coloradensis</i><br><i>(Allosaurus)</i> | Eggshell(s)     | Fine      | Morrison                   | Garden Park Area,<br>near Canyon City,<br>Colorado, USA              | Hirsch (1994)                             |
| Prismatoolithidae                             |                 |           |                            |                                                                      |                                           |
| <i>Prismatoolithus carboti</i>                | Isolated egg(s) | Fine      | Villeveyrac-<br>Meze Basin | Grande Marquise,<br>Herault, France                                  | Garcia et al. (2000)                      |
| <i>P. carboti</i>                             | Eggshell(s)     | Fine      | Villeveyrac-<br>Meze Basin | Neuve, Bouches-du-<br>Rhone, France                                  | Garcia et al. (2000)                      |
| <i>P. cf. levis</i>                           | Eggshell(s)     | Fine      | Willow<br>Creek            | Todd Creek area,<br>Alberta Canada                                   | Zelenitsky et al. (2017b)                 |
| aff. <i>P. matellensis</i>                    | Eggshell(s)     | Coarse    | Tremp                      | Fontllonga 6, Tremp<br>Basin, Southern<br>Pyrenees, Lleida,<br>Spain | Vianey-Liaud and<br>Lopez-Martinez (1997) |
| <i>P. tenuis</i>                              | Eggshell(s)     | Coarse    | Tremp                      | Fontllonga 6, Tremp<br>Basin, Southern<br>Pyrenees, Lleida,<br>Spain | Vianey-Liaud and<br>Lopez-Martinez (1997) |

| Ootaxon/taxon                        | Material        | Lithology | Formation     | Locality                                                     | References                                         |
|--------------------------------------|-----------------|-----------|---------------|--------------------------------------------------------------|----------------------------------------------------|
| <i>Protoceratopsidovum fluxuosum</i> | Eggshell(s)     | Coarse    | NA            | Nemegt, Gobi, Mongolia                                       | Sabath (1991)                                      |
| <i>P. minimum</i>                    | Isolated egg(s) | Coarse    | Nemegt        | Altan Ula IV, Gobi, Mongolia                                 | Sabath (1991)                                      |
| <i>P. sp.</i>                        | Eggshell(s)     | Coarse    | Djadokhta     | Bayn Dzak, Gobi, Mongolia                                    | Suzuki and Watabe (2000b)                          |
| <i>P. sp.</i>                        | Eggshell(s)     | Coarse    | Djadokhta     | Bayn Dzak, Gobi, Mongolia                                    | Watabe et al. (2010)                               |
| <i>Sankofa pyrenaica</i>             | Eggshell(s)     | Coarse    | Aren          | Urbanizacion Montsec, Montsec area, Lleida, Catalonia, Spain | Lopez-Martinez and Vicens (2012)                   |
| <i>Trigonoolithus amoae</i>          | Eggshell(s)     | Fine      | Belsa         | La Cantalera site, Josa, Teruel, northern Spain              | Canudo et al. (2010); Moreno-Azanza et al. (2014b) |
| <i>Prismatoolithus sp.</i>           | Eggshell(s)     | Coarse    | Dinosaur Park | Bonebed BB098, Dinosaur Provincial Park, Alberta             | Zelenitsky and Sloboda (2005)                      |
| <i>P. sp.</i>                        | Eggshell(s)     | Fine      | Blesa         | La Cantalera, Teruel, Spain                                  | Canudo et al. (2010)                               |
| <i>P. sp.</i>                        | Eggshell(s)     | Coarse    | Fruitland     | NMMNH L-4010,                                                | Tanaka et al. (2011)                               |

| Ootaxon/taxon             | Material    | Lithology | Formation                                    | Locality                                                                                                     | References                |
|---------------------------|-------------|-----------|----------------------------------------------|--------------------------------------------------------------------------------------------------------------|---------------------------|
|                           |             |           |                                              | Bisti/De-na-zin<br>Wilderness area, San<br>Juan Basin, New<br>Mexico                                         |                           |
| <i>P. sp.</i>             | Eggshell(s) | Fine      | 'Lower<br>Formation'<br>of Sasayama<br>Group | Kamitaki, Tamba,<br>Hyogo, Japan                                                                             | Tanaka et al. (2016)      |
| <i>P. sp.</i>             | Eggshell(s) | Fine      | Willow<br>Creek                              | Whiskey Gap area<br>and Todd Creek area,<br>Alberta Canada                                                   | Zelenitsky et al. (2017b) |
| <i>P. sp.</i>             | Eggshell(s) | Coarse    | Milk River                                   | Verdigris Coulee,<br>Alberta, Canada                                                                         | Zelenitsky et al. (2017a) |
| <i>cf. Prismaoolithus</i> | Eggshell(s) | Fine      | Late<br>Cretaceous                           | Cruzy (Quarantes<br>basin, Herault) and<br>Vitrolles-Couperigne<br>(Aix basin, Bouches-<br>du-Rhone), France | Garcia (2000)             |
| <i>Prismaoolithus?</i>    | Eggshell(s) | Fine      | Irbzer                                       | Oukdiksou syncline,<br>Morocco                                                                               | Garcia et al. (2003)      |
| Prismaoolithidae indet.   | Eggshell(s) | Fine      | 'Lower                                       | Kamitaki, Tamba,                                                                                             | Tanaka et al. (2016)      |

| Ootaxon/taxon                                  | Material        | Lithology | Formation                          | Locality                                                   | References                       |
|------------------------------------------------|-----------------|-----------|------------------------------------|------------------------------------------------------------|----------------------------------|
|                                                |                 |           | Formation'<br>of Sasayama<br>Group | Hyogo, Japan                                               |                                  |
| Similifaveoolithidae                           |                 |           |                                    |                                                            |                                  |
| <i>Similifaveoolithus<br/>gongzhulingensis</i> | Isolated egg(s) | Fine      | Quantou                            | Liufangzi,<br>Gongzhuling, Jilin,<br>China                 | Wang et al. (2006; 2013)         |
| Spheroolithidae                                |                 |           |                                    |                                                            |                                  |
| <i>Guegoolithus turolensis</i>                 | Eggshell(s)     | Fine      | Blesa                              | Galve, Teruel, Spain                                       | Moreno-Azanza et al.<br>(2014a)  |
| <i>G. turolensis</i>                           | Eggshell(s)     | Coarse    | Camarillas                         | Galve, Teruel, Spain                                       | Moreno-Azanza et al.<br>(2014a)  |
| <i>Spheroolithus albertensis</i> *             | Eggshell(s)     | Coarse    | Dinosaur<br>Park                   | Bonebed BB031,<br>Dinosaur Provincial<br>Park, Alberta     | Zelenitsky and Sloboda<br>(2005) |
| <i>S. albertensis</i> *                        | Eggshell(s)     | Fine      | Dinosaur<br>Park                   | Bonebed BB104,<br>Dinosaur Provincial<br>Park, Alberta     | Zelenitsky and Sloboda<br>(2005) |
| <i>S. cf. albertensis</i>                      | Eggshell(s)     | Fine      | Willow<br>Creek                    | Whiskey Gap area<br>and Todd Creek area,<br>Alberta Canada | Zelenitsky et al. (2017b)        |

| Ootaxon/taxon                                                    | Material        | Lithology | Formation    | Locality                                                                                             | References                                                       |
|------------------------------------------------------------------|-----------------|-----------|--------------|------------------------------------------------------------------------------------------------------|------------------------------------------------------------------|
| <i>S. cf. choteauensis</i>                                       | Eggshell(s)     | Fine      | Willow Creek | Junction of the Oldman River and Callum Creek, Whiskey Gap area, and Todd Creek area, Alberta Canada | Zelenitsky et al. (2017b)                                        |
| <i>S. cf. choteauensis</i>                                       | Eggshell(s)     | Coarse    | Milk River   | Verdigris Coulee, Alberta, Canada                                                                    | Zelenitsky et al. (2017a)                                        |
| <i>S. europaeus</i>                                              | Eggshell(s)     | Coarse    | Tremp        | Pont d'Orrit, Tremp, Lleida, Catalonia, Spain                                                        | Sellés et al. (2014)                                             |
| <i>S. megadermus</i>                                             | Isolated egg(s) | Fine      | Quantou      | Changtu, Liaoning, China                                                                             | Liu et al. (2013)                                                |
| <i>S. spheroides</i> (including <i>S. Chiangchiugtingensis</i> ) | Isolated egg(s) | Fine      | Quantou      | Changtu, Liaoning, China                                                                             | Liu et al. (2013)                                                |
| <i>S. sp.</i>                                                    | Isolated egg(s) | Fine      | Seonso       | Bosung County, Chullanam-do, South Korea                                                             | Huh and Zelenitsky (2002); Kim et al. (2009); Paik et al. (2004) |
| <i>S. sp.</i>                                                    | Isolated egg(s) | Fine      | Seonso       | Bosung County, Chullanam-do, South Korea                                                             | Huh and Zelenitsky (2002); Kim et al. (2009)                     |



| Ootaxon/taxon          | Material                                                           | Lithology | Formation                           | Locality                                                                                 | References            |
|------------------------|--------------------------------------------------------------------|-----------|-------------------------------------|------------------------------------------------------------------------------------------|-----------------------|
| <i>S. sp.</i>          | Eggshell(s)                                                        | Fine      | 'Lower Formation' of Sasayama Group | Kamitaki, Tamba, Hyogo, Japan                                                            | Tanaka et al. (2016)  |
| <i>S. sp.</i>          | Eggshell(s) with perinatal <i>Saurolophus angustirostris</i> bones | Coarse    | Nemegt                              | Dragon's Tomb' dinosaur locality, Gobi, Mongolia                                         | Dewaele et al. (2015) |
| <i>Spheroolithus?</i>  | Eggshell(s) (one of multiple stratigraphic levels)                 | Fine      | Lameta                              | Dongargaon, Pisdura, Polgaon and Tidkepar in Kholdoda and Chandrapur, Maharashtra, India | Mohabey (1996; 2001)  |
| <i>Spheroolithus?</i>  | Eggshell(s) (one of multiple stratigraphic levels)                 | Coarse    | Lameta                              | Dongargaon, Pisdura, Polgaon and Tidkepar in Kholdoda and Chandrapur, Maharashtra, India | Mohabey (1996; 2001)  |
| Spheroolithidae indet. | Eggshell(s)                                                        | Coarse    | ?Djadokhta                          | Toosgot area, Abdrant Nuru, Gobi, Mongolia                                               | Watabe (2004)         |

| Ootaxon/taxon                      | Material                                | Lithology | Formation | Locality                                                    | References                             |
|------------------------------------|-----------------------------------------|-----------|-----------|-------------------------------------------------------------|----------------------------------------|
| Spheroolithidae indet.             | Eggshell(s) (Site 1: Lower Horizon)     | Fine      | Goseong   | Goseong, South Korea                                        | Paik et al. (2012)                     |
| Spheroolithidae indet.             | Isolated egg(s) (Site 1: Upper Horizon) | Coarse    | Goseong   | Goseong, South Korea                                        | Paik et al. (2012)                     |
| Spheroolithidae indet.             | Isolated egg(s) (Site 2: Upper Horizon) | Fine      | Goseong   | Goseong, South Korea                                        | Paik et al. (2012)                     |
| Spheroolithidae indet.             | Eggshell(s)                             | Fine      | Nemegt    | Shar Tsav, Gobi, Mongolia                                   | Watabe et al. (2010)                   |
| Spheroolithidae indet.             | Eggshell(s)                             | Fine      | Djadokhta | Bortolgoi, Gobi, Mongolia                                   | Watabe et al. (2010)                   |
| Spheroolithidae indet.             | Eggshell(s)                             | Coarse    | ?Nemegt   | Yagaan Khovil, Gobi, Mongolia                               | Watabe et al. (2010)                   |
| cf. Spheroolithidae                | Eggshell(s)                             | Fine      | Blesa     | La Cantalera, Teruel, Spain                                 | Canudo et al. (2010)                   |
| Oofamily incertae sedis            |                                         |           |           |                                                             |                                        |
| <i>Ageroolithus fontllongensis</i> | Eggshell(s)                             | Coarse    | Tremp     | Fontllonga 6, Tremp Basin, Southern Pyrenees, Lleida, Spain | Vianey-Liaud and Lopez-Martinez (1997) |
| <i>A. fontllongensis</i>           | Eggshell(s)                             | Coarse    | Aren      | Moro, Tremp Basin, Southern Pyrenees,                       | Vianey-Liaud and Lopez-Martinez (1997) |

| Ootaxon/taxon                     | Material    | Lithology | Formation        | Locality                                                       | References                       |
|-----------------------------------|-------------|-----------|------------------|----------------------------------------------------------------|----------------------------------|
|                                   |             |           |                  | Lleida, Spain                                                  |                                  |
| <i>cf. Ageroolithus</i>           | Eggshell(s) | Fine      | NA               | Vitrolles-Couperigne,<br>France                                | Garcia (2000)                    |
| <i>Continuoolithus canadensis</i> | Eggshell(s) | Fine      | Oldman           | Little Diablo's Hill,<br>Devil's Coulee,<br>Alberta, Canada    | Zelenitsky et al. (1996)         |
| <i>C. canadensis</i>              | Eggshell(s) | Fine      | Oldman           | North Baby Butte,<br>Devil's Coulee,<br>Alberta, Canada        | Zelenitsky et al. (1996)         |
| <i>C. canadensis</i>              | Eggshell(s) | Fine      | Oldman           | Faye Walker's Coulee,<br>Devil's Coulee,<br>Alberta, Canada    | Zelenitsky et al. (1996)         |
| <i>C. canadensis</i>              | Eggshell(s) | Fine      | Oldman           | Juvie Camp, Devil's<br>Coulee, Alberta,<br>Canada              | Zelenitsky et al. (1996)         |
| <i>C. canadensis</i>              | Eggshell(s) | Fine      | Oldman           | Knight's Ranch,<br>Alberta, Canada                             | Zelenitsky et al. (1996)         |
| <i>C. canadensis</i> *            | Eggshell(s) | Coarse    | Dinosaur<br>Park | Bonebed BB031,<br>Dinosaur Provincial<br>Park, Alberta, Canada | Zelenitsky and Sloboda<br>(2005) |
| <i>C. canadensis</i> *            | Eggshell(s) | Coarse    | Dinosaur         | Bonebed BB098,                                                 | Zelenitsky and Sloboda           |

| Ootaxon/taxon                                 | Material    | Lithology | Formation        | Locality                                                                                      | References                       |
|-----------------------------------------------|-------------|-----------|------------------|-----------------------------------------------------------------------------------------------|----------------------------------|
|                                               |             |           | Park             | Dinosaur Provincial<br>Park, Alberta, Canada                                                  | (2005)                           |
| <i>C. canadensis</i> *                        | Eggshell(s) | Fine      | Dinosaur<br>Park | Bonebed BB104,<br>Dinosaur Provincial<br>Park, Alberta, Canada                                | Zelenitsky and Sloboda<br>(2005) |
| <i>C. canadensis</i>                          | Eggshell(s) | Coarse    | Fruitland        | NMMNH L-4010,<br>Bisti/De-na-zin<br>Wilderness area, San<br>Juan Basin, New<br>Mexico, USA    | Tanaka et al. (2011)             |
| <i>C. cf. canadensis</i>                      | Eggshell(s) | Fine      | Willow<br>Creek  | Whiskey Gap area,<br>Alberta Canada                                                           | Zelenitsky et al. (2017b)        |
| <i>C. cf. canadensis</i>                      | Eggshell(s) | Coarse    | Milk River       | Verdigris Coulee,<br>Alberta, Canada                                                          | Zelenitsky et al. (2017a)        |
| <i>cf. Continuoolithus</i>                    | Eggshell(s) | Fine      | Aguja            | "Purple Hill"<br>microsite, Rattlesnake<br>Mountain, Big Bend<br>National Park, Texas,<br>USA | Welsh and Sankey<br>(2005)       |
| Ornithoid basic type and<br>ratite morphotype | Eggshell(s) | Fine      | Morrison         | Rio Puerco drainage,<br>Arch Mesa, Sandoval                                                   | Bray and Lucas (1997)            |

| Ootaxon/taxon                       | Material                                                                            | Lithology | Formation                                    | Locality                                                                            | References                                                                          |
|-------------------------------------|-------------------------------------------------------------------------------------|-----------|----------------------------------------------|-------------------------------------------------------------------------------------|-------------------------------------------------------------------------------------|
| <i>(Continuoolithus?)</i>           |                                                                                     |           |                                              | County, New Mexico,<br>USA                                                          |                                                                                     |
| <i>Deinonychus antirrhopus</i>      | Isolated egg(s) with<br>embryonic<br><i>Deinonychus</i><br><i>antirrhopus</i> bones | Fine      | Cloverly                                     | 'Cashen Pocket',<br>Crow Indian<br>reservation, Big Horn<br>County, Montana,<br>USA | Makovicky and Grellet-<br>Tinner (2001); Grellet-<br>Tinner and Makovicky<br>(2006) |
| <i>Dispersituberoolithus exilis</i> | Eggshell(s)                                                                         | Fine      | Oldman                                       | Little Diablo's Hill,<br>Devil's Coulee,<br>Alberta, Canada                         | Zelenitsky et al. (1996)                                                            |
| Probably <i>Lufengosaurus</i>       | Eggshell(s) with<br>embryonic possible<br><i>Lufengosaurus</i><br>bones             | Fine      | Lower<br>Lufeng                              | Kunming, Yunnan,<br>China                                                           | Reisz et al. (2013)                                                                 |
| Multicanalicate eggs                | Eggshell(s)                                                                         | Coarse    | Mercedes                                     | Soriano, Uruguay                                                                    | Faccio (1994)                                                                       |
| Multicanalicate eggs                | Eggshell(s)                                                                         | Coarse    | Mercedes                                     | Algorta, Uruguay                                                                    | Faccio (1994)                                                                       |
| <i>Nipponoolithus ramosus</i>       | Eggshell(s)                                                                         | Fine      | 'Lower<br>Formation'<br>of Sasayama<br>Group | Kamitaki, Tamba,<br>Hyogo, Japan                                                    | Tanaka et al. (2016)                                                                |
| <i>Porituberoolithus</i>            | Eggshell(s)                                                                         | Fine      | Oldman                                       | Little Diablo's Hill,                                                               | Zelenitsky et al. (1996)                                                            |

| Ootaxon/taxon                | Material    | Lithology | Formation        | Locality                                                                                   | References                       |
|------------------------------|-------------|-----------|------------------|--------------------------------------------------------------------------------------------|----------------------------------|
| <i>warnerensis</i>           |             |           |                  | Devil's Coulee,<br>Alberta, Canada                                                         |                                  |
| <i>P. warnerensis</i>        | Eggshell(s) | Fine      | Oldman           | Faye Walker's Coulee,<br>Devil's Coulee,<br>Alberta, Canada                                | Zelenitsky et al. (1996)         |
| <i>P. warnerensis</i>        | Eggshell(s) | Fine      | Oldman           | Knight's Ranch,<br>Alberta, Canada                                                         | Zelenitsky et al. (1996)         |
| <i>P. warnerensis</i> *      | Eggshell(s) | Coarse    | Dinosaur<br>Park | Bonebed BB031,<br>Dinosaur Provincial<br>Park, Alberta, Canada                             | Zelenitsky and Sloboda<br>(2005) |
| <i>P. warnerensis</i>        | Eggshell(s) | Fine      | Willow<br>Creek  | Whiskey Gap area<br>and Todd Creek area,<br>Alberta Canada                                 | Zelenitsky et al. (2017b)        |
| <i>P. warnerensis</i>        | Eggshell(s) | Coarse    | Fruitland        | NMMNH L-4010,<br>Bisti/De-na-zin<br>Wilderness area, San<br>Juan Basin, New<br>Mexico, USA | Tanaka et al. (2011)             |
| <i>P. cf. warnerensis</i>    | Eggshell(s) | Coarse    | Milk River       | Verdigris Coulee,<br>Alberta, Canada                                                       | Zelenitsky et al. (2017a)        |
| <i>cf. Porituberoolithus</i> | Eggshell(s) | Fine      | Aguja            | "Purple Hill"                                                                              | Welsh and Sankey                 |

| Ootaxon/taxon                        | Material    | Lithology | Formation     | Locality                                                            | References                             |
|--------------------------------------|-------------|-----------|---------------|---------------------------------------------------------------------|----------------------------------------|
|                                      |             |           |               | microsite, Rattlesnake Mountain, Big Bend National Park, Texas, USA | (2005)                                 |
| <i>Pseudogeckoolithus nodosus</i>    | Eggshell(s) | Coarse    | Trempealeau   | Fontllonga 6, Trempealeau Basin, Southern Pyrenees, Lleida, Spain   | Vianey-Liaud and Lopez-Martinez (1997) |
| <i>Pseudogeckoolithus?</i>           | Eggshell(s) | Fine      | NA            | Cruzy (Quarantes basin, Herault), France                            | Garcia (2000)                          |
| <i>Reticuloolithus hirschi</i> *     | Eggshell(s) | Fine      | Dinosaur Park | Bonebed BB104, Dinosaur Provincial Park, Alberta, Canada            | Zelenitsky and Sloboda (2005)          |
| <i>Tristraguloolithus cracioides</i> | Eggshell(s) | Fine      | Oldman        | Knight's Ranch, Alberta, Canada                                     | Zelenitsky et al. (1996)               |
| <i>T. cracioides</i>                 | Eggshell(s) | Fine      | Oldman        | Little Diablo's Hill, Devil's Coulee, Alberta, Canada               | Zelenitsky et al. (1996)               |
| <i>T. cracioides</i>                 | Eggshell(s) | Fine      | Oldman        | Faye Walker's Coulee, Devil's Coulee,                               | Zelenitsky et al. (1996)               |

| Ootaxon/taxon                       | Material    | Lithology | Formation | Locality                                                                                                      | References                                |
|-------------------------------------|-------------|-----------|-----------|---------------------------------------------------------------------------------------------------------------|-------------------------------------------|
| Indeterminate theropod eggshell     | Eggshell(s) | Coarse    | Fruitland | Alberta, Canada<br>NMMNH L-4010,<br>Bisti/De-na-zin<br>Wilderness area, San<br>Juan Basin, New<br>Mexico, USA | Tanaka et al. (2011)                      |
| Dinosauroid spherulithic basic type | Eggshell(s) | Fine      | Aguja     | "Purple Hill"<br>microsite, Rattlesnake<br>Mountain, Big Bend<br>National Park, Texas,<br>USA                 | Welsh and Sankey<br>(2005)                |
| ?Prismatoolithidae                  | Eggshell(s) | Coarse    | Tremp     | Fontllonga 6, Tremp<br>Basin, Southern<br>Pyrenees, Lleida,<br>Spain                                          | Vianey-Liaud and<br>Lopez-Martinez (1997) |
| ?Prismatoolithidae                  | Eggshell(s) | Fine      | Morrison  | Gallison Locality,<br>Delta County,<br>Colorado, USA                                                          | Hirsch (1994)                             |
| Dinosauroid prismatic basic type    | Eggshell(s) | Fine      | Aguja     | "Purple Hill"<br>microsite, Rattlesnake<br>Mountain, Big Bend                                                 | Welsh and Sankey<br>(2005)                |



| Ootaxon/taxon                      | Material        | Lithology | Formation   | Locality                                                                                                                      | References                   |
|------------------------------------|-----------------|-----------|-------------|-------------------------------------------------------------------------------------------------------------------------------|------------------------------|
| Ratite morphotype                  | Eggshell(s)     | Fine      | Aguja       | National Park, Texas,<br>USA<br>"Purple Hill"<br>microsite, Rattlesnake<br>Mountain, Big Bend<br>National Park, Texas,<br>USA | Welsh and Sankey<br>(2005)   |
| Prismatic morphotype               | Eggshell(s)     | Fine      | NA          | La Neuve and Grande<br>Marquise, France                                                                                       | Garcia (2000)                |
| Indet. type                        | Isolated egg(s) | Fine      | Oxford Clay | Oxford Clay,<br>Peterborough,<br>England                                                                                      | Liston and Chapman<br>(2014) |
| Indet. Type (thin ridged<br>type)  | Eggshell(s)     | Fine      | Cloverly    | MOR CL-121,<br>Bridger, Carbon<br>County, Montana,<br>USA                                                                     | Maxwell and Horner<br>(1994) |
| Indet. Type (thick ridged<br>type) | Eggshell(s)     | Fine      | Cloverly    | MOR CL-121,<br>Bridger, Carbon<br>County, Montana,<br>USA                                                                     | Maxwell and Horner<br>(1994) |
| Indet. Type (nodes type)           | Eggshell(s)     | Fine      | Cloverly    | MOR CL-121,                                                                                                                   | Maxwell and Horner           |

---

| Ootaxon/taxon | Material    | Lithology | Formation | Locality                                             | References    |
|---------------|-------------|-----------|-----------|------------------------------------------------------|---------------|
|               |             |           |           | Bridger, Carbon<br>County, Montana,<br>USA           | (1994)        |
| Indet. type   | Eggshell(s) | Fine      | Morrison  | Callison Locality,<br>Delta County,<br>Colorado, USA | Hirsch (1994) |

---

**Supplementary Table S5. List of ootaxa and their possible parental taxa used in this study.**

| Oofamily                                                       | Parental taxa                                                        | Identification based on:                             | Reference                                                                                                                                                                                  |
|----------------------------------------------------------------|----------------------------------------------------------------------|------------------------------------------------------|--------------------------------------------------------------------------------------------------------------------------------------------------------------------------------------------|
| Dendroolithidae<br>(also known as<br>Phaceloolithidae)         | <i>Torvosaurus</i> and possibly<br>therizinosauroids                 | Embryos                                              | Manning et al. (1997); Kundrat et al.<br>(2008); Araujo et al. (2013); Ribeiro et al.<br>(2014)                                                                                            |
| Elongatoolithidae                                              | Oviraptorosauria                                                     | Embryos, a gravid adult, and<br>adults atop clutches | Dong and Currie (1996); Clark et al.,<br>(1999); Norell et al. (2001); Sato et al.<br>(2005); Cheng et al. (2008); Weishampel et<br>al. (2008); Fanti et al. (2012); Wang et al.<br>(2016) |
| Faveoololithidae                                               | ?Sauropodomorpha                                                     | Eggshell morphology                                  | Grellet-Tinner and Fiorelli (2010); Grellet-<br>Tinner et al. (2012)                                                                                                                       |
| Megaloolithidae                                                | Titanosaurs                                                          | Embryos                                              | Chiappe et al. (1998; 2001)                                                                                                                                                                |
| Prismatoolithidae<br>(excluding<br><i>Preprismatoolithus</i> ) | Troodontids and non-<br>oviraptorosaur maniraptorans                 | Embryos and eggshell<br>morphology                   | Varricchio et al. (1997; 2002); Zelenitsky<br>and Therrien (2008a); Lopez-Martinez and<br>Vicens (2012)                                                                                    |
| Spheroolithidae                                                | Ornithschian, including<br><i>Maiasaura</i> and <i>Hypacrosaurus</i> | Embryos                                              | Horner and Makela (1979); Hirsch and<br>Quinn (1990); Horner (1999; 2000)                                                                                                                  |

**Supplementary Table S6. Approximate paleolatitudes of egg localities for major dinosaur ootaxa.**

Abbreviations: D, Dendroolithidae; E, Elongatoolithidae; Fa, Faveoololithidae; Me, Megaloolithidae; NA, not available; Pre, *Preprismatoolithus*; Pri, Prismatoolithidae; Sp, Spheroolithidae. Positive and negative values of paleolatitudes represent north and south latitudes, respectively.

| Ootaxon | Locality                                                   | Formation  | Approximate age (Ma) | Approximate paleolatitude (°) | Example of references                        |
|---------|------------------------------------------------------------|------------|----------------------|-------------------------------|----------------------------------------------|
| D       | Heyuan Basin, Guangdong, China                             | Dongyuan   | 65                   | 29.10                         | Fang et al. (2005)                           |
| D       | Nanyang Valley near Xinye, Henan, China                    | Nancho     | 80                   | 36.50                         | Manning et al. (1997); Kundrat et al. (2008) |
| D       | Xixia Basin (or Xinping-Chimei Basin), Xixia, Henan, China | Zhaoying   | 85                   | 37.85                         | Fang et al. (2007)                           |
| D       | Xixia Basin (or Xinping-Chimei Basin), Xixia, Henan, China | Zhoumagang | 90                   | 38.60                         | Fang et al. (2007)                           |
| D       | Taohe, Xichuan, Henan, China                               | Majiacun   | 85                   | 37.85                         | Zhao and Zhao (1998)                         |
| D       | Dashiqiao, Xichuan, Henan, China                           | Gaogou     | 90                   | 38.40                         | Zhao and Zhao (1998)                         |

| Ootaxon | Locality                                   | Formation          | Approximate age (Ma) | Approximate paleolatitude (°) | Example of references     |
|---------|--------------------------------------------|--------------------|----------------------|-------------------------------|---------------------------|
| D       | Yunxian, Hubei, China                      | Gaogou             | 90                   | 37.70                         | Zhou et al. (1998)        |
| D       | Heshui, Hubei, China                       | Gong-An-Zhai       | 80                   | 35.70                         | Zhao and Li (1988)        |
| D       | Western Dongting Basin, Hunan, China       | Fenshuiao          | 80                   | 32.80                         | Zeng and Zhang (1979)     |
| D       | Tiantai Basin, Zhejiang, China             | Chichengshan       | 95                   | 36.30                         | Fang et al. (1998; 2000)  |
| D       | Khermeen Tsav, Gobi, Mongolia              | Barungoyot/ Nemegt | 75                   | 44.95                         | Watabe et al. (2010)      |
| D       | Shilyust-Ula, Gobi, Mongolia               | ?Barungoyot        | 75                   | 45.20                         | Mikhailov (1994a)         |
| D       | Bayn Shire, Gobi, Mongolia                 | Baynshire          | 85                   | 48.00                         | Watabe et al. (2010)      |
| D       | Abdrant Nuru, Gobi, Mongolia               | ?Djadokhta         | 70                   | 46.60                         | Watabe (2004)             |
| D       | Khaichin Ula, Gobi, Mongolia               | Nemegt             | 70                   | 45.90                         | Suzuki and Watabe (2000b) |
| D       | Yagaan Khovil, Gobi, Mongolia              | ?Nemegt            | 70                   | 45.50                         | Watabe et al. (2010)      |
| D       | Shiwa Bay, Whaseong, Gyeonggi, South Korea | Shiwa              | 120                  | 41.50                         | Lee (2003)                |
| D       | Porto das Barcas, near                     | Lourinha           | 150                  | 26.70                         | Ribeiro et al. (2014)     |

| Ootaxon | Locality                                                     | Formation                                                   | Approximate age (Ma) | Approximate paleolatitude (°) | Example of references  |
|---------|--------------------------------------------------------------|-------------------------------------------------------------|----------------------|-------------------------------|------------------------|
|         | Lourinha, Portugal                                           |                                                             |                      |                               |                        |
| E       | Maoming Basin, Guangdong, China                              | Tongguling                                                  | 80                   | 26.20                         | Zhang and Huang (1999) |
| E       | Nanxiong Basin (or Nanxiong-Shixing Basin), Guangdong, China | Dongyuan, Nanxiong, Pingling, Yuanpu, Zhenshui, and Zhutian | 65                   | 30.35                         | Fang et al. (2009)     |
| E       | Sanshui-Guangzhou Basin, Guangdong, China                    | Sanshui                                                     | 85                   | 28.10                         | Zhang and Huang (1999) |
| E       | Heyuan Basin, Guangdong, China                               | Nanxiong and Dongyuan                                       | 65                   | 29.10                         | Zhang and Huang (1999) |
| E       | Liguanqiao Basin, Henan, China                               | Sigou (or Luyemiao or Hugang)                               | 75                   | 36.80                         | Liang et al. (2009)    |
| E       | Lingbao Basin, Henan, China                                  | Sigou (or Luyemiao or Hugang)                               | 75                   | 38.35                         | Liang et al. (2009)    |
| E       | Luanchuan, Tantou Basin, Henan, China                        | Quipa                                                       | 65                   | 38.55                         | Tanaka et al. (2011)   |
| E       | Tantou Basin, Henan, China                                   | Sigou (or Luyemiao or Hugang)                               | 75                   | 38.00                         | Liang et al. (2009)    |
| E       | Xichuan Basin, Henan,                                        | Majiacun                                                    | 85                   | 37.70                         | Zhao and Zhao          |

| Ootaxon | Locality                                                   | Formation                     | Approximate age (Ma) | Approximate paleolatitude (°) | Example of references          |
|---------|------------------------------------------------------------|-------------------------------|----------------------|-------------------------------|--------------------------------|
|         | China                                                      |                               |                      |                               | (1998)                         |
| E       | Xichuan Basin, Henan, China                                | Sigou (or Luyemiao or Hugang) | 75                   | 37.15                         | Liang et al. (2009)            |
| E       | Xixia Basin (or Xinping-Chimei Basin), Xixia, Henan, China | Zhaoying                      | 85                   | 37.85                         | Fang et al. (2007)             |
| E       | Xixia Basin (or Xinping-Chimei Basin), Xixia, Henan, China | Gaogou (or Zoumagang)         | 90                   | 38.60                         | Liang et al. (2009)            |
| E       | Western Dongting Basin, Hunan, China                       | Fenshuiao                     | 80                   | 32.80                         | Zeng and Zhang (1979)          |
| E       | Bayan Mandahu, Inner Mongolia, China                       | Djadokhta                     | 70                   | 44.70                         | Dong and Currie (1996)         |
| E       | Pingxiang Basin, Jiangxi, China                            | Zhoutian                      | 80                   | 32.00                         | Wang et al. (2013)             |
| E       | Ganzhou, Jiangxi, China                                    | Nanxiong                      | 65                   | 31.20                         | Cheng et al. (2008); Ji (2009) |
| E       | Badaohao, Heishan, Liaoning, China                         | Shahai                        | 110                  | 44.00                         | Zhao and Zhao (1999)           |
| E       | Laiyang-Zhucheng,                                          | Jiangjunding                  | 85                   | 42.85                         | Zhao et al. (2013)             |

| Ootaxon | Locality                               | Formation                                 | Approximate age (Ma) | Approximate paleolatitude (°) | Example of references |
|---------|----------------------------------------|-------------------------------------------|----------------------|-------------------------------|-----------------------|
|         | Shangdong, China                       | Formation in the Wangshi Group            |                      |                               |                       |
| E       | Laiyang-Zhucheng, Shangdong, China     | Jingangkou Formation in the Wangshi Group | 75                   | 42.40                         | Zhao et al. (2013)    |
| E       | Tiantai Basin, Zhejiang, China         | Chichengshan                              | 90                   | 35.80                         | Wang et al. (2010)    |
| E       | Tiantai Basin, Zhejiang, China         | Liangtoutang                              | 100                  | 36.90                         | Jin et al. (2007)     |
| E       | Lavariya Muwada, Kheda, Gujarat, India | Lameta                                    | 65                   | -19.85                        | Mohabey (1998)        |
| E       | Kamitaki, Tamba, Hyogo, Japan          | 'Lower Formation' of Sasayama Group       | 110                  | 49.00                         | Tanaka et al. (2016)  |
| E       | Northern Sayr, Nemegt, Gobi, Mongolia  | Baruungoyot                               | 75                   | 45.15                         | Fanti et al. (2012)   |
| E       | Khermeen Tsav, Gobi, Mongolia          | Barungoyot/ Nemegt                        | 75                   | 44.95                         | Watabe et al. (2010)  |
| E       | Ikh-Shunkht, Gobi, Mongolia            | ?Barun-Goyot                              | 75                   | 46.60                         | Mikhailov (1994b)     |
| E       | Bayn Shire, Gobi, Mongolia             | Baynshire                                 | 85                   | 48.00                         | Watabe et al. (2010)  |



| Ootaxon | Locality                                    | Formation           | Approximate age (Ma) | Approximate paleolatitude (°) | Example of references                            |
|---------|---------------------------------------------|---------------------|----------------------|-------------------------------|--------------------------------------------------|
| E       | Mongot, Gobi, Mongolia                      | Djadokhta           | 70                   | 46.40                         | Suzuki and Watabe (2000b)                        |
| E       | Ukhaa Tolgod, Mongolia                      | Djadokhta           | 70                   | 45.30                         | Norell et al. (1994; 2001)                       |
| E       | Bayn Dzak, Gobi, Mongolia                   | Djadokhta           | 70                   | 46.40                         | Suzuki and Watabe (2000b)                        |
| E       | Bortolgoi, Gobi, Mongolia                   | Djadokhta           | 70                   | 46.20                         | Watabe et al. (2010)                             |
| E       | Dzamin Khond, Gobi, Mongolia                | Djadokhta           | 70                   | 46.30                         | Suzuki and Watabe (2000b)                        |
| E       | Tugrikin Shire, Gobi, Mongolia              | Djadokhta           | 70                   | 46.50                         | Watabe et al. (2010)                             |
| E       | Abdrant Nuru, Gobi, Mongolia                | ?Djadokhta          | 70                   | 46.70                         | Watabe (2004)                                    |
| E       | Udan-Sayr, Gobi, Mongolia                   | Djadokhta           | 70                   | 46.40                         | Mikhailov (1994b)                                |
| E       | Buylyasutuin-Khuduk, Ubur-Khangay, Mongolia | Dushi Ula (Doshuul) | 120                  | 43.10                         | Kurzanov and Mikhailov (1989); Mikhailov (1994b) |
| E       | Bugin-Tsav, Gobi, Mongolia                  | Nemegt              | 70                   | 45.50                         | Weishampel et al. (2008)                         |
| E       | Guriliyn-Tsav, Gobi,                        | Nemegt              | 70                   | 46.10                         | Mikhailov (1994b)                                |

| Ootaxon | Locality                                        | Formation        | Approximate age (Ma) | Approximate paleolatitude (°) | Example of references     |
|---------|-------------------------------------------------|------------------|----------------------|-------------------------------|---------------------------|
|         | Mongolia                                        |                  |                      |                               |                           |
| E       | Khaichin Ula, Gobi, Mongolia                    | Nemegt           | 70                   | 45.90                         | Suzuki and Watabe (2000b) |
| E       | Khermeen Tsav-II, Gobi, Mongolia                | Nemegt           | 70                   | 45.50                         | Watabe et al. (2010)      |
| E       | Shar Tsav, Gobi, Mongolia                       | Nemegt           | 70                   | 46.90                         | Watabe et al. (2010)      |
| E       | Tsagan-Khushu, Gobi, Mongolia                   | Nemegt           | 70                   | 45.40                         | Mikhailov (1994b)         |
| E       | Yagaan Khovil, Gobi, Mongolia                   | ?Nemegt          | 70                   | 46.30                         | Watabe et al. (2010)      |
| E       | Busan, South Korea                              | Dadaepo          | 75                   | 41.90                         | Paik et al. (2012)        |
| E       | Tongyeong, Gyeongsang, South Korea              | Goseong          | 75                   | 41.60                         | Kim et al. (2011)         |
| E       | Aphae-do, Shinan-gun, Jeollanam-do, South Korea | Gyeongsang Basin | 80                   | 41.00                         | Huh et al. (2014)         |
| E       | Shiwa Bay, Whaseong, Gyeonggi, South Korea      | Shiwa            | 120                  | 41.40                         | Lee (2003)                |
| E       | Teruel, Spain                                   | Blesa            | 130                  | 25.60                         | Canudo et al. (2010)      |
| E       | Bonneville County, Idaho, USA                   | Wayan            | 109.0–99.7           | 43.30                         | Krumenacker et al. (2016) |

| Ootaxon | Locality                                                                                                                                                  | Formation      | Approximate age (Ma) | Approximate paleolatitude (°) | Example of references    |
|---------|-----------------------------------------------------------------------------------------------------------------------------------------------------------|----------------|----------------------|-------------------------------|--------------------------|
| E       | Pancake and Fish Creek Ranges, Nevada, USA                                                                                                                | Newark Canyon  | 125.5– 99.7          | 41.90                         | Bonde et al. (2015)      |
| E       | Castle Dale, Emery County, Utah                                                                                                                           | Cedar Mountain | 105.3– 94.3          | 39.70                         | Zelenitsky et al. (2000) |
| E       | Section 4 Site 7, Kitchen Locality, Sauropod Locality, Sauropod One Egg, Pond Locality, Lizard Locality, and North Horn Mountain, Emery County, Utah, USA | North Horn     | 70.6–66.0            | 47.20                         | Bray (1999)              |
| E       | UCM Loc. #78203, Emery County, Utah, USA                                                                                                                  | Dakota         | 105.3–94.3           | 39.70                         | Zelenitsky et al. (2000) |
| Fa      | Qinglongshan, Yunxian, Hubei, China                                                                                                                       | Gaogou         | 90                   | 37.70                         | Zhou et al. (1998)       |
| Fa      | Pingxiang Basin, Jiagxi, China                                                                                                                            | Zhoutian       | 80                   | 32.00                         | Zou et al. (2013)        |
| Fa      | Tiantai, Zhejiang, China                                                                                                                                  | Laijia         | 95                   | 36.35                         | Zhang (2010)             |
| Fa      | Algui Ulan Tsav, Gobi, Mongolia                                                                                                                           | NA             | 115                  | 44.25                         | Watabe et al. (2010)     |
| Fa      | Ologoy-Ulan-Tsav, Gobi,                                                                                                                                   | Barungoyot     | 75                   | 47.10                         | Sochava (1969);          |

| Ootaxon | Locality                                                         | Formation  | Approximate age (Ma) | Approximate paleolatitude (°) | Example of references                                         |
|---------|------------------------------------------------------------------|------------|----------------------|-------------------------------|---------------------------------------------------------------|
|         | Mongolia                                                         |            |                      |                               | Mikhailov (1994a)                                             |
| Fa      | Bosung County, Chullanam-do Province, South Korea                | Seonso     | 80                   | 41.00                         | Huh and Zelenitsky (2002)                                     |
| Fa      | Coast of Sinsudo Island, Samcheonpo, South Korea                 | Haman      | 100                  | 43.20                         | Paik et al. (2012)                                            |
| Fa      | Hanyom, Sihwa Basin, South Korea                                 | Sihwa      | 120                  | 41.50                         | Kim et al. (2009)                                             |
| Fa      | Ojo de Agua, Rio Negro, Argentina                                | Allen      | 75                   | -44.05                        | Salgado et al. (2007)                                         |
| Fa      | Salitral de Santa Rosa-Salinas de Trapalco, Rio Negro, Argentina | Allen      | 75                   | -44.85                        | Salgado et al. (2007)                                         |
| Fa      | Sanagasta, La Rioja, Argentina                                   | Los Llanos | 125                  | -26.10                        | Grellet-Tinner and Fiorelli (2010);<br>Fiorelli et al. (2012) |
| Fa      | Colonia, 12a. Police Section, stream Miguelete Tala, Uruguay     | Asencio    | 95                   | -38.75                        | Mones (1980)                                                  |
| Fa      | Quebracho, Paysandu, Uruguay                                     | Guichon    | 100                  | -36.10                        | Soto et al. (2012)                                            |

| Ootaxon | Locality                                            | Formation                               | Approximate age (Ma) | Approximate paleolatitude (°) | Example of references             |
|---------|-----------------------------------------------------|-----------------------------------------|----------------------|-------------------------------|-----------------------------------|
| Me      | Douar Lgara, Tendirara High Plateaus, Morocco       | Tendirara red beds                      | 65                   | 19.15                         | Chassagne-Manoukian et al. (2013) |
| Me      | Oukdiksou syncline, Morocco                         | Irbzer                                  | 65                   | 19.95                         | Garcia et al. (2003)              |
| Me      | TZ-07, Mbeya District, Tanzania                     | Galula Formation of Red Sandstone Group | 105                  | -28.70                        | Gottfried et al. (2004)           |
| Me      | Rahioli and Balasinor region, Kheda, Gujarat, India | Lameta                                  | 65                   | -19.85                        | Srivastava et al. (1986)          |
| Me      | Anjar, Kachchh, Gujarat, India                      | Lameta                                  | 65                   | -18.30                        | Khosla and Sahni (1995)           |
| Me      | Jhabua, Madhya Pradesh, India                       | Lameta                                  | 65                   | -20.40                        | Khosla and Sahni (1995)           |
| Me      | Khempur, Kheda, Gujarat, India                      | Lameta                                  | 65                   | -18.30                        | Khosla and Sahni (1995)           |
| Me      | Dohad, Panchmahals, Gujarat, India                  | Lameta                                  | 65                   | -20.25                        | Mohabey and Mathur (1989)         |
| Me      | Dhar, Madhya Pradesh, India                         | Lameta                                  | 65                   | -20.80                        | Khosla and Sahni                  |

| Ootaxon | Locality                               | Formation                                         | Approximate age (Ma) | Approximate paleolatitude (°) | Example of references          |
|---------|----------------------------------------|---------------------------------------------------|----------------------|-------------------------------|--------------------------------|
|         | India                                  |                                                   |                      |                               | (1995)                         |
| Me      | Padiyal, Madhya Pradesh, India         | Lameta                                            | 65                   | -20.95                        | Khosla and Sahni (1995)        |
| Me      | Jabalpur, Madhya Pradesh, India        | Lameta                                            | 65                   | -21.55                        | Khosla and Sahni (1995)        |
| Me      | Amravati, Maharashtra, India           | Lameta                                            | 65                   | -23.10                        | Srivastava and Mankar (2015)   |
| Me      | Chandrapur, Maharashtra, India         | Lameta                                            | 65                   | -24.50                        | Mohabey (1996; 1998)           |
| Me      | Durlston Bay, Swanage, Dorset, England | Chery Freshwater Member of the Lulworth Formation | 140                  | 33.10                         | Ensom (1996)                   |
| Me      | Aix-en-Provence region, France         | NA                                                | 75                   | 33.20                         | Vianey-Liaud et al. (1994)     |
| Me      | Aix-en-Provence region, France         | NA                                                | 65                   | 32.45                         | Vianey-Liaud et al. (1994)     |
| Me      | Aude region, France                    | Red Marls of Maurine                              | 65                   | 32.00                         | Fondevilla et al. (2016)       |
| Me      | Hateg Basin, Romania                   | Densus-Ciula                                      | 70.6–66.0            | 32.70                         | Grigorescu et al. (1994; 2010) |

| Ootaxon | Locality                                                         | Formation    | Approximate age (Ma) | Approximate paleolatitude (°) | Example of references                         |
|---------|------------------------------------------------------------------|--------------|----------------------|-------------------------------|-----------------------------------------------|
| Me      | Southern Pyrenees region (e.g., Coll de Nargo and Tremp), Spain  | Aren         | 70                   | 30.00                         | Sanz et al. (1995); Diaz-Molina et al. (2007) |
| Me      | Southern Pyrenees region (e.g., Coll de Nargo and Tremp), Spain  | Tremp        | 65                   | 29.65                         | Vianey-Liaud and Lopez-Martinez (1997)        |
| Me      | Auca Mahuevo, Neuquen Province, Patagonia, Argentina             | Anacleto     | 80                   | -42.30                        | Chiappe et al. (1998)                         |
| Me      | Arrigada I, Salitral Ojo de Agua, Rio Negro, Argentina           | Allen        | 75                   | -44.05                        | Salgado et al. (2007)                         |
| Me      | Salitral de Santa Rosa-Salinas de Trapalco, Rio Negro, Argentina | Allen        | 75                   | -44.85                        | Salgado et al. (2007)                         |
| Me      | Bajo de Arriagada, Patagonia, Rio Negro, Argentina               | Allen        | 75                   | -44.00                        | Genise and Sarzetti (2011)                    |
| Me      | Neuquen, Neuquen, Patagonia, Argentina                           | Rio Colorado | 85                   | -43.85                        | Calvo et al. (1997)                           |
| Me      | Sierra de Los Llanos, La                                         | Los Llanos   | 80                   | -35.50                        | Hechenleitner et al.                          |

| Ootaxon | Locality                                                 | Formation        | Approximate age (Ma) | Approximate paleolatitude (°) | Example of references                       |
|---------|----------------------------------------------------------|------------------|----------------------|-------------------------------|---------------------------------------------|
|         | Rioja, Argentina                                         |                  |                      |                               | (2016); Basilici et al. (2017)              |
| Me      | Baruru Basin, Marilia County, San Paulo State, Brazil    | Marilia          | 65                   | -29.95                        | Ribeiro (2002)                              |
| Me      | Laguna Umayo, Bagua Basin, Peru                          | Fundo El Triunfo | 75                   | -21.10                        | Vianey-Liaud et al. (1997; 2003)            |
| Pre     | Casal da Rola, near Lourinha, Portugal                   | Lourinha         | 150                  | 28.60                         | Ribeiro et al. (2014)                       |
| Pre     | Pai Mogo, Lourinha, Portugal                             | Lourinha         | 150                  | 28.40                         | Mateus et al. (1997); Antunes et al. (1998) |
| Pre     | Freemont County, Colorado, USA                           | Morrison         | 155.7–145.5          | 34.00                         | Zelenitsky (2004)                           |
| Pre     | Delta and Montrose County, Colorado, USA                 | Morrison         | 155.7–150.8          | 33.70                         | Hirsch (1994)                               |
| Pre     | Cleveland-Lloyd Dinosaur Quarry, Emery County, Utah, USA | Morrison         | 155.7–150.8          | 34.90                         | Hirsch et al. (1989); Hirsch (1994)         |
| Pre     | Fox Mesa, Wyoming, USA                                   | Morrison         | 155.7–145.5          | 40.30                         | Carrano et al. (2013)                       |
| Pri     | Oukdiksou syncline,                                      | Irbzer           | 65                   | 19.95                         | Garcia et al. (2003)                        |



| Ootaxon | Locality                                                   | Formation               | Approximate age (Ma) | Approximate paleolatitude (°) | Example of references                                        |
|---------|------------------------------------------------------------|-------------------------|----------------------|-------------------------------|--------------------------------------------------------------|
|         | Morocco                                                    |                         |                      |                               |                                                              |
| Pri     | Heyuan Basin, Guangdong, China                             | Dongyuan                | 65                   | 29.10                         | Lü et al. (2006);<br>Tanaka et al. (2012)                    |
| Pri     | Xixia Basin (or Xinping-Chimei Basin), Xixia, Henan, China | Majiacun (or Zhaoying)  | 85                   | 37.85                         | Liang et al. (2009)                                          |
| Pri     | Xixia Basin (or Xinping-Chimei Basin), Xixia, Henan, China | Gaogou                  | 90                   | 38.60                         | Wang and Zhou (1995)                                         |
| Pri     | Hejiagou, Yunxian, Hubei, China                            | Gaogou                  | 90                   | 37.70                         | Zhou et al. (1998)                                           |
| Pri     | Bayan Mandahu, Urad Houqi, Inner Mongolia, China           | Djadokhta               | 70                   | 44.70                         | Zhao and Li (1993)                                           |
| Pri     | Ganzhou, Jiangxi, China                                    | Nanxiong                | 65                   | 31.20                         | Tanaka pers. obs. at Ganzhou Museum, Jiangxi Province, China |
| Pri     | Tiantai Basin, Zhejiang, China                             | Chichengshan and Laijia | 95                   | 36.35                         | Fang et al. (2000; 2003); Wang et al.                        |

| Ootaxon | Locality                                                    | Formation                           | Approximate age (Ma) | Approximate paleolatitude (°) | Example of references     |
|---------|-------------------------------------------------------------|-------------------------------------|----------------------|-------------------------------|---------------------------|
|         |                                                             |                                     |                      |                               | (2011)                    |
| Pri     | Tiantai Basin, Zhejiang, China                              | Liangtoutang                        | 100                  | 36.90                         | Varricchio et al. (2015)  |
| Pri     | Kamitaki, Tamba, Hyogo, Japan                               | 'Lower Formation' of Sasayama Group | 110                  | 49.00                         | Tanaka et al. (2016)      |
| Pri     | Khermin-Tsav, Gobi, Mongolia                                | Barun-Goyot                         | 75                   | 45.25                         | Mikhailov (1994b)         |
| Pri     | Baga-Tariach, Gobi, Mongolia                                | Dzhadokhta                          | 70                   | 48.90                         | Mikhailov (1994b)         |
| Pri     | Tugrikin Shire, Gobi, Mongolia                              | Djadokhta                           | 70                   | 46.50                         | Watabe et al. (2010)      |
| Pri     | Zhinst Tolgoi, Udyn Sayr, Gobi, Mongolia                    | Djadokhta                           | 70                   | 46.40                         | Suzuki and Watabe (2000a) |
| Pri     | Bayn Dzak, Gobi, Mongolia                                   | Djadokhta                           | 70                   | 46.50                         | Watabe et al. (2010)      |
| Pri     | Khashaat, Gobi, Mongolia                                    | Dzhadokhta                          | 70                   | 46.50                         | Sabath (1991)             |
| Pri     | Altan Ula IV, Gobi, Mongolia                                | Nemegt                              | 70                   | 45.50                         | Sabath (1991)             |
| Pri     | Kakanaut, Koryak Upland, Chukotka Autonomous Region, Russia | Kakanaut                            | 65                   | 76.70                         | Godefroit et al. (2009)   |

| Ootaxon | Locality                                                        | Formation              | Approximate age (Ma) | Approximate paleolatitude (°) | Example of references                                 |
|---------|-----------------------------------------------------------------|------------------------|----------------------|-------------------------------|-------------------------------------------------------|
| Pri     | Herault region, France                                          | Villeveyrac-Meze Basin | 75                   | 32.85                         | Garcia et al. (2000)                                  |
| Pri     | Aix-en-Provence region, France                                  | NA                     | 75                   | 32.95                         | Garcia et al. (2000)                                  |
| Pri     | Teruel, Spain                                                   | Belsa                  | 130                  | 25.60                         | Canudo et al. (2010);<br>Moreno-Azanza et al. (2014b) |
| Pri     | Southern Pyrenees region (e.g., Coll de Nargo and Tremp), Spain | Tremp                  | 65                   | 29.65                         | Vianey-Liaud and Lopez-Martinez (1997)                |
| Pri     | Southern Pyrenees region (e.g., Coll de Nargo and Tremp), Spain | Aren                   | 70                   | 30.00                         | Lopez-Martinez and Vicens (2012)                      |
| Pri     | Dinosaur Provincial Park, Alberta                               | Dinosaur Park          | 75                   | 57.05                         | Zelenitsky and Sloboda (2005)                         |
| Pri     | Devil's Coulee, Alberta, Canada                                 | Oldman                 | 75                   | 56.05                         | Zelenitsky and Hills (1996)                           |
| Pri     | Todd Creek area, Alberta Canada                                 | Willow Creek           | 65                   | 55.65                         | Zelenitsky et al. (2017b)                             |
| Pri     | Verdigris Coulee, Alberta,                                      | Milk River             | 85                   | 54.35                         | Zelenitsky et al.                                     |

| Ootaxon | Locality                                                                                   | Formation    | Approximate age (Ma) | Approximate paleolatitude (°) | Example of references         |
|---------|--------------------------------------------------------------------------------------------|--------------|----------------------|-------------------------------|-------------------------------|
|         | Canada                                                                                     |              |                      |                               | (2017a)                       |
| Pri     | Near Choteau, Teton County, Montana; Glacier County, Montana, USA                          | Two Medicine | 75                   | 54.55                         | Varricchio et al. (2002)      |
| Pri     | First Find Microsite, Sevenmile Hill outcrops, Teton County, Montana, USA                  | Two Medicine | 80                   | 54.00                         | Jackson and Varricchio (2010) |
| Pri     | Hill County, Montana, USA                                                                  | Judith River | 75                   | 54.75                         | Jackson et al. (2010)         |
| Pri     | Bone Hill Locality, Red Rock Locality, Teton County, Montana; Glacier County, Montana, USA | Two Medicine | 85                   | 53.10                         | Hirsch and Quinn (1990)       |
| Pri     | NMMNH L-4010, Bisti/Denazin Wilderness area, San Juan Basin, New Mexico, USA               | Fruitland    | 84.9–70.6            | 43.60                         | Tanaka et al. (2011)          |
| Pri     | Lizard and Sauropod localities, Emery County, Utah, USA                                    | North Horn   | 70.6–66.0            | 47.20                         | Bray (1999)                   |

| Ootaxon | Locality                                                     | Formation              | Approximate age (Ma) | Approximate paleolatitude (°) | Example of references           |
|---------|--------------------------------------------------------------|------------------------|----------------------|-------------------------------|---------------------------------|
| Pri     | UCM L79059, Mudbank Site 1.2, Emery County, Utah, USA        | North Horn             | 70.6–66.0            | 46.10                         | Bray (1999)                     |
| Pri     | El Pantano, Coahuila, Mexico                                 | Cerro del Pueblo       | 84.9–70.6            | 31.80                         | Aguillon-Martinez et al. (2004) |
| Sp      | Heyuan Bsin, Guangdong, China                                | Nanxiong               | 65                   | 29.10                         | Zhang and Huang (1999)          |
| Sp      | Maoming Basin, Guangdong, China                              | Tongguling             | 80                   | 25.65                         | Zhang and Huang (1999)          |
| Sp      | Nanxiong Basin (or Nanxiong-Shixing Basin), Guangdong, China | Nanxiong and Pingling  | 65                   | 30.35                         | Zhang and Huang (1999)          |
| Sp      | Sanshui-Guangzhou Basin, Guangdong, China                    | Sanshui                | 90                   | 28.80                         | Zhang and Huang (1999)          |
| Sp      | Sanshui-Guangzhou Basin, Guangdong, China                    | Baihedong Group        | 125                  | 26.25                         | Zhang and Huang (1999)          |
| Sp      | Loushan Basin, Henan, China                                  | Majiacun (or Zhaoying) | 85                   | 37.25                         | Liang et al. (2009)             |
| Sp      | Wulichuan Basin, Henan, China                                | Majiacun (or Zhaoying) | 85                   | 38.35                         | Liang et al. (2009)             |

| Ootaxon | Locality                                                   | Formation                     | Approximate age (Ma) | Approximate paleolatitude (°) | Example of references |
|---------|------------------------------------------------------------|-------------------------------|----------------------|-------------------------------|-----------------------|
| Sp      | Wulichuan Basin, Henan, China                              | Gaogou (or Zoumagang)         | 90                   | 39.00                         | Liang et al. (2009)   |
| Sp      | Xiaguan Basin, Henan, China                                | Majiacun (or Zhaoying)        | 85                   | 37.90                         | Liang et al. (2009)   |
| Sp      | Xichuan Basin, Henan, China                                | Majiacun (or Zhaoying)        | 85                   | 37.70                         | Liang et al. (2009)   |
| Sp      | Xichuan Basin, Henan, China                                | Gaogou (or Zoumagang)         | 90                   | 38.40                         | Liang et al. (2009)   |
| Sp      | Xixia Basin (or Xinping-Chimei Basin), Xixia, Henan, China | Majiacun (or Zhaoying)        | 85                   | 37.85                         | Liang et al. (2009)   |
| Sp      | Xixia Basin (or Xinping-Chimei Basin), Xixia, Henan, China | Gaogou (or Zoumagang)         | 90                   | 38.60                         | Liang et al. (2009)   |
| Sp      | Xixia Basin (or Xinping-Chimei Basin), Xixia, Henan, China | Sigou (or Luyemiao or Hugang) | 75                   | 37.25                         | Liang et al. (2009)   |
| Sp      | Yangji Basin, Henan, China                                 | Majiacun (or Zhaoying)        | 85                   | 38.10                         | Liang et al. (2009)   |
| Sp      | Qinglongshan, Yunxian,                                     | Gaogou                        | 90                   | 37.70                         | Zhou et al. (1998)    |

| Ootaxon | Locality                                    | Formation                                   | Approximate age (Ma) | Approximate paleolatitude (°) | Example of references                        |
|---------|---------------------------------------------|---------------------------------------------|----------------------|-------------------------------|----------------------------------------------|
|         | Hubei, China                                |                                             |                      |                               |                                              |
| Sp      | Changtu, Liaoning, China                    | Quantou                                     | 110                  | 45.40                         | Liu et al. (2013)                            |
| Sp      | Laiyang-Zhucheng, Shandong, China           | Jiangjunding Formation in the Wangshi Group | 85                   | 42.85                         | Young (1965); Zhao and Jiang (1974)          |
| Sp      | Laiyang-Zhucheng, Shandong, China           | Jingangkou Formation in the Wangshi Group   | 75                   | 41.25                         | Zhao et al. (2013)                           |
| Sp      | Tiantai Basin, Zhejiang, China              | Chichengshan and Laijia                     | 95                   | 36.35                         | Fang et al. (2003; 2000); Wang et al. (2011) |
| Sp      | Kholdoda and Chandrapur, Maharashtra, India | Lameta                                      | 65                   | -22.45                        | Mohabey (1996; 2001)                         |
| Sp      | Kamitaki, Tamba, Hyogo, Japan               | 'Lower Formation' of Sasayama Group         | 110                  | 49.00                         | Tanaka et al. (2016)                         |
| Sp      | Shiluut Ula, Gobi, Mongolia                 | Barungoyot                                  | 75                   | 45.20                         | Watabe et al. (2010)                         |
| Sp      | Abdrant Nuru, Gobi, Mongolia                | ?Djadokhta                                  | 70                   | 46.60                         | Watabe (2004)                                |
| Sp      | Baga-Tariach, Gobi,                         | Djadokhta                                   | 70                   | 48.90                         | Mikhailov (1994a)                            |

| Ootaxon | Locality                                                    | Formation                                    | Approximate age (Ma) | Approximate paleolatitude (°) | Example of references        |
|---------|-------------------------------------------------------------|----------------------------------------------|----------------------|-------------------------------|------------------------------|
|         | Mongolia                                                    |                                              |                      |                               |                              |
| Sp      | Bortolgoi, Gobi, Mongolia                                   | Djadokhta                                    | 70                   | 46.20                         | Watabe et al. (2010)         |
| Sp      | Dzamin Khond, Gobi, Mongolia                                | Djadokhta                                    | 70                   | 46.30                         | Watabe et al. (2010)         |
|         | Mongolia                                                    |                                              |                      |                               |                              |
| Sp      | Dragon's Tomb' dinosaur locality, Gobi, Mongolia            | Nemegt                                       | 70                   | 45.40                         | Dewaele et al. (2015)        |
| Sp      | Shar Tsav, Gobi, Mongolia                                   | Nemegt                                       | 70                   | 46.80                         | Watabe et al. (2010)         |
| Sp      | Yagaan Khovil, Gobi, Mongolia                               | ?Nemegt                                      | 70                   | 46.20                         | Watabe et al. (2010)         |
|         | Mongolia                                                    |                                              |                      |                               |                              |
| Sp      | Kakanaut, Koryak Upland, Chukotka Autonomous Region, Russia | Kakanaut                                     | 65                   | 76.70                         | Godefroit et al. (2009)      |
| Sp      | Bosung, Chullanam-do, South Korea                           | Seonso                                       | 80                   | 41.00                         | Huh and Zelenitsky (2002)    |
| Sp      | Goseong, South Korea                                        | Goseong                                      | 75                   | 41.60                         | Paik et al. (2012)           |
| Sp      | Teruel, Spain                                               | Blesa                                        | 130                  | 25.60                         | Moreno-Azanza et al. (2014a) |
| Sp      | Teruel, Spain                                               | Camarillas, Marambel, and Upper El Castellar | 130                  | 25.50                         | Moreno-Azanza et al. (2014a) |



| Ootaxon | Locality                                                        | Formation                | Approximate age (Ma) | Approximate paleolatitude (°) | Example of references         |
|---------|-----------------------------------------------------------------|--------------------------|----------------------|-------------------------------|-------------------------------|
| Sp      | Southern Pyrenees region (e.g., Coll de Nargo and Tremp), Spain | Tremp                    | 65                   | 29.65                         | Sellés et al. (2014)          |
| Sp      | Dinosaur Provincial Park, Alberta                               | Dinosaur Park and Oldman | 75                   | 57.05                         | Zelenitsky and Sloboda (2005) |
| Sp      | Devil's Coulee, Alberta, Canada                                 | Oldman                   | 75                   | 56.05                         | Zelenitsky and Hills (1997)   |
| Sp      | Knight's Ranch, Alberta, Canada                                 | Oldman                   | 75                   | 55.95                         | Zelenitsky and Hills (1997)   |
| Sp      | Whiskey Gap area and Todd Creek area, Alberta Canada            | Willow Creek             | 65                   | 55.65                         | Zelenitsky et al. (2017b)     |
| Sp      | Verdigris Coulee, Alberta, Canada                               | Milk River               | 85                   | 54.35                         | Zelenitsky et al. (2017a)     |
| Sp      | Near Choteau, Teton County, Montana, USA                        | Two Medicine             | 75                   | 54.55                         | Horner and Makela (1979)      |
| Sp      | Sevenmile Hill, Teton County, Montana, USA                      | Two Medicine             | 80                   | 54.00                         | Jackson and Varrichhio (2010) |
| Sp      | Blacktail Creek, Glacier County, Montana, USA                   | Two Medicine             | 75                   | 55.35                         | Horner and Currie (1994)      |
| Sp      | One Place Locality, Red                                         | Two Medicine             | 85                   | 53.10                         | Hirsch and Quinn              |

| Ootaxon | Locality                                                      | Formation        | Approximate age (Ma) | Approximate paleolatitude (°) | Example of references           |
|---------|---------------------------------------------------------------|------------------|----------------------|-------------------------------|---------------------------------|
|         | Rock Locality, Teton County, Montana; Glacier County, Montana |                  |                      |                               | (1990)                          |
| Sp      | Lizard Locality, Emery County, Utah, USA                      | North Horn       | 70.6–66.0            | 47.20                         | Bray (1999)                     |
| Sp      | El Pantano, Coahuila, Mexico                                  | Cerro del Pueblo | 84.9–70.6            | 31.80                         | Aguillon-Martinez et al. (2004) |

## References

- Agnolin, F.L., Powell, J.E., Novas, F.E. and Kundrat, M., 2012. New alvarezsaurid (Dinosauria, Theropoda) from uppermost Cretaceous of north-western Patagonia with associated eggs. *Cretaceous Research* 35: 33-56.
- Aguillon-Martinez, M., Zelenitsky, D.K., Brinkman, D. and Eberth, D., 2004. Eggshell fragments from the Uppermost Cerro del Pueblo Formation (Upper Cretaceous; Mexico). *Journal of Vertebrate Paleontology* 24: 33A.
- Allsteadt, J., 1994. Nesting ecology of *Caiman crocodilus* in Cano Negro, Costa Rica. *Journal of Herpetology* 28: 12-19.
- Antunes, M.T., Taquet, P.V. and Ribeiro, V., 1998. Upper Jurassic dinosaur and crocodile eggs from Pai Mogo nesting site (Lourinha - Portugal). *Memorias da Academia das Ciencias de Lisboa* 37: 83-99.
- Araujo, R., Castanhinha, R., Martins, R.M.S., Mateus, O., Hendrickx, C., Beckmann, F., Schell, N. and Alves, L.C., 2013. Filling the gaps of dinosaur eggshell phylogeny: Late Jurassic theropod clutch with embryos from Portugal. *Scientific Reports* 3: 10.1038/Srep01924.
- Argeloo, M. and Dekker, R.W.R.J., 1996. Exploitation of megapode eggs in Indonesia: the role of traditional methods in the

conservation of megapodes. *Oryx* 30: 59-64.

Baker, G.C., 1999. Temporal and spatial patterns of laying in the Moluccan megapode *Eulipoa wallacei* (G.R. Gray). *Zoologische Verhandelingen* 327: 53-60.

Baker, G.C. and Dekker, R.W.R.J., 2000. Lunar synchrony in the reproduction of the Moluccan Megapode *Megapodius wallacei*. *Ibis* 142: 382-388.

Basilici, G., Hechenleitner, E.M., Fiorelli, L.E., Dal Bo, P.F. and Mountney, N.P. 2017. Preservation of titanosaur egg clutches in Upper Cretaceous cumulative palaeosols (Los Llanos Formation, La Rioja, Argentina). *Palaeogeography, Palaeoclimatology, Palaeoecology* 482: 83-102.

Beetschen, J.-C., Dughi, R. and Sirugue, F., 1977. Sur la presence de coquilles d'œufs d'Oiseaux dans le cretace superieur des Corbieres occidentales. *Comptes Rendus de l'Académie des Sciences-Series II: A-Earth and Planetary Sciences* 284: 2491-2494.

Bezuijen, M.R., Cox, J.H., Thorbjarnarson, J.B., Phothitay, C., Hedemark, M. and Rasphone, A., 2013. Status of Siamese Crocodile (*Crocodylus siamensis*) Schneider, 1801 (Reptilia: Crocodylia) in Laos. *Journal of Herpetology* 47: 41-65.

Bolhm, T., 1982. Husbandry of Orinoco crocodiles (*Crocodylus intermedius*) in Venezuela. *Crocodiles: Proceedings of the 5th Working Meeting of the Crocodile Specialist Group, IUCN–The World Conservation Union, Gland, Switzerland*: 267-285.

Bonde, J.W., Hilton, R.P., Jackson, F.D. and Druschke, P.A., 2015. Fauna of the Newark Canyon Formation (Lower Cretaceous), east-central Nevada. *New Concepts and Discoveries* 1-2: 721-732.

Botfalvai, G., Csiki-Sava, Z., Grigorescu, D. and Vasile, S., 2017. Taphonomical and palaeoecological investigation of the Late Cretaceous (Maastrichtian) Tuştea vertebrate assemblage (Romania: Haţeg Basin) - insight into a unique dinosaur nesting locality. *Palaeogeography, Palaeoclimatology, Palaeoecology* 468: 228-262.

Bowen, J., 1996. Notes on the Vanuatu Megapode *Megapodius layardi* on Ambrym, Vanuatu. *Bird Conservation International* 6: 401-408.

- Bravo, A.M. and Gaete, R., 2015. Titanosaur eggshells from the Tremp Formation (Upper Cretaceous, Southern Pyrenees, Spain). *Historical Biology* 27: 1079-1089.
- Bray, E.S., 1999. Eggs and eggshell from the Upper Cretaceous North Horn Formation, central Utah. In: D.D. Gillette (Editor), *Vertebrate Paleontology in Utah. Geological Survey Miscellaneous Publication 99-1*, Utah, pp. 361-376.
- Bray, E.S. and Lucas, S.G., 1997. Theropod dinosaur eggshell from the Upper Jurassic of New Mexico. *New Mexico Museum of Natural History and Science Bulletin* 11: 41-43.
- Bregulla, H.L., 1992. *Birds of Vanuatu*. Anthony Nelson, Shropshire, UK, 329 pp.
- Brown, B. and Schlaikjer, E.M., 1940. The structure and relationships of *Protoceratops*. *Transactions of the New York Academy of Sciences* 2: 99-100.
- Bustard, H.R., 1980. Clutch size, incubation and hatching success of Gharial [*Gavialis gangeticus* (Gmelin)] eggs from Narayani River, Nepal, 1976-1978. *Journal of Bombay Natural History Society* 77: 100-105.
- Calvo, J.O., Engelland, S., Heredia, S.E. and Salgado, L., 1997. First record of dinosaur eggshells (?Sauropoda - Megaloolithidae) from Neuquen, Patagonia, Argentina. *Gaia* 14: 23-32.
- Canudo, J.I., Gasca, J.M., Aurell, M., Badiola, A., Blain, H.A., Cruzado-Caballero, P., Gomez-Fernandez, D., Moreno-Azanza, M., Parrilla, J., Rabal-Garces, R. and Ruiz-Omenaca, J.I., 2010. La Cantalera: an exceptional window onto the vertebrate biodiversity of the Hauterivian-Barremian transition in the Iberian Peninsula. *Journal of Iberian Geology* 36: 205-224.
- Carrano, M., Mateus, O. and Mitchell, J., 2013. First definitive association between embryonic *Allosaurus* bones and *Prismatoolithus* eggs in the Morrison Formation (Upper Jurassic, Wyoming, USA). *Journal of Vertebrate Paleontology* 33. Conference abstracts: 101.
- Chabreck, R.H., 1973. Temperature variation in nests of the American Alligator. *Herpetologica* 29: 48-51.
- Chabreck, R.H., 1975. Moisture variation in nests of the American Alligator (*Alligator mississippiensis*). *Herpetologica* 31: 385-389.
- Charruau, P., 2012. Microclimate of American Crocodile nests in Banco Chinchorro biosphere reserve, Mexico: effect on incubation

- length, embryos survival and hatchlings sex. *Journal of Thermal Biology* 37: 6-14.
- Chassagne-Manoukian, M., Haddoumi, H., Cappetta, H., Charriere, A., Feist, M., Tabuce, R. and Vianey-Liaud, M., 2013. Dating the "red beds" of the Eastern Moroccan High Plateaus: evidence from late Late Cretaceous charophytes and dinosaur eggshells. *Geobios* 46: 371-379.
- Cheng, Y.N., Jui, Q., Wu, X.C. and Shou, H.Y., 2008. Oviraptorosaurian eggs (Dinosauria) with embryonic skeletons discovered for the first time in China. *Acta Geologica Sinica* 82: 1089-1094.
- Chiappe, L.M., Coria, R.A., Dingus, L., Jackson, F., Chinsamy, A. and Fox, M., 1998. Sauropod dinosaur embryos from the late Cretaceous of Patagonia. *Nature* 396: 258-261.
- Chiappe, L.M., Dingus, L., Jackson, F.D., Grellet-Tinner, G., Coria, R., Loope, D., Clarke, J. and Garrido, A., 2001. Sauropod eggs and embryos from the Late Cretaceous of Patagonia. In: A.M. Bravo and T. Reyes (Editors), *First International Symposium on Dinosaur Eggs and Babies Extended Abstracts*, Catalonia, Spain, pp. 23-29.
- Chiappe, L.M., Schmitt, J.G., Jackson, F.D., Garrido, A., Dingus, L. and Grellet-Tinner, G., 2004. Nest structure for sauropods: sedimentary criteria for recognition of dinosaur nesting traces. *Palaios* 19: 89-95.
- Chow, M.M., 1951. Notes on the Late Cretaceous dinosaurian remains and the fossil eggs from Laiyang Shantung. *Bulletin of the Geological Society of China* 31: 89-96.
- Chow, M.M., 1954. On the microstructure of the fossil egg-shells from Laiyang, Shantung. *Acta Palaeontologica Sinica* 2: 389-394.
- Cintra, R., 1988. Nesting ecology of the Paraguayan Caiman (*Caiman yacare*) in the Brazilian Pantanal. *Journal of Herpetology* 22: 219-222.
- Clark, J.M., Norell, M.A. and Chiappe, L.M., 1999. An oviraptorid skeleton from the Late Cretaceous of Ukhaa Tolgod, Mongolia, preserved in an avianlike brooding position over an oviraptorid nest. *American Museum Novitates* 3265: 1-35.
- Codrea, V., Smith, T., Dica, P., Folie, A., Garcia, G., Godefroit, P. and Van Itterbeeck, J., 2002. Dinosaur egg nests, mammals and other vertebrates from a new Maastrichtian site of the Hateg Basin (Romania). *Comptes Rendus Palevol* 1: 173-180.

- Cott, H.B., 1961. Scientific results of an inquiry into the ecology and economic status of the Nile Crocodile (*Crocodylus niloticus*) in Uganda and Northern Rhodesia. The Transactions of the Zoological Society of London 29: 211-356.
- Cousin, R., Breton, G., Fournier, R. and Watte, J.-P., 1989. Dinosaur egg-laying and nesting: the case of an Upper Maastrichtian site at Rennes-le-Chateau (Aude, France). Historical Biology 2: 157-167.
- Crawshaw, P.G. and Schaller, G.B., 1980. Nesting of Paraguayan Caiman (*Caiman yacare*) in Brazil. Papeis Avulsos de Zoologia 33: 283-292.
- Crome, F.H.J. and Brown, H.E., 1979. Notes on social organization and breeding of the Orange-footed Scrubfowl *Megapodius reinwardt*. Emu 79: 111-119.
- Dekker, R.W.R.J., 1988. Notes on ground temperatures at nesting sites of the Maleo *Macrocephalon maleo* (Megapodiidae). Emu 88: 124-127.
- Dekker, R.W.R.J., Argeloo, M. and Jepson, P., 1995. Notes on the Moluccan Megapode *Eulipoa wallacei* (G.R. Gray, 1860) following the rediscovery of two major nesting grounds. Zoologische Mededelingen 69: 251-260.
- Dewaele, L., Tsogtbaatar, K., Barsbold, R., Garcia, G., Stein, K., Escuillie, F. and Godefroit, P., 2015. Perinatal Specimens of *Saurolophus angustirostris* (Dinosauria: Hadrosauridae), from the Upper Cretaceous of Mongolia. PLoS One 10: 10.1371/journal.pone.0138806.
- Diaz-Molina, M., Kalin, O., Benito, M.I., Lopez-Martinez, N. and Vicens, E., 2007. Depositional setting and early diagenesis of the dinosaur eggshell-bearing Aren Fm at Bastus, Late Campanian, south-central Pyrenees. Sedimentary Geology 199: 205-221.
- Dong, Z.M. and Currie, P.J., 1996. On the discovery of an oviraptorid skeleton on a nest of eggs at Bayan Mandahu, Inner Mongolia, People's Republic of China. Canadian Journal of Earth Sciences 33: 631-636.
- Ensom, P.C., 1996. Reptile eggshell from the Purbeck Limestone Group of Dorset, Southern England. Proceedings of Dorset Natural History and Archaeological Society 118: 79-83.
- Erickson, G.M., Zelenitsky, D.K., Kay, D.I. and Norell, M.A., 2017. Dinosaur incubation periods directly determined from growth-line

counts in embryonic teeth show reptilian-grade development. Proceedings of the National Academy of Sciences of the United States of America 114: 540-545.

Espinosa-Blanco, A.S., Seijas, A.E. and Hernández, O., 2013. Egg collection as a conservation tool of Orinoco Crocodile (*Crocodylus intermedius*) in the Cojedes River System, Venezuela. Interciencia 38: 358.

Faccio, G., 1994. Dinosaurian eggs from the Upper Cretaceous of Uruguay. In: K. Carpenter, K.F. Hirsch and J.R. Horner (Editors), Dinosaur Eggs and Babies. Cambridge University Press, Cambridge, UK, pp. 47-55.

Falanruw, M.V.C., 1975. Distribution of the Micronesian Megapode *Megapodius laperouse* in the Northern Mariana Islands. Micronesica 11: 149-150.

Fang, X., Lu, L., Cheng, Z., Zou, Y., Pang, Q., Wang, Y., Chen, K., Yin, Z., Wang, X., Liu, J., Xie, H. and Jin, Y., 1998. On the Cretaceous Fossil Eggs of Xixia County, Henan Province. Geological Publishing House, Beijing, China, 125 pp.

Fang, X., Lu, L., Jiang, Y. and Yang, L., 2003. Cretaceous fossil eggs from the Tiantai basin of Zhejiang, with a discussion on the extinction of dinosaurs. Geological Bulletin of China 22: 512-520.

Fang, X., Wang, Y. and Jiang, Y., 2000. On the Late Cretaceous fossil eggs of Tiantai, Zhejiang. Geological Review 46: 107-112.

Fang, X., Zhang, Z., Pang, Q., Li, P.X., Han, Y., Xie, H., Yan, R., Pang, F., Lu, J. and Cheng, Z., 2007. Cretaceous strata and egg fossils in Xixia, Henan Province. Acta Geologica Sinica 28: 123-142.

Fang, X., Zhang, Z., Zhang, X., Lu, L., Han, Y. and Li, P., 2005. Fossil eggs from the Heyuan Basin, east-central Guangdong, China. Geological Bulletin of China 24: 682-686.

Fang, X.S., Li, P.X., Zhang, Z.J., Zhang, X.Q., Lin, Y.L., Guo, S.B., Cheng, Y.M., Li, Z.Y., Zhang, X.J. and Cheng, Z.W., 2009. Cretaceous strata in Nanxiong Basin of Guangdong and the evolution from the dinosaur egg to the bird egg. Acta Geoscientica Sinica 30: 167-186.

Fanti, F., Currie, P.J. and Badamgarav, D., 2012. New specimens of *Nemegtomaia* from the Baruungoyot and Nemegt formations (Late Cretaceous) of Mongolia. PLoS One 7: 10.1371/journal.pone.0031330.

- Fiorelli, L.E., Grellet-Tinner, G., Alasino, P.H. and Arganaraz, E., 2012. The geology and palaeoecology of the newly discovered Cretaceous neosauropod hydrothermal nesting site in Sanagasta (Los Llanos Formation), La Rioja, northwest Argentina. *Cretaceous Research* 35: 94-117.
- Fondevilla, V., Dinares-Turell, J., Vila, B., Le Loeuff, J., Estrada, R., Oms, O. and Galobart, A., 2016. Magnetostratigraphy of the Maastrichtian continental record in the Upper Aude Valley (northern Pyrenees, France): Placing age constraints on the succession of dinosaur-bearing sites. *Cretaceous Research* 57: 457-472.
- Friedlander, B., 1899. Über die Nestlöcher des *Megapodius pritchardi* auf der Insel Niuaufu. *Ornithologische Monatsberichte* 7: 37-40.
- Frith, H.J., 1956. Breeding habits in the family Megapodiidae. *Ibis* 98: 620-640.
- Frith, H.J., 1959. Breeding of the Mallee Fowl, *Leipoa ocellata* Gould (Megapodiidae). *Wildlife Research* 4: 31-60.
- Garcia, G., 2000. New data on the fossil eggshell diversity from the lower Maastrichtian of southern France. *Geobios* 33: 113-126.
- Garcia, G., Feist, M., Cabot, A., Valentin, X. and Vianey-Liaud, M., 2000. New *Prismatoolithus* oospecies and other Upper Cretaceous dinosaur eggs from the Villeveyrac-Meze Basin (Herault, France). *Bulletin de la Societe Geologique de France* 171: 283-289.
- Garcia, G., Tabuce, R., Cappetta, H., Marandat, B., Bentaleb, I., Benabdallah, A. and Vianey-Liaud, M., 2003. First record of dinosaur eggshells and teeth from the North-West African Maastrichtian (Morocco). *Palaeovertebrata* 32: 59-69.
- Garcia, G. and Vianey-Liaud, M., 2001. Dinosaur eggshells as biochronological markers in Upper Cretaceous continental deposits. *Palaeogeography Palaeoclimatology Palaeoecology* 169: 153-164.
- Genise, J.F. and Sarzetti, L.C., 2011. Fossil cocoons associated with a dinosaur egg from Patagonia, Argentina. *Palaeontology* 54: 815-823.
- Gilliard, E.T. and LeCroy, M., 1970. Notes on birds from the Tamrau Mountains, New Guinea. *American Museum Novitates* 2420: 1-28.
- Glass, P.O., Reichel, J.D., Villagomez, E.C., Taisacan, E. and Aldan, D., 1988. Micronesian megapode surveys and research. Five Year Progress Report 1983-1987 (Pittman-Robertson Federal Aid in Wildlife Restoration Program), pp. 131-153.



- Godefroit, P., Golovneva, L., Shchepetov, S., Garcia, G. and Alekseev, P., 2009. The last polar dinosaurs: high diversity of latest Cretaceous arctic dinosaurs in Russia. *Naturwissenschaften* 96: 495-501.
- Goodwin, T.M. and Marion, W.R., 1978. Aspects of nesting ecology of American alligators (*Alligator mississippiensis*) in north-central Florida. *Herpetologica* 34: 43-47.
- Goth, A. and Vogel, U., 1996-1997. Egg laying and incubation of the Polynesian Megapodes. *Annual Review of the World Pheasant Association*: 43-54.
- Gottfried, M.D., O'Connor, P.M., Jackson, R.D., Roberts, E.M. and Cham, R., 2004. Dinosaur eggshell from the red sandstone group of Tanzania. *Journal of Vertebrate Paleontology* 24: 494-497.
- Grellet-Tinner, G., Chiappe, L., Norell, M. and Bottjer, D., 2006. Dinosaur eggs and nesting behaviors: a paleobiological investigation. *Palaeogeography, Palaeoclimatology, Palaeoecology* 232: 294-321.
- Grellet-Tinner, G., Chiappe, L.M. and Coria, R., 2004. Eggs of titanosaurid sauropods from the Upper Cretaceous of Auca Mahuevo (Argentina). *Canadian Journal of Earth Sciences* 41: 949-960.
- Grellet-Tinner, G. and Fiorelli, L.E., 2010. A new Argentinean nesting site showing neosauropod dinosaur reproduction in a Cretaceous hydrothermal environment. *Nature Communications* 1: 10.1038/Ncomms1031.
- Grellet-Tinner, G., Fiorelli, L.E. and Salvador, R.B., 2012. Water vapor conductance of the Lower Cretaceous dinosaurian eggs from Sanagasta, La Rioja, Argentina: paleobiological and paleoecological implications for South American faveololithid and megalolithid eggs. *Palaios* 27: 35-47.
- Grellet-Tinner, G. and Makovicky, P., 2006. A possible egg of the dromaeosaur *Deinonychus antirrhopus*: phylogenetic and biological implications. *Canadian Journal of Earth Sciences* 43: 705-719.
- Grigorescu, D., 2016. The 'Tuştea puzzle' revisited: Late Cretaceous (Maastrichtian) Megalolithus eggs associated with *Telmatosaurus* hatchlings in the Haţeg Basin, *Historical Biology* 29: 627-640.
- Grigorescu, D., Garcia, G., Csiki, Z., Codrea, V. and Bojar, A.V., 2010. Uppermost Cretaceous megalolithid eggs from the Haţeg

Basin, Romania, associated with hadrosaur hatchlings: search for explanation. *Palaeogeography Palaeoclimatology Palaeoecology* 293: 360-374.

Grigorescu, D., Weishampel, D.B., Norman, D., Seclamen, M., Rusu, M., Baltres, A. and Teodorescu, V., 1994. Late Maastrichtian dinosaur eggs from the Hateg Basin (Romania). In: K. Carpenter, K.F. Hirsch and J.R. Horner (Editors), *Dinosaur Eggs and Babies*. Cambridge University Press, Cambridge, UK, pp. 75-87.

Hall, P.M. and Johnson, D.R., 1987. Nesting biology of *Crocodylus novaeguineae* in Lake Murray District, Papua New Guinea. *Herpetologica* 43: 249-258.

Hechenleitner, E.M., Fiorelli, L.E., Grellet-Tinner, G., Leuzinger, L., Basilici, G., Taborda, J.R.A., De la Vega, S.R. and Bustamante, C.A., 2016. A new Upper Cretaceous titanosaur nesting site from La Rioja (NW Argentina), with implications for titanosaur nesting strategies. *Palaeontology* 59: 433-446.

Heij, C.J., Rompas, C.F.E. and Moeliker, C.W., 1997. The biology of the Moluccan Megapode *Eulipoa wallacei* (Aves, Galliformes, Megapodiidae) on Haruku and other Moluccan Islands; part 2: final report. *Deinsea* 3: 1-123.

Herron, J.C., Emmons, L.H. and Cadle, J.E., 1990. Observations on reproduction in the Black Caiman, *Melanosuchus niger*. *Journal of Herpetology* 24: 314-316.

Hirsch, K.F. and Quinn, B., 1990. Eggs and eggshell fragments from the Upper Cretaceous Two Medicine Formation of Montana. *Journal of Vertebrate Paleontology* 10: 491-511.

Hirsch, K.F., Stadtman, K.L., Miller, W.E. and Madsen, J.H., 1989. Upper Jurassic dinosaur egg from Utah. *Science* 243: 1711-1713.

Horner, J.R., 1982. Evidence of colonial nesting and 'site fidelity' among ornithischian dinosaurs. *Nature* 297: 675-676.

Horner, J.R., 1999. Egg clutches and embryos of two hadrosaurian dinosaurs. *Journal of Vertebrate Paleontology* 19: 607-611.

Horner, J.R., 2000. Dinosaur reproduction and parenting. *Annual Review of Earth and Planetary Sciences* 28: 19-45.

Horner, J.R. and Currie, P.J., 1994. Embryonic and neonatal morphology and ontogeny of a new species of *Hypacrosaurus* (Ornithischia, Lambeosauridae) from Montana and Alberta. In: K. Carpenter, K.F. Hirsch and J.R. Horner (Editors), *Dinosaur*

- Eggs and Babies. Cambridge University Press, Cambridge, UK, pp. 312-336.
- Horner, J.R. and Makela, R., 1979. Nest of juveniles provides evidence of family structure among dinosaurs. *Nature* 282: 296-298.
- Huh, M., Kim, B.S., Woo, Y., Simon, D.J., Paik, I.S. and Kim, H.J., 2014. First record of a complete giant theropod egg clutch from Upper Cretaceous deposits, South Korea. *Historical Biology* 26: 218-228.
- Huh, M. and Zelenitsky, D.K., 2002. Rich dinosaur nesting site from the Cretaceous of Bosung County, Chullanam-do Province, South Korea. *Journal of Vertebrate Paleontology* 22: 716-718.
- Indrawan, M., Masala, Y. and Pesik, L., 1998. Observations on the breeding behaviour of Sula Scrubfowl *Megapodius bernsteinii* in the Banggai Islands, Sulawesi, Indonesia. *Forktail* 13: 13-16.
- Jackson, F.D., 2007. Titanosaur reproductive biology: comparison of the Auca Mahuevo titanosaur nesting locality (Argentina), to the Pinyes *Megaloolithus* nesting locality (Spain). Ph.D. Thesis, Montana State University, Bozeman, 166 pp.
- Jackson, F.D., Horner, J.R. and Varricchio, D.J., 2010. A study of a *Troodon* egg containing embryonic remains using epifluorescence microscopy and other techniques. *Cretaceous Research* 31: 255-262.
- Jackson, F.D., Schaff, R.J., Varricchio, D.J. and Schmitt, J.G., 2015. A theropod nesting trace with eggs from the Upper Cretaceous (Campanian) Two Medicine Formation of Montana. *Palaios* 30: 362-372.
- Jackson, F.D., Schmitt, J.G. and Oser, S.E., 2013. Influence of Vertisol development on sauropod egg taphonomy and distribution at the Auca Mahuevo locality, Patagonia, Argentina. *Palaeogeography Palaeoclimatology Palaeoecology* 386: 300-307.
- Jackson, F.D. and Varricchio, D.J., 2010. Fossil eggs and eggshell from the lowermost Two Medicine Formation of western Montana, Sevenmile Hill locality. *Journal of Vertebrate Paleontology* 30: 1142-1156.
- Jensen, J.A., 1966. Dinosaur eggs from the Upper Cretaceous North Horn Formation of Central Utah. *Brigham Young University Geology Studies* 13: 55-67.
- Ji, Q., 2009. Study on dinosaur eggs in China: yesterday and today. *Acta Geoscientia Sinica* 30: 285-290.
- Jiang, X.J., Liu, Y.Q., Ji, S.A., Zhang, X.L., Xu, L., Jia, S.H., Lü, J.C., Yuan, C.X. and Li, M., 2011. Dinosaur-bearing strata and K/T

- boundary in the Luanchuan-Tantou Basin of western Henan Province, China. *Science China-Earth Sciences* 54: 1-7.
- Jin, X.S., Azuma, Y., Jackson, F.D. and Varricchio, D.J., 2007. Giant dinosaur eggs from the Tiantai basin, Zhejiang Province, China. *Canadian Journal of Earth Sciences* 44: 81-88.
- Jin, X.S., Jackson, F.D., Varricchio, D.J., Azuma, Y. and He, T., 2010. The first *Dictyoolithus* egg clutches from the Lishui Basin, Zhejiang Province, China. *Journal of Vertebrate Paleontology* 30: 188-195.
- Joanen, T., 1969. Nesting ecology of alligators in Louisiana. *Proceedings of the Annual Conference, Southeastern Association of Game and Fish Commissioneres* 24: 141-151.
- Jones, D.N., 1988. Construction and maintenance of the incubation mounds of the Australian Brush-Turkey *Alectura lathami*. *Emu* 88: 210-218.
- Jones, D.N., Dekker, R.W.R.J. and Roselaar, C.S., 1995. *The Megapodes*. Oxford University Press, Oxford, UK, 262 pp.
- Kellers, H.C., 1931. Biological collecting on "tin-can island". In: *Explorations and Field-Work of the Smithsonian Institution in 1931*. Smithsonian Institution, Washington, pp. 67-76.
- Khosla, A. and Sahni, A., 1995. Parataxonomic classification of Late Cretaceous dinosaur eggshells from India. *Journal of The Palaeontological Society of India* 40: 87-102.
- Kim, J.Y., Yang, S.Y., Choi, H., Seo, S.J. and Kim, K.S., 2011. Dinosaur eggs from the Cretaceous Goseong Formation of Tongyeong City, southern coast of Korea. *Journal of Paleontological Society of Korea* 27: 13-26.
- Kim, S.B., Kim, Y.G., Jo, H.R., Jeong, K.S. and Chough, S.K., 2009. Depositional facies, architecture and environments of the Sihwa Formation (Lower Cretaceous), mid-west Korea with special reference to dinosaur eggs. *Cretaceous Research* 30: 100-126.
- Kitching, J.W., 1979. Preliminary report on a clutch of six dinosaurian eggs from the Upper Triassic Elliot Formation, Northern Orange Free State. *Palaeontologia Africana* 22: 41-45.
- Kofron, C.P., 1989. Nesting ecology of the Nile crocodile (*Crocodylus niloticus*). *African Journal of Ecology* 27: 335-341.
- Krumenacker, L.J., Simon, D.J., Scofield, G. and Varricchio, D.J., 2016. Theropod dinosaurs from the Albian-Cenomanian Wayan

Formation of eastern Idaho. *Historical Biology*: 10.1080/08912963.2015.1137913.

- Kundrat, M., Cruickshank, A.R.I., Manning, T.W. and Nudds, J., 2008. Embryos of therizinosauroid theropods from the Upper Cretaceous of China: diagnosis and analysis of ossification patterns. *Acta Zoologica* 89: 231-251.
- Kurzanov, S.M. and Mikhailov, K.E., 1989. Dinosaur eggshells from the Lower Cretaceous of Mongolia. In: D.D. Gillette and M.G. Lockley (Editors), *Dinosaur Tracks and Traces*. Cambridge University Press, New York, pp. 109-113.
- Kushlan, J.A. and Mazzotti, F.J., 1989. Population biology of the American Crocodile. *Journal of Herpetology* 23: 7-21.
- Le Souef, D., 1899. On the habits of the mound-building birds of Australia. *Ibis* 5: 9-19.
- Lee, Y.-N., 2003. Dinosaur bones and eggs in South Korea. *Memoir of the Fukui Prefectural Dinosaur Museum* 2: 113-121.
- Lewis, F., 1940. Notes on the breeding habits of the Mallee-Fowl. *Emu* 40: 97-110.
- Li, Y., Yin, Z. and Liu, Y., 1995. The discovery of a new genus of dinosaur egg from Xixia, Henan, China. *Journal of Wuhan Institute of Chemical Technology* 17: 38-40.
- Liang, X., Wen, S., Yang, D., Zhou, S. and Wu, S., 2009. Dinosaur eggs and dinosaur egg-bearing deposits (Upper Cretaceous) of Henan Province, China: occurrences, palaeoenvironments, taphonomy and preservation. *Progress in Natural Science* 19: 1587-1601.
- Lincoln, G.A., 1974. Predation of incubator birds (*Megapodius freycinet*) by Komodo dragons (*Varanus komodoensis*). *Journal of Zoology* 174: 419-428.
- Liston, J.J. and Chapman, S.D., 2014. Alfred Nicholson Leeds and the first fossil egg attributed to a 'saurian'. *Historical Biology* 26: 229-235.
- Liu, J.Y., Wang, Q., Zhao, Z., Wang, X.L., Gao, C.L. and Shen, C.Z., 2013. A parataxonomic revision of spheroolithid eggs from the Upper Cretaceous Quantou Formation in Changtu, Liaoning. *Vertebrata Palasiatica* 51: 278-288.
- Lopez-Luna, M.A., Hidalgo-Mihart, M.G., Aguirre-Leon, G., Gonzalez-Ramon, M.D. and Rangel-Mendoza, J.A., 2015. Effect of nesting environment on incubation temperature and hatching success of Morelet's crocodile (*Crocodylus moreletii*) in an urban

- lake of Southeastern Mexico. *Journal of Thermal Biology* 49/50: 66-73.
- Lopez-Martinez, N., Moratalla, J.J. and Sanz, J.L., 2000. Dinosaurs nesting on tidal flats. *Palaeogeography Palaeoclimatology Palaeoecology* 160: 153-163.
- Lopez-Martinez, N. and Vicens, E., 2012. A new peculiar dinosaur egg, *Sankofa pyrenaica* oogen. nov. oosp. nov. from the Upper Cretaceous coastal deposits of the Aren Formation, south-central Pyrenees, Lleida, Catalonia, Spain. *Palaeontology* 55: 325-339.
- Lü, J., Azuma, Y., Huang, D., Noda, Y. and Qiu, L., 2006. New troodontid dinosaur eggs from the Heyuan Basin of Guangdong Province, Southern China. In: J. Lü, Y. Kobayashi, D. Huang and Y.N. Lee (Editors), *Papers from the 2005 Heyuan International Dinosaur Symposium*. Geological Publishing House, Beijing, China, pp. 11-18.
- Lutz, P.L. and Dunbar-Cooper, A., 1984. The nest environment of the American Crocodile (*Crocodylus acutus*). *Copeia* 1984: 153-161.
- MacKinnon, J., 1978. Sulawesi Megapodes. *Journal of the World Pheasant Association* 3: 96-103.
- Magnusson, W.E., Lima, A.P. and Sampaio, R.M., 1985. Sources of heat for nests of *Paleosuchus trigonatus* and a review of crocodylian nest temperatures. *Journal of Herpetology* 19: 199-207.
- Makovicky, P.J. and Grellet-Tinner, G., 2001. Association between theropod eggshell and a specimen of *Deinonychus antirrhopus*. In: A.M. Bravo and T. Reyes (Editors), *First International Symposium on Dinosaur Eggs and Babies Extended Abstracts*, Catalonia, Spain, pp. 123-128.
- Manning, T.W., Joysey, K.A. and Cruickshank, A.R.I., 1997. Observations of microstructures within dinosaur eggs from Henan Province, Peoples' Republic of China. In: D.L. Wolberg, E. Stump and R.D. Rosenberg (Editors), *Dinofest International: Proceedings of a Symposium Held at Arizona State University*. Academy of Natural Sciences, Philadelphia, pp. 287-290.
- Mateus, I., Mateus, H., Antunes, M.T., Mateus, O., Taquet, P., Ribeiro, V. and Manuppella, G., 1997. Clutches, eggs and embryos of theropod dinosaur in the upper Jurassic of Lourinha, Portugal. *Comptes Rendus de l'Académie des Sciences-Series II: A-Earth and Planetary Sciences* 325: 71-78.

- Mauro, I., 2005. Field discovery, mound characteristics, bare parts, vocalisations and behaviour of Bruijn's Brush-turkey (*Aepyodius bruijnii*). *Emu* 105: 273-281.
- Maxwell, W.D. and Horner, J.R., 1994. Neonate dinosaurian remains and dinosaurian eggshell from the Cloverly Formation, Montana. *Journal of Vertebrate Paleontology* 14: 143-146.
- Mazzotti, F.J., 1989. Factors affecting the nesting success of the American Crocodile, *Crocodylus acutus*, in Florida Bay. *Bulletin of Marine Science* 44: 220-228.
- McIlhenny, E.A., 1934. Notes on incubation and growth of alligators. *Copeia* 2: 80-88.
- Medem, F., 1958. The crocodylian genus *Paleosuchus*. *Fieldiana Zoology* 39: 227-247.
- Medem, F., 1971. The reproduction of the Dwarf Caiman *Paleosuchus palpebrosus*, *Crocodyles: Proceedings of the 1st Working Meeting of Crocodile Specialists*. IUCN, New York, pp. 159-165.
- Medem, F., 1981. *Los Crocodylia de sur America Volumen 1. Los Crocodylia de Colombia*. Universidad Nacional de Colombia, Bogota, Colombia, 354 pp.
- Metzen, W.D., 1977. Nesting ecology of alligators on the Okefenokee National Wildlife Refuge. *Proceedings of the Southeastern Association of Fish and Wildlife Agencies* 31: 29-32.
- Mikhailov, K., 1994a. Eggs of sauropod and ornithopod dinosaurs from the Cretaceous deposits of Mongolia. *Paleontological Journal* 28: 141-159.
- Mikhailov, K., 1994b. Theropod and protoceratopsian dinosaur eggs from the Cretaceous of Mongolia and Kazakhstan. *Paleontological Journal* 28: 101-120.
- Modha, M.L., 1967. The ecology of the Nile Crocodile (*Crocodylus niloticus* Laurenti) on Central Island, Lake Rudolf. *African Journal of Ecology* 5: 74-95.
- Mohabey, D.M., 1996. A new oospecies, *Megaloolithus matleyi*, from the Lameta Formation (Upper Cretaceous) of Chandrapur district, Maharashtra, India, and general remarks on the palaeoenvironment and nesting behaviour of dinosaurs. *Cretaceous*

Research 17: 183-196.

- Mohabey, D.M., 1998. Systematics of Indian Upper Cretaceous dinosaur and chelonian eggshells. *Journal of Vertebrate Paleontology* 18: 348-362.
- Mohabey, D.M., 2000. Indian dinosaur eggs: a review. *Journal of the Geological Society of India* 58: 479-508.
- Mohabey, D.M., 2001. Indian Upper Cretaceous (Maastrichtian) dinosaur eggs: their parataxonomy and implications in understanding the nesting behaviour. In: A.M. Bravo and T. Reyes (Editors), *First International Symposium on Dinosaur Eggs and Babies Extended Abstracts*, Catalonia, Spain, pp. 139-154.
- Mohabey, D.M. and Mathur, U.B., 1989. Upper Cretaceous dinosaur eggs from new localities of Gujarat, India. *Journal of the Geological Society of India* 33: 32-37.
- Mones, A., 1980. Nuevos elementos de la paleoherpetofauna del Uruguay (Crocodilia y Dinosauria). *Actas del Segundo Congreso Argentino de Paleontología y Bioestratigrafía y Primer Congreso Latinoamericano de Paleontología: Buenos Aires, Argentina, 2-6 de abril, 1978*, 1: 265-278.
- Montini, J.P., Piña, C.I., Larriera, A., Siroski, P. and Verdade, L.M., 2006. The relationship between nesting habitat and hatching success in *Caiman latirostris* (Crocodylia, Alligatoridae). *Phyllomedusa: Journal of Herpetology* 5: 91-96.
- Moreno-Azanza, M., Canudo, J.I. and Gasca, J.M., 2014a. Spheroolithid eggshells in the Lower Cretaceous of Europe. Implications for eggshell evolution in ornithischian dinosaurs. *Cretaceous Research* 51: 75-87.
- Moreno-Azanza, M., Canudo, J.I. and Gasca, J.M., 2014b. Unusual theropod eggshells from the Early Cretaceous Blesa Formation of the Iberian Range, Spain. *Acta Palaeontologica Polonica* 59: 843-854.
- Nair, T. and Katdare, S., 2013. Dry-season assessment of gharials (*Gavialis gangeticus*) in the Betwa, Ken and Son Rivers, India. In: *World crocodile conference. Proceedings of the 22nd Working Meeting of the IUCN-SSC Crocodile Specialist Group*. IUCN, Gland, Switzerland, pp. 53-65.
- Neil, W.T., 1946. Notes on *Crocodylus novaeguineae*. *Copeia* 1946: 17-20.



- Norell, M., Clark, J.M. and Chiappe, L.M., 2001. An embryonic oviraptorid (Dinosauria: Theropoda) from the Upper Cretaceous of Mongolia. *American Museum Novitates* 3315: 1-17.
- Norell, M.A., Clark, J.M., Demberelyin, D., Rhinchen, B., Chiappe, L.M., Davidson, A.R., Mckenna, M.C., Altangerel, P. and Novacek, M.J., 1994. A theropod dinosaur embryo and the affinities of the Flaming Cliffs dinosaur eggs. *Science* 266: 779-782.
- Ogden, J.C., 1978. Status and nesting biology of American Crocodile, *Crocodylus acutus*, (Reptilia, Crocodylidae) in Florida. *Journal of Herpetology* 12: 183-196.
- Ouboter, P.E. and Nanho, L.M.R., 1987. Notes on nesting and parental care in *Caiman crocodilus crocodilus* in northern Suriname and an analysis of crocodylian nesting habitats. *Amphibia-Reptilia* 8: 331-347.
- Paik, I.S., Huh, M. and Kim, H.J., 2004. Dinosaur egg-bearing deposits (Upper Cretaceous) of Boseong, Korea: occurrence, palaeoenvironments, taphonomy, and preservation. *Palaeogeography Palaeoclimatology Palaeoecology* 205: 155-168.
- Paik, I.S., Kim, H.J. and Huh, M., 2012. Dinosaur egg deposits in the Cretaceous Gyeongsang Supergroup, Korea: diversity and paleobiological implications. *Journal of Asian Earth Sciences* 56: 135-146.
- Peitz, C., 2001. Megaloolithid dinosaur eggs from the Maastrichtian of Catalunya (NE-Spain) - parataxonomic implications and stratigraphic utility. In: A.M. Bravo and T. Reyes (Editors), *First International Symposium on Dinosaur Eggs and Babies Extended Abstracts*, Catalonia, Spain, pp. 155-160.
- Platt, S.G., Rainwater, T.R., Thorbjarnarson, J.B. and McMurry, S.T., 2008. Reproductive dynamics of a tropical freshwater crocodylian: Morelet's crocodile in northern Belize. *Journal of Zoology* 275: 177-189.
- Platt, S.G. and Thorbjarnarson, J.B., 2000. Nesting ecology of the American crocodile in the coastal zone of Belize. *Copeia*: 869-873.
- Pooley, A.C., 1969. Preliminary studies on the breeding of the Nile Crocodile *Crocodylus niloticus*, in Zululand. *Lammergeyer* 10: 22-44.
- Qian, M., Jiang, Y., Chen, R., Jiang, Y., Zhang, Y.L. and Xin, G., 2008. Late Cretaceous troodontid eggs from Tiantai, Zhejiang. *Acta Palaeontologica Sinica*: 248-255.

- Rand, A.L. and Gilliard, E.T., 1967. Handbook of New Guinea Birds. Weidenfeld and Nicolson, London, UK, 612 pp.
- Rao, R.J., 1988. Nesting Ecology of the Gharial in National Chambal Sanctuary. Wildlife Institute of India, Dehradun, India, 105 pp.
- Rao, R.J. and Gaurjwar, R.K., 2013. Crocodile human conflict in National Chambal Sanctuary, India. In: World Crocodile Conference: Proceedings of the 22nd Working Meeting of the IUCN-SSC Crocodile Specialist Group. IUCN, Gland, Switzerland, pp. 105-109.
- Reisz, R.R., Evans, D.C., Roberts, E.M., Sues, H.D. and Yates, A.M., 2012. Oldest known dinosaurian nesting site and reproductive biology of the Early Jurassic sauropodomorph *Massospondylus*. Proceedings of the National Academy of Sciences of the United States of America 109: 2428-2433.
- Reisz, R.R., Huang, T.D., Roberts, E.M., Peng, S.R., Sullivan, C., Stein, K., LeBlanc, A.R.H., Shieh, D., Chang, R.S., Chiang, C.C., Yang, C.W. and Zhong, S.M., 2013. Embryology of Early Jurassic dinosaur from China with evidence of preserved organic remains. Nature 496: 210-214.
- Ribeiro, C.M.M., 2002. Ovo e fragmentos de cascas de ovos de dinossauros, provenientes da regiao de Peiropolis, Uberaba, Minas Gerais. Arquivos do Museu Nacional 60: 223-228.
- Ribeiro, V., Mateus, O., Holwerda, F., Araujo, R. and Castanhinha, R., 2014. Two new theropod egg sites from the Late Jurassic Lourinha Formation, Portugal. Historical Biology 26: 206-217.
- Riley, J. and Huchzermeyer, F.W., 1999. African dwarf crocodiles in the Likouala swamp forests of the congo basin: habitat, density, and nesting. Copeia: 313-320.
- Ripley, S.D., 1960. Distribution and niche differentiation in species of megapodes in the Moluccas and western Papuan Area. Proceedings of the XIIth International Ornithological Congress, Helsinki, 1958: 631-640.
- Rivas, J.A., Aktay, S.A. and Owens, R.Y., 2001. *Paleosuchus trigonatus* (Schneider's Smooth-fronted Caiman) nesting. Herpetological Review 32: 251.
- Roper, D.S., 1983. Egg incubation and laying behavior of the incubator bird *Megapodius freycinet* on Savo. Ibis 125: 384-389.

- Sabath, K., 1991. Upper Cretaceous amniotic eggs from the Gobi Desert. *Palaeontologica* 36: 151-192.
- Salgado, L., Coria, R.A., Ribeiro, C.M.M., Garrido, A., Rogers, R., Simon, M.E., Arcucci, A.B., Rogers, K.C., Carabajal, A.P., Apesteguía, S., Fernandez, M., Garcia, R.A. and Talevi, M., 2007. Upper Cretaceous dinosaur nesting sites of Rio Negro (Salitral Ojo de Agua and Salinas de Trapalco-Salitral de Santa Rosa), northern Patagonia, Argentina. *Cretaceous Research* 28: 392-404.
- Salgado, L., Ribeiro, C.M., Garcia, R.A. and Fernandez, M.S., 2009. Late Cretaceous megaloolithid eggs from Salitral de Santa Rosa (Rio Negro, Patagonia, Argentina): inferences on the titanosaurian reproductive biology. *Ameghiniana* 46: 605-620.
- Sander, P.M., Peitz, C., Gallemi, J. and Cousin, R., 1998. Dinosaurs nesting on a red beach? *Comptes Rendus de l'Académie des Sciences-Series II: A-Earth and Planetary Sciences* 327: 67-74.
- Sankaran, R., 1995. The distribution, status and conservation of the Nicobar Megapode *Megapodius nicobariensis*. *Biological Conservation* 72: 17-25.
- Sanz, J.L., Moratalla, J.J., Diazmolina, M., Lopezmartinez, N., Kalin, O. and Vianeyliaud, M., 1995. Dinosaur nests at the sea shore. *Nature* 376: 731-732.
- Sato, T., Cheng, Y.N., Wu, X.C., Zelenitsky, D.K. and Hsiao, Y.F., 2005. A pair of shelled eggs inside a female dinosaur. *Science* 308: 375-375.
- Seijas, A.E., 1998. The Orinoco Crocodile (*Crocodylus intemedius*) in the Cojedes River System, Venezuela: population status and ecological characteristics. Ph.D. Thesis, University of Florida, Gainesville, 191 pp.
- Sellés, A.G., Bravo, A.M., Delclos, X., Colombo, F., Marti, X., Ortega-Blanco, J., Parellada, C. and Galobart, A., 2013. Dinosaur eggs in the Upper Cretaceous of the Coll de Nargo area, Lleida Province, south-central Pyrenees, Spain: oodiversity, biostratigraphy and their implications. *Cretaceous Research* 40: 10-20.
- Sellés, A.G., Via, B. and Galobart, A., 2014. *Spheroolithus europaeus*, oosp. nov. (late Maastrichtian, Catalonia), the youngest oological record of hadrosauroids in Eurasia. *Journal of Vertebrate Paleontology* 34: 725-729.

- Seymour, R.S. and Bradford, D.F., 1992. Temperature regulation in the incubation mounds of the Australian Brush-Turkey. *Condor* 94: 134-150.
- Sinclair, J.R., 2001. Temperature regulation in mounds of three sympatric species of megapode (Aves: Megapodiidae) in Papua New Guinea: testing the 'Seymour Model'. *Australian Journal of Zoology* 49: 675-694.
- Sivakumar, K. and Sankaran, R., 2003. The incubation mound and hatching success of the Nicobar Megapode *Megapodius nicobariensis* Blyth. *Journal of the Bombay Natural History Society* 100: 375-387.
- Smith, T., Codrea, V.A., Sasaran, E., Van Itterbeeck, J., Bultynck, P., Csiki, Z., Dica, P., Farcas, C., Folie, A., Garcia, G. and Godefroit, P., 2002. A new exceptional vertebrate site from the Late Cretaceous of the Hateg Basin (Romania). *Studia Universitatis Babeş-Bolyai, Geologia, Special Issue 1*: 321-330.
- Sochava, A.V., 1969. Dinosaur eggs from the Upper Cretaceous of the Gobi Desert. *Paleontological Journal* 4: 517-527.
- Somaweera, R. and Shine, R., 2013. Nest-site selection by crocodiles at a rocky site in the Australian tropics: making the best of a bad lot. *Austral Ecology* 38: 313-325.
- Soto, M., Perea, D. and Cambiaso, A., 2012. First sauropod (Dinosauria: Saurischia) remains from the Guichon Formation, Late Cretaceous of Uruguay. *Journal of South American Earth Sciences* 33: 68-79.
- Srivastava, A.K. and Mankar, R.S., 2015. *Megaloolithus* dinosaur nest from the Lameta Formation of Salbardi area, districts Amravati, Maharashtra and Betul, Madhya Pradesh. *Journal of the Geological Society of India* 85: 457-462.
- Srivastava, S., Mohabey, D.M., Sahni, A. and Pant, S.C., 1986. Upper Cretaceous dinosaur egg clutches from Kheda District (Gujarat, India). *Palaeontographica Abteilung A: Palaeozoologie-Stratigraphie* 193: 219-233.
- Staniewicz, A., 2011. Diet and demography of *Tomistoma schlegelii* in Mesangat Lake, East Kalimantan, Indonesia: June–September 2011. University of Bristol, School of Biological Sciences. Unpublished Report for EAZA IUCN/SSC Southeast Asia Campaign: See <http://www.dgght-zgap-artenschutz.de/media/projekte/mesangat/2011%20Mesangat%20Tomistoma%20report.pdf>.

- Staton, M.A. and Dixon, J.R., 1977. Breeding biology of the Spectacled Caiman, *Caiman crocodilus crocodilus*, in the Venezuelan Llanos. In: Wildlife Research Report 5. United States Department of the Interior, Fish and Wildlife Service, Washington, pp. 1-21.
- Stinson, D.W. and Glass, P.O., 1992. The Micronesian megapode *Megapodius laperouse*: conservation and research needs. Zoologische Verhandelingen 278: 53-55.
- Stresemann, E., 1914. Beiträge zur Kenntnis der Avifauna von Buru. Notitates Zoologicae 21: 358-400.
- Stuebing, R. and Johan, Z., 1986. The megapodes of Pulau Tiga. The Sabah Museum and State Archives Journal 1: 16-49.
- Suzuki, S. and Watabe, M., 2000a. Report on the Japan - Mongolia Joint Paleontological Expedition to the Gobi desert, 1995. Hayashibara Museum of Natural Sciences Research Bulletin 1: 45-57.
- Suzuki, S. and Watabe, M., 2000b. Report on the Japan - Mongolia Joint Paleontological Expedition to the Gobi desert, 1998. Hayashibara Museum of Natural Sciences Research Bulletin 1: 83-98.
- Swanepoel, D.G.J., Ferguson, N.S. and Perrin, M.R., 2000. Nesting ecology of Nile crocodiles (*Crocodylus niloticus*) in the Olifants River, Kruger National Park. Koedoe 43: 35-46.
- Tanaka, K., Lü, J., Liu, Y., Huang, Z., Kobayashi, Y., Huang, D. and Zelenitsky, D.K., 2012. Statistical approach for classification of dinosaur eggs from the Heyuan Basin at the northeast of Guangdong Province. Acta Geologica Sinica 86: 294-303.
- Tanaka, K., Lü, J.C., Kobayashi, Y., Zelenitsky, D.K., Xu, L., Jia, S.G., Qin, S.A. and Tang, M.N., 2011. Description and phylogenetic position of dinosaur eggshells from the Luanchuan area of western Henan Province, China. Acta Geologica Sinica (English Edition) 85: 66-74.
- Tanaka, K., Zelenitsky, D.K., Saegusa, H., Ikeda, T., DeBuhr, C.L. and Therrien, F., 2016. Dinosaur eggshell assemblage from Japan reveals unknown diversity of small theropods. Cretaceous Research 57: 350-363.
- Thorbjarnarson, J., Wang, X.M. and He, L.J., 2001. Reproductive ecology of the Chinese alligator (*Alligator sinensis*) and implications for conservation. Journal of Herpetology 35: 553-558.

- Thorbjarnarson, J.B. and Hernandez, G., 1993. Reproductive ecology of the Orinoco Crocodile (*Crocodylus intermedius*) in Venezuela. I. Nesting ecology and egg and clutch relationships. *Journal of Herpetology* 27: 363-370.
- van Straelen, V., 1925. The microstructure of the dinosaurian egg-shells from the Cretaceous beds of Mongolia. *American Museum Novitates* 173: 1-4.
- van Weerd, M., 2010. Philippine Crocodile *Crocodylus mindorensis*. In: S.C. Manolis and C. Stevenson (Editors), *Crocodiles: Status, Survey and Conservation Action Plan*. Crocodile Specialist Group, Darwin, Australia, pp. 71-78.
- van Weerd, M., van der Ploeg, J., Rodriguez, D., Guerrero, J., Tarun, B., Telan, S. and de Jonge, J., 2006. Philippine crocodile conservation in Northeast Luzon: an update of population status and new insights into *Crocodylus mindorensis* ecology. In: *Crocodiles: Proceedings of the 18th Working Meeting of the Crocodile Specialist Group*. IUCN - the World Conservation Union, Gland, Switzerland and Cambridge, UK, pp. 306-321.
- Varricchio, D.J., Horner, J.R. and Jackson, F.D., 2002. Embryos and eggs for the Cretaceous theropod dinosaur *Troodon formosus*. *Journal of Vertebrate Paleontology* 22: 564-576.
- Varricchio, D.J., Jackson, F., Borkowski, J.J. and Horner, J.R., 1997. Nest and egg clutches of the dinosaur *Troodon formosus* and the evolution of avian reproductive traits. *Nature* 385: 247-250.
- Varricchio, D.J., Jackson, F. and Trueman, C.N., 1999. A nesting trace with eggs for the Cretaceous theropod dinosaur *Troodon formosus*. *Journal of Vertebrate Paleontology* 19: 91-100.
- Varricchio, D.J., Jin, X.-S. and Jackson, F.D., 2015. Lay, brood, repeat: nest reuse and site fidelity in ecologic time for two Cretaceous troodontid dinosaurs. *Journal of Vertebrate Paleontology* 35: e932797.
- Venczel, M., Vasile, S. and Csiki-Sava, Z., 2015. A Late Cretaceous madtsoiid snake from Romania associated with a megaloolithid egg nest - paleoecological inferences. *Cretaceous Research* 55: 152-163.
- Vianey-Liaud, M., Hirsch, K.E., Sahni, A. and Sige, B., 1997. Late Cretaceous Peruvian eggshells and their relationships with Laurasian and Eastern Gondwanian material. *Geobios* 30: 75-90.

- Vianey-Liaud, M., Khosla, A. and Garcia, G., 2003. Relationships between European and Indian dinosaur eggs and eggshells of the oofamily Megaloolithidae. *Journal of Vertebrate Paleontology* 23: 575-585.
- Vianey-Liaud, M. and Lopez-Martinez, N., 1997. Late Cretaceous dinosaur eggshells from the Tremp Basin, southern Pyrenees, Lleida, Spain. *Journal of Paleontology* 71: 1157-1171.
- Vianey-Liaud, M., Mallan, P., Buscail, O. and Montgelard, C., 1994. Review of French dinosaur eggshells; morphology, structure, mineral, and organic composition. In: K. Carpenter, K.F. Hirsch and J.R. Horner (Editors), *Dinosaur Eggs and Babies*. Cambridge University Press, Cambridge, UK, pp. 151-183.
- Vila, B., Galobart, A., Oms, O., Poza, B. and Bravo, A.M., 2010b. Assessing the nesting strategies of Late Cretaceous titanosaurs: 3-D clutch geometry from a new megaloolithid egg site. *Lethaia* 43: 197-208.
- Vila, B., Jackson, F.D., Fortuny, J., Selles, A.G. and Galobart, A., 2010a. 3-D modelling of megaloolithid clutches: insights about nest construction and dinosaur behaviour. *PLoS One* 5: 10.1371/journal.pone.0010362.
- Vila, B., Selles, A.G. and Beetschen, J.-C., 2017. The controversial Les Labadous eggshells: a new and peculiar dromaeosaurid (Dinosauria: Theropoda) ootype from the Upper Cretaceous of Europe. *Cretaceous Research* 72: 117-123.
- VillamarIn-Jurado, F. and Suarez, E., 2007. Nesting of the Black Caiman (*Melanosuchus niger*) in Northeastern Ecuador. *Journal of Herpetology* 41: 164-167.
- Waitkuwait, W.E., 1985. Investigations of the breeding biology of the West-african slender-snouted crocodile *Crocodylus cataphractus* Cuvier, 1824. *Amphibia-Reptilia* 6: 387-399.
- Wang, D. and Zhou, S., 1995. The discovery of new typical dinosaur egg fossils in Xixia Basin. *Henan Geology* 13: 262-267.
- Wang, Q., Wang, X.L., Zhao, Z.K. and Jiang, Y.G., 2010. A new oogenus of Elongatoolithidae from the Upper Cretaceous Chichengshan Formation of Tiantai Basin, Zhejiang Province. *Vertebrata Palasiatica* 48: 111-118.
- Wang, Q., Zan, S., Jin, L.Y. and Chen, J., 2006. A new oospecies, *Dictyoolithus gongzhulingensis*, from the Early Cretaceous Quantou Formation in the central Jilin Province. *Journal of Jilin University (Earth Science Edition)* 36: 153-157.

- Wang, Q., Zhao, Z., Wang, X., Zhang, S.R. and Jiang, Y., 2013. New forms of dictyoolithids from the Tiantai Basin, Zhejiang Province of China and a parataxonomic revision of the dictyoolithids. *Vertebrata Palasiatica* 51: 43-54.
- Wang, Q., Zhao, Z., Wang, X.L. and Jiang, Y., 2011. New ootypes of dinosaur eggs from the Late Cretaceous in Tiantai Basin, Zhejiang Province, China. *Vertebrata Palasiatica* 49: 446-449.
- Wang, S., Zhang, S., Sullivan, C. and Xu, X., 2016. Elongatoolithid eggs containing oviraptorid (Theropoda, Oviraptorosauria) embryos from the Upper Cretaceous of Southern China. *BMC Evolutionary Biology* 16: 1-21.
- Watabe, M., 2004. New dinosaur ovifauna from the Upper Cretaceous vertebrate fossil locality, Abdrant Nuru, Central part of the Gobi desert, Mongolia. *Hayashibara Museum of Natural Sciences Research Bulletin* 2: 15-27.
- Watabe, M., Tsogtbaatar, K., Suzuki, S. and Saneyoshi, M., 2010. Geology of dinosaur-fossil-bearing localities (Jurassic and Cretaceous: Mesozoic) in the Gobi Desert: results of the HMNS-MPC Joint Paleontological Expedition. *Hayashibara Museum of Natural Sciences Research Bulletin* 3: 41-118.
- Webb, G.J.W., Buckworth, R. and Manolis, S.C., 1983a. *Crocodylus johnstoni* in the Mckinlay River N.T. VI. Nesting biology. *Australian Wildlife Research* 10: 607-637.
- Webb, G.J.W., Messel, H. and Magnusson, W., 1977. Nesting of *Crocodylus porosus* in Arnhem Land, Northern Australia. *Copeia*: 238-249.
- Webb, G.J.W., Sack, G.C., Buckworth, R. and Manolis, S.C., 1983b. An examination of *Crocodylus porosus* nests in two northern Australian fresh water swamps, with an analysis of embryo mortality. *Australian Wildlife Research* 10: 571-605.
- Weir, D.G., 1973. Status and habits of *Megapodius pritchardii*. *Wilson Bulletin* 85: 79-82.
- Welsh, E. and Sankey, J.T., 2005. First dinosaur eggshells from Texas, USA: Aguja Formation (Late Campanian), Big Bend National Park. In: J.T. Sankey and S. Baszio (Editors), *Vertebrate Microfossil Assemblages: Their Role in Paleoecology and Paleobiogeography*. Indiana University Press, Bloomington and Indianapolis, pp. 166-177.
- Whitaker, R. and Whitaker, Z., 1976. Collection and hatching of Marsh Crocodile (*C. palustris*) eggs. *Journal of Bombay Natural*



History Society 73: 403-407.

- Wiles, G.J. and Conry, P.J., 2001. Characteristics of nest mounds of Micronesian Megapodes in Palau. *Journal of Field Ornithology* 72: 267-275.
- Williams, D.L.G., Seymour, R.S. and Kerourio, P., 1984. Structure of fossil dinosaur eggshell from the Aix Basin, France. *Palaeogeography Palaeoclimatology Palaeoecology* 45: 23-37.
- Wilson, J.A., Mohabey, D.M., Peters, S.E. and Head, J.J., 2010. Predation upon hatchling dinosaurs by a new snake from the Late Cretaceous of India. *PLoS Biology* 8: 10.1371/journal.pbio.1000322
- Wu, J. and Peng, A., 2003. Identification, paleogeography, and paleoclimate analyses of fossil dinosaur eggs from Baiyuan-Zhenyuan, Pingxiang, Jiangxi Province. *Relics From South* 3: 42-44.
- Xie, J.-F., Zhang, S.-K., Jin, X.-S., Li, D.-Q. and Zhou, L.-Q., 2016. A new type of dinosaur eggs from Early Cretaceous of Gansu Province, China. *Vertebrata Palasiatica* 54: 1-10.
- Xu, L., 2007. The characters and protection of dinosaurs from Henan Province. Ph.D. Thesis, China University of Geosciences, Beijing, China, 120 pp.
- Young, C.C., 1965. Fossil eggs from Nanhsiung, Kwangtung and Kanchou, Kiangsi. *Vertebrata Palasiatica* 9: 141-170.
- Yun, C.-S. and Yang, S.-Y., 1997. Dinosaur eggshells from the Hasandong Formation, Gyeongsang Supergroup, Korea. *Journal of the Paleontological Society of Korea* 13: 21-36.
- Zelenitsky, D.K., 2004. Description and phylogenetic implications of extant and fossil oologic remains. Ph.D. Thesis, University of Calgary, Calgary, Canada, 364 pp.
- Zelenitsky, D.K., Carpenter, K. and Currie, P.J., 2000. First record of elongatoolithid theropod eggshell from North America: the Asian oogenus *Macroelongatoolithus* from the Lower Cretaceous of Utah. *Journal of Vertebrate Paleontology* 20: 130-138.
- Zelenitsky, D.K. and Hills, L.V., 1996. An egg clutch of *Prismatoolithus levis* oosp. nov. from the Oldman Formation (Upper Cretaceous), Devil's Coulee, southern Alberta. *Canadian Journal of Earth Sciences* 33: 1127-1131.

- Zelenitsky, D.K. and Hills, L.V., 1997. Normal and pathological eggshells of *Spheroolithus albertensis*, oosp. nov., from the Oldman Formation (Judith River Group, late Campanian), southern Alberta. *Journal of Vertebrate Paleontology* 17: 167-171.
- Zelenitsky, D.K., Hills, L.V. and Currie, P.J., 1996. Parataxonomic classification of ornithoid eggshell fragments from the Oldman Formation (Judith River Group; Upper Cretaceous), southern Alberta. *Canadian Journal of Earth Sciences* 33: 1655-1667.
- Zelenitsky, D.K. and Modesto, S.P., 2002. Re-evaluation of the eggshell structure of eggs containing dinosaur embryos from the Lower Jurassic of South Africa. *South African Journal of Science* 98: 407-408.
- Zelenitsky, D.K. and Sloboda, W., 2005. Eggshells. In: P.J. Currie and E.B. Koppelhus (Editors), *Dinosaur Provincial Park: a Spectacular Ancient Ecosystem Revealed*. Indiana University Press, Bloomington, pp. 398-404.
- Zelenitsky, D.K. and Therrien, F., 2008a. Phylogenetic analysis of reproductive traits of maniraptoran theropods and its implications for egg parataxonomy. *Palaeontology* 51: 807-816.
- Zelenitsky, D.K. and Therrien, F., 2008b. Unique maniraptoran egg clutch from the Upper Cretaceous Two Medicine Formation of Montana reveals theropod nesting behaviour. *Palaeontology* 51: 1253-1259.
- Zelenitsky, D.K., Therrien, F., Tanaka, K., Currie, P.J. and DeBuhr, C.L. 2017b. Latest Cretaceous eggshell assemblage from the Willow Creek Formation (upper Maastrichtian - lower Paleocene) of Alberta, Canada, reveals higher dinosaur diversity than represented by skeletal remains. *Canadian Journal of Earth Science* 54: 134-140.
- Zelenitsky, D.K., Therrien, F., Tanaka, K., Kobayashi, Y. and DeBuhr, C.L. 2017a. Dinosaur eggshells from the Santonian Milk River Formation of Alberta, Canada. *Cretaceous Research* 74: 181-187.
- Zeng, D. and Zhang, J., 1979. On the dinosaurian eggs from the western Dongting Basin, Hunan. *Vertebrata Palasiatica* 17: 131-136.
- Zhang, S.-K., 2010. A parataxonomic revision of the Cretaceous faveoololithid eggs of China. *Vertebrata Palasiatica* 48: 203-219.
- Zhang, W. and Huang, P., 1999. The strata with fossil dinosaur eggs and their distribution in Guangdong. *Journal of Stratigraphy* 23: 89-95.
- Zhao, H. and Zhao, Z., 1998. Dinosaur eggs from Xichuan Basin, Henan Province. *Vertebrata Palasiatica* 36: 282-296.

- Zhao, H. and Zhao, Z., 1999. A new form of elongatoolithid dinosaur eggs from the Lower Cretaceous Shahai Formation of Heishan, Liaoning Province. *Vertebrata Palasiatica* 37: 278-284.
- Zhao, Z., 1979. Discovery of the dinosaurian eggs and footprint from Neixiang County, Henan Province. *Vertebrata Palasiatica* 17: 304-309.
- Zhao, Z. and Ding, S., 1976. Discovery of the dinosaurian eggshells from Alxa, Ningxia and its stratigraphic significance. *Vertebrata Palasiatica* 14: 42-44.
- Zhao, Z. and Jiang, Y., 1974. Microscopic studies on the dinosaurian egg-shells from Laiyang, Shantung Province. *Scientia Sinica* 17: 73-83.
- Zhao, Z. and Li, R., 1988. A new structural type of the dinosaur eggs from Anlu Country, Hubei Province. *Vertebrata Palasiatica* 26: 107-115.
- Zhao, Z. and Li, R., 1993. First record of Late Cretaceous hypsilophodontid eggs from Bayan Manduhu, Inner Mongolia. *Vertebrata Palasiatica* 31: 77-84.
- Zhao, Z., Zhang, S., Wang, Q. and Wang, X.L., 2013. Dinosaur diversity during the transition between the middle and late parts of the Late Cretaceous in eastern Shandong Province, China: evidence from dinosaur eggshells. *Chinese Science Bulletin* 58: 4663-4669.
- Zhao, Z.K., 1975. Microstructures of dinosaurian eggshells of Nanxiong, Guangdong, and the problem in egg classification. *Vertebrata Palasiatica* 13: 105-117.
- Zhao, Z.K., Mao, X.Y., Chai, Z.F., Yang, G.C., Kong, P., Ebihara, M. and Zhao, Z.H., 2002. A possible causal relationship between extinction of dinosaurs and K/T iridium enrichment in the Nanxiong Basin, South China: evidence from dinosaur eggshells. *Palaeogeography Palaeoclimatology Palaeoecology* 178: 1-17.
- Zhou, X., Ren, Y., Xu, S. and Guan, K., 1998. Dinosaur eggs of the Late Cretaceous from the Qinglongshan region, Yunxian County, Hubei Province. *Hubei Geology and Mineral Resources* 12: 1-8.

Zou, S.L., Wang, Q. and Wang, X.L., 2013. A new oospecies of parafaveololithids from the Pingxiang Basin, Jiangxi Province of China. *Vertebrata Palasiatica* 51: 102-106.
